# Supplementary material for: Unexpected enhancement of new particle formation by lactic acid sulfate resulting from SO 3 loss in forested and agricultural regions
Source: Copernicus journal article supplement (doi:10.5194/egusphere-2025-4894), 2025-10-29
Supplement: Supplementary file [file Revised Supplementary Material.pdf › Revised Supplementary Material.pdf]

# Supporting information

-for-

## Unexpected enhancement of new particle formation by lactic acid sulfate resulting from SO<sub>3</sub> loss in forested and agricultural regions

Rui Wang, Shuqin Wei<sup>‡</sup>, Zeyao Li<sup>‡</sup>, Kaiyu Xue, Rui Bai, Tianlei Zhang<sup>\*</sup>

*Shaanxi Key Laboratory of Catalysis, School of Chemical & Environment Science, Shaanxi University of Technology, Hanzhong, Shaanxi 723001, P. R. China*

| S. NO | Caption                                                                                                                                                                                                                                                                                                                                                                                                                                                                                                                                                                                                                      |
|-------|------------------------------------------------------------------------------------------------------------------------------------------------------------------------------------------------------------------------------------------------------------------------------------------------------------------------------------------------------------------------------------------------------------------------------------------------------------------------------------------------------------------------------------------------------------------------------------------------------------------------------|
| S5    | The specific outgoing fluxes of LAS                                                                                                                                                                                                                                                                                                                                                                                                                                                                                                                                                                                          |
| S6    | <b>Fig. S1</b> Potential energy surface for the gas-phase reaction of LA(-COOH) with SO <sub>3</sub> at the CCSD(T)-F12/cc-pVDZ-F12//M06-2X/6-311++G(2df,2pd) of theory                                                                                                                                                                                                                                                                                                                                                                                                                                                      |
| S7    | <b>Fig. S2</b> Potential energy surface for the hydrolysis of SO <sub>3</sub> assisted by lactic acid (LA) calculated at the CCSD(T)-F12/cc-pVDZ-F12//M06-2X/6-311++G(2df,2pd) level                                                                                                                                                                                                                                                                                                                                                                                                                                         |
| S9    | <b>Table S1</b> Equilibrium constants (cm <sup>3</sup> ·molecule <sup>-1</sup> ) for the SO <sub>3</sub> ···LA, SO <sub>3</sub> ···H <sub>2</sub> O and LA···H <sub>2</sub> O complexes within the temperature range of 229.7-320.0 K                                                                                                                                                                                                                                                                                                                                                                                        |
| S6    | <b>Table S2</b> Concentrations (molecules·cm <sup>-3</sup> ) of H <sub>2</sub> O, SO <sub>3</sub> ···H <sub>2</sub> O, LA···H <sub>2</sub> O and SO <sub>3</sub> ···LA within the temperature range of 229.7-320.0 K                                                                                                                                                                                                                                                                                                                                                                                                         |
| S10   | <b>Table S3</b> Zero point energy (ZPE/(kcal·mol <sup>-1</sup> )), entropies (S/(kcal·mol <sup>-1</sup> ·K <sup>-1</sup> )), relative electronic energies (ΔE/(kcal·mol <sup>-1</sup> )), relative energies with ZPE corrections (ΔE and Δ(E + ZPE)/(kcal·mol <sup>-1</sup> )), enthalpies (ΔH(298)/(kcal·mol <sup>-1</sup> )), and Gibbs free energies (ΔG(298)/(kcal·mol <sup>-1</sup> )) for the reaction of SO <sub>3</sub> with the OH group of LA, both in the absence and presence of H <sub>2</sub> O and H <sub>2</sub> SO <sub>4</sub> , calculated at the CCSD(T)-F12/cc-pVDZ-F12//M06-2X/6-311++G(2df,2pd) level |
| S11   | <b>Table S4</b> Equilibrium constant (K <sub>eq</sub> , cm <sup>3</sup> molecule <sup>-1</sup> ) and corresponding atmospheric concentrations (molecules cm <sup>-3</sup> ) for the formation of LAS and LASA from SO <sub>3</sub> and LA. Values are based on Gibbs free energy (ΔG) calculated at the CCSD(T)-F12/cc-pVDZ-F12//M06-2X/6-311++G(2df,2pd) level of theory under conditions of 278 K and 101.3 kPa.                                                                                                                                                                                                           |
| S12   | <b>Table S5</b> Rate constant (k, cm <sup>3</sup> ·molecule <sup>-1</sup> ·s <sup>-1</sup> ) for the reaction of SO <sub>3</sub> with LA to producing LAS, both in the absence and presence of H <sub>2</sub> O and H <sub>2</sub> SO <sub>4</sub> , as well as the                                                                                                                                                                                                                                                                                                                                                          |

\* Corresponding authors Tel: +86-0916-2641083, Fax: +86-0916-2641083

E-mail addresses: ztianlei88@l63.com (T. L Zhang)

<sup>‡</sup> Shuqin Wei and Zeyao Li contributed equally to this work

|         |                                                                                                                                                                                                                                                                                                                                                  |
|---------|--------------------------------------------------------------------------------------------------------------------------------------------------------------------------------------------------------------------------------------------------------------------------------------------------------------------------------------------------|
|         | effective rate constants ( $k'$ , $s^{-1}$ ) obtained from master equation analysis over the temperature range of 229-320 K and altitude range of 0-10 km.                                                                                                                                                                                       |
| S13     | <b>Table S6</b> Effective rate constants ( $k'$ , $s^{-1}$ ) for the hydrolysis of $SO_3$ in the presence of $X$ ( $X= LA, H_2SO_4, HNO_3, HCOOH, H_2C_2O_4$ and $NH_3$ ) within the temperature range of 229-320 K and altitude range of 0-10 km                                                                                                |
| S14     | <b>Fig S3</b> Optimized structures of the most stable LAS-SA-A-based clusters, obtained at the M06-2X/6-311++G(2df,2pd) level of theory. Hydrogen bond lengths are indicated in Å (Color code: blue = nitrogen, yellow = sulfur, red = oxygen, gray = carbon, and white = hydrogen)                                                              |
| S15     | <b>Table S7</b> The Gibbs free energy ( $\Delta G$ , $kcal\cdot mol^{-1}$ ) of LAS-SA-A-based clusters at 1 atm and temperatures of 298.15, 278.15, 258.15 and 238.15 K                                                                                                                                                                          |
| S16     | <b>Fig. S4</b> A typical actual $\Delta G$ surface at 278.15 K. [SA] is the concentration of sulfuric acid monomers, [A] the concentration of ammonia monomers and [LAS] is lactic acid sulfate                                                                                                                                                  |
| S17-S18 | <b>Table S8</b> Collision coefficients ( $\beta$ , $cm^3\cdot s^{-1}$ ) for each cluster investigated in the present study                                                                                                                                                                                                                       |
| S19-S21 | <b>Table S9</b> Evaporation rates ( $s^{-1}$ ) of the studied clusters at different temperatures of 298.15, 278.15, 258.15 and 238.15 K                                                                                                                                                                                                          |
| S22     | <b>Table S10</b> Total evaporation coefficients ( $\sum \gamma$ , $s^{-1}$ ) for each cluster analyzed in the present study                                                                                                                                                                                                                      |
| S23-S24 | <b>Table S11</b> Ratios ( $\beta C / \sum \gamma$ ) between monomer molecule collisions and evaporation coefficients for each cluster involving FSA in the present study. [SA] = $1.0 \times 10^7$ molecules $\cdot cm^{-3}$ , [A] = $1.0 \times 10^{10}$ molecules $\cdot cm^{-3}$ , [LAS] = $1.0 \times 10^{10}$ molecules $\cdot cm^{-3}$     |
| S25     | <b>Table S12</b> Formation rate $J$ ( $cm^{-3} s^{-1}$ ) of LAS at $T = 238.15$ K, with [SA] = $10^6$ - $10^8$ molecules $\cdot cm^{-3}$ , [A] = $10^7$ - $10^{11}$ molecules $\cdot cm^{-3}$ , and [LAS] = 0, $10^4$ - $10^7$ molecules $\cdot cm^{-3}$ . SA, A and LAS denote sulfuric acid, ammonia and disulfuric acid, respectively.        |
| S26     | <b>Table S13</b> Formation rate $J$ ( $cm^{-3} s^{-1}$ ) of LAS at $T = 258.15$ K, with [SA] = $10^6$ - $10^8$ molecules $\cdot cm^{-3}$ , [A] = $10^7$ - $10^{11}$ molecules $\cdot cm^{-3}$ , and [LAS] = 0, $10^4$ - $10^7$ molecules $\cdot cm^{-3}$ . SA, A and LAS represent sulfuric acid, ammonia and disulfuric acid, respectively.     |
| S27     | <b>Table S14</b> Formation rate $J$ ( $cm^{-3} s^{-1}$ ) of LAS at $T = 278.15$ K, with [SA] = $10^6$ - $10^8$ molecules $\cdot cm^{-3}$ , [A] = $10^7$ - $10^{11}$ molecules $\cdot cm^{-3}$ , and [LAS] = 0, $10^4$ - $10^7$ molecules $\cdot cm^{-3}$ . SA, A and LAS denote sulfuric acid, ammonia and disulfuric acid, respectively.        |
| S28     | <b>Table S15</b> The formation rate $J$ ( $cm^{-3} s^{-1}$ ) of LAS at $T = 298.15$ K, with [SA] = $10^6$ - $10^8$ molecules $\cdot cm^{-3}$ , [A] = $10^7$ - $10^{11}$ molecules $\cdot cm^{-3}$ , and [LAS] = 0, $10^4$ - $10^7$ molecules $\cdot cm^{-3}$ . SA, A and LAS represent sulfuric acid, ammonia and disulfuric acid, respectively. |
| S29     | <b>Fig. S5</b> (a) Cluster formation rate $J$ and (b) enhancement factor $R$ of LAS as functions of [LAS] ( $10^3$ to $10^6$ molecules $\cdot cm^{-3}$ ) at temperatures of 238.15, 258.15, 278.15 and 298.15 K, with [SA] = $10^5$ molecules $\cdot cm^{-3}$ and [A] = $10^9$ molecules $\cdot cm^{-3}$ .                                       |

|        |                                                                                                                                                                                                                                                                                                                                                                                                                                                                                        |
|--------|----------------------------------------------------------------------------------------------------------------------------------------------------------------------------------------------------------------------------------------------------------------------------------------------------------------------------------------------------------------------------------------------------------------------------------------------------------------------------------------|
| S30    | <b>Fig. S6</b> (a) Cluster formation rate $J$ and (b) enhancement factor $R$ as functions of $[SA]$ and $[A]$ at $[LAS] = 10^5$ molecules·cm <sup>-3</sup> and 278.15 K. Color bars represent the logarithmic values of $\lg[J_{LAS}]$ $\lg[R_{LAS}]$ , respectively.                                                                                                                                                                                                                  |
| S31    | <b>Fig. S7</b> Cluster formation rate ( $J$ ) as a function of $[SA]$ and $[A]$ at $[LAS]=10^5$ molecules·cm <sup>-3</sup> and 238.15 K. Color bars indicate $\log_{10}[J]$ values.                                                                                                                                                                                                                                                                                                    |
| S32    | <b>Fig. S8</b> Cluster formation rate ( $J$ ) as a function of $[SA]$ and $[A]$ at $[LAS]=10^5$ molecules·cm <sup>-3</sup> and 258.15 K. Color bars indicate $\log_{10}[J]$ values.                                                                                                                                                                                                                                                                                                    |
| S33    | <b>Fig. S9</b> Cluster formation rate ( $J$ ) as a function of $[SA]$ and $[A]$ at $[LAS]=10^5$ molecules·cm <sup>-3</sup> and 298.15 K. Color bars indicate $\log_{10}[J]$ values.                                                                                                                                                                                                                                                                                                    |
| S34    | <b>Fig. S10</b> Enhancement factor $R$ as functions of $[SA]$ and $[LAS]$ at $[A] = 10^9$ molecules·cm <sup>-3</sup> and 278.15 K.                                                                                                                                                                                                                                                                                                                                                     |
| S35    | <b>Fig. S11</b> The formation rate $J$ (cm <sup>-3</sup> s <sup>-1</sup> ) of LAS at varying concentrations of A and different condensation sink (CS) values in the SA-A-LAS-based system where $T = 278.15$ K, $[SA] = 10^5$ molecules cm <sup>-3</sup> , $[LAS] = 10^3 \sim 10^6$ molecules cm <sup>-3</sup> . CS = $6 \times 10^{-4}$ s <sup>-1</sup> (dotted lines), $2.6 \times 10^{-3}$ s <sup>-1</sup> (solid lines) and $6 \times 10^{-2}$ s <sup>-1</sup> (dash-dotted lines) |
| S36-37 | <b>Fig. S12</b> Particle formation rates ( $J$ , cm <sup>-3</sup> ·s <sup>-1</sup> ) with varying ratios of $[LAS]:[SA]$ at 278.15 K under different A concentrations ((a) $10^7$ molecules·cm <sup>-3</sup> , (b) $10^9$ molecules·cm <sup>-3</sup> , (c) $10^{11}$ molecules·cm <sup>-3</sup> ). $[LAS] + [SA] = 10^4$ - $10^8$ molecules·cm <sup>-3</sup>                                                                                                                           |
| S38    | <b>Fig. S13</b> Main cluster formation mechanisms in the SA-A-LAS-based system at 238.15 K, with $[SA] = 10^6$ molecules·cm <sup>-3</sup> , $[A] = 10^9$ molecules·cm <sup>-3</sup> , and $[LAS] = 10^5$ molecules·cm <sup>-3</sup> . Only net fluxes contributing more than 5% to cluster growth are shown. Black arrows indicate pure SA-A-based growth pathways; blue arrows represent pathways involving LAS; green arrows denote pure LAS-A-based growth pathways.                |
| S39    | <b>Fig. S14</b> Main cluster formation mechanism in the SA-A-LAS-based system at 258.15 K, with $[SA] = 10^6$ molecules·cm <sup>-3</sup> , $[A] = 10^9$ molecules·cm <sup>-3</sup> , and $[LAS] = 10^5$ molecules·cm <sup>-3</sup> . Only net fluxes contributing more than 5% to cluster growth are shown. Black arrows indicate pure SA-A-based growth pathways; blue arrows represent pathways involving LAS; green arrows denote pure LAS-A-based growth pathways.                 |
| S40    | <b>Fig. S15</b> Main cluster formation mechanisms in the SA-A-LAS-based system at 298.15 K, with $[SA] = 10^6$ molecules·cm <sup>-3</sup> , $[A] = 10^9$ molecules·cm <sup>-3</sup> , and $[LAS] = 10^5$ molecules·cm <sup>-3</sup> . Only net fluxes contributing more than 5% to cluster growth are shown. Black arrows indicate pure SA-A-based growth pathways; blue arrows represent pathways involving LAS; green arrows denote pure LAS-A-based growth pathways.                |
| S41    | <b>Fig. S16</b> Main cluster formation mechanisms in the SA-A-LAS-based system at 278.15 K, with $[SA] = 9.25 \times 10^6$ molecules·cm <sup>-3</sup> , $[A] = 10^9$ molecules·cm <sup>-3</sup> , and $[LAS] = 10^4$ molecules·cm <sup>-3</sup> . Only net fluxes contributing more than 5% to cluster growth are shown.                                                                                                                                                               |

|         |                                                                                                                                                                                                                                                                                                                                                                                                                                                                                                                   |
|---------|-------------------------------------------------------------------------------------------------------------------------------------------------------------------------------------------------------------------------------------------------------------------------------------------------------------------------------------------------------------------------------------------------------------------------------------------------------------------------------------------------------------------|
|         | Black arrows indicate pure SA-A-based growth pathways; blue arrows represent pathways involving LAS; green arrows denote pure LAS-A-based growth pathways.                                                                                                                                                                                                                                                                                                                                                        |
| S42     | <b>Fig. S17</b> Main cluster formation mechanisms in the SA-A-LAS-based system at 278.15 K, with $[SA] = 10^6 \text{ molecules}\cdot\text{cm}^{-3}$ , $[A] = 10^9 \text{ molecules}\cdot\text{cm}^{-3}$ , and $[LAS] = 1.77 \times 10^6 \text{ molecules}\cdot\text{cm}^{-3}$ . Only net fluxes contributing more than 5% to cluster growth are shown. Black arrows indicate pure SA-A-based growth pathways; blue arrows represent pathways involving LAS; green arrows denote pure LAS-A-based growth pathways. |
| S43     | <b>Fig. S18</b> The influence of (a) $[A]$ , (b) $[SA]$ and (c) $[LAS]$ on the relative contribution of the pure SA-A-based clustering route and the LAS participation route to the system flux is analyzed. Others in (a), (b) and (c) indicate that the route contribution of the cluster growing out of the studied system is less than 5%                                                                                                                                                                     |
| S44-S67 | <b>Table S16</b> Cartesian coordinates of all molecules and clusters in the studied system.                                                                                                                                                                                                                                                                                                                                                                                                                       |

### The specific outgoing fluxes of LAS

To quantify the contribution of LAS to SA-A nucleation, we analyzed the steady-state cluster formation fluxes ( $J$ ) output by ACDC. The LAS-related nucleation fraction at a given temperature was defined as the ratio of the total formation flux of all nucleated clusters containing at least one LAS molecule to the total nucleation flux from all pathways. Specifically,

$$f_{\text{LAS}}(T) = \frac{\sum J_{\text{out}}(C_i | C_i \in C_{\text{LAS}})}{\sum J_{\text{out}}(C_i)} \quad (1)$$

where  $J_{\text{out}}(C_i)$  denotes the outgoing flux of cluster  $C_i$  that meets the nucleation criterion (size/composition threshold), and  $C_{\text{LAS}}$  represents the set of all nucleated clusters containing one or more LAS molecules. This metric directly reflects the proportion of new particles formed through LAS-involved pathways under steady-state conditions.

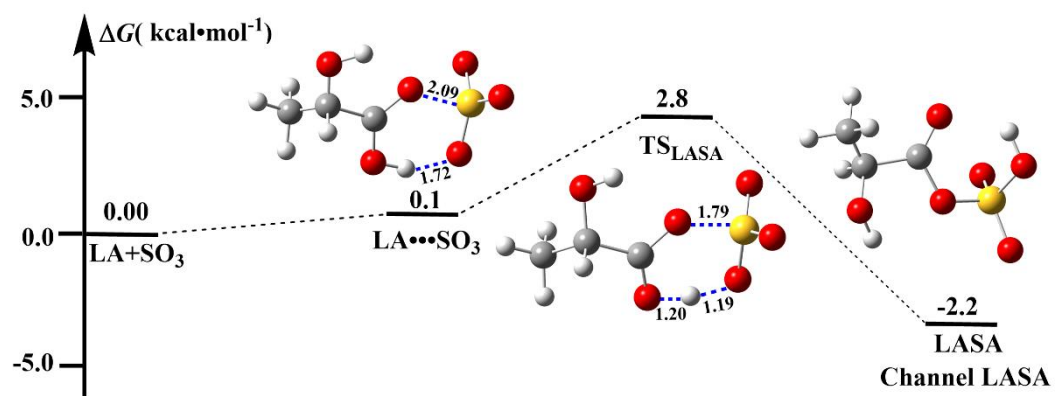

**Fig. S1** Potential energy surface for the gas-phase reaction of LA(-COOH) with SO<sub>3</sub> at the CCSD(T)-F12/cc-pVDZ-F12//M06-2X/6-311++G(2df,2pd) of theory

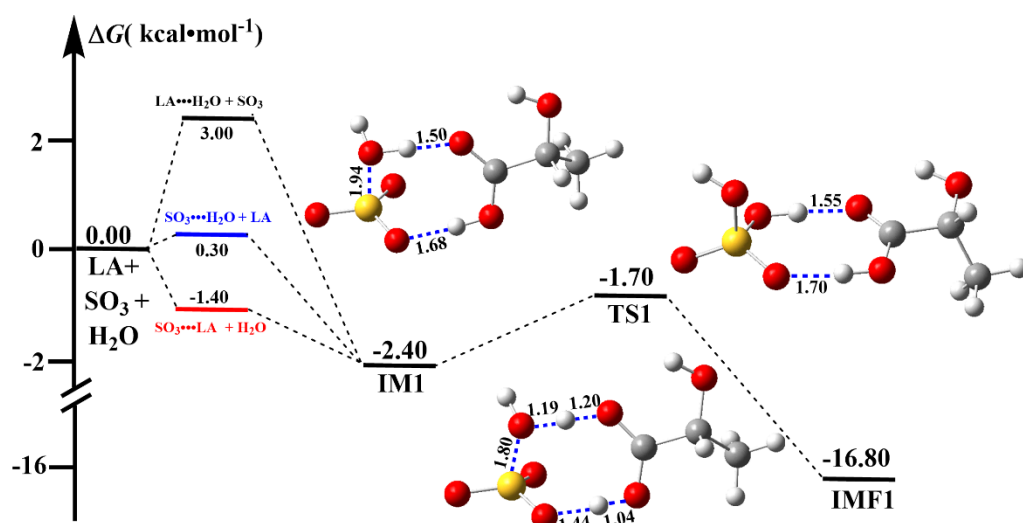

**Fig. S2** Potential energy surface for the hydrolysis of  $\text{SO}_3$  assisted by lactic acid (LA) calculated at the CCSD(T)-F12/cc-pVDZ-F12//M06-2X/6-311++G(2df,2pd) level

**Table S1** Equilibrium constants ( $\text{cm}^3 \cdot \text{molecule}^{-1}$ ) for the  $\text{SO}_3 \cdots \text{LA}$ ,  $\text{SO}_3 \cdots \text{H}_2\text{O}$  and  $\text{LA} \cdots \text{H}_2\text{O}$  complexes within the temperature range of 229.7-320.0 K

| $T/\text{K}$ | $\text{SO}_3 \cdots \text{LA}$ | $\text{SO}_3 \cdots \text{H}_2\text{O}$                           | $\text{LA} \cdots \text{H}_2\text{O}$ |
|--------------|--------------------------------|-------------------------------------------------------------------|---------------------------------------|
| 229.7        | $1.44 \times 10^{-16}$         | $2.70 \times 10^{-18}$                                            | $6.15 \times 10^{-21}$                |
| 259.3        | $7.60 \times 10^{-18}$         | $5.65 \times 10^{-19}$                                            | $1.34 \times 10^{-21}$                |
| 280          | $1.43 \times 10^{-18}$         | $1.77 \times 10^{-19}$                                            | $5.68 \times 10^{-22}$                |
| 290          | $7.08 \times 10^{-19}$         | $1.09 \times 10^{-19}$                                            | $3.95 \times 10^{-22}$                |
| 298          | $4.18 \times 10^{-19}$         | $7.53 \times 10^{-20}$<br>( $5.80 \times 10^{-20}$ ) <sup>a</sup> | $3.01 \times 10^{-22}$                |
| 300          | $3.68 \times 10^{-19}$         | $6.89 \times 10^{-20}$                                            | $2.82 \times 10^{-22}$                |
| 310          | $1.99 \times 10^{-19}$         | $4.51 \times 10^{-20}$                                            | $2.06 \times 10^{-22}$                |
| 320          | $1.13 \times 10^{-19}$         | $3.04 \times 10^{-20}$                                            | $1.54 \times 10^{-22}$                |

<sup>a</sup> The value was taken from reference (*J. Phys. Chem. A*, **2019**, *123*, 3131-3141.).



**Table S2** Concentrations (molecules·cm<sup>-3</sup>) of H<sub>2</sub>O, SO<sub>3</sub>···H<sub>2</sub>O, LA···H<sub>2</sub>O and SO<sub>3</sub>···LA within the temperature range of 229.7-320.0 K

| <i>T</i> /K | H <sub>2</sub> O <sup>a</sup> | SO <sub>3</sub> ···H <sub>2</sub> O<br>[SO <sub>3</sub> ] <sup>b</sup> = 10 <sup>5</sup> | LA···H <sub>2</sub> O<br>[LA] <sup>c</sup> = 10 <sup>12</sup> | SO <sub>3</sub> ···LA   |
|-------------|-------------------------------|------------------------------------------------------------------------------------------|---------------------------------------------------------------|-------------------------|
| 229.7       | 4.90 × 10 <sup>15</sup>       | 1323.0                                                                                   | 3.01 × 10 <sup>7</sup>                                        | 1.44 × 10 <sup>1</sup>  |
| 259.3       | 2.40 × 10 <sup>16</sup>       | 1356.0                                                                                   | 3.22 × 10 <sup>7</sup>                                        | 7.60 × 10 <sup>-1</sup> |
| 280         | 2.58 × 10 <sup>17</sup>       | 4566.7                                                                                   | 1.47 × 10 <sup>8</sup>                                        | 1.43 × 10 <sup>-1</sup> |
| 290         | 4.78 × 10 <sup>17</sup>       | 5210.2                                                                                   | 1.89 × 10 <sup>8</sup>                                        | 7.08 × 10 <sup>-2</sup> |
| 298         | 7.70 × 10 <sup>17</sup>       | 5798.1                                                                                   | 2.32 × 10 <sup>8</sup>                                        | 4.18 × 10 <sup>-2</sup> |
| 300         | 8.58 × 10 <sup>17</sup>       | 5911.6                                                                                   | 2.42 × 10 <sup>8</sup>                                        | 3.68 × 10 <sup>-2</sup> |
| 310         | 1.46 × 10 <sup>18</sup>       | 6584.6                                                                                   | 3.01 × 10 <sup>8</sup>                                        | 1.99 × 10 <sup>-2</sup> |
| 320         | 2.35 × 10 <sup>18</sup>       | 7144.0                                                                                   | 3.62 × 10 <sup>8</sup>                                        | 1.13 × 10 <sup>-2</sup> |

<sup>a</sup> The concentrations (molecules·cm<sup>-3</sup>) of H<sub>2</sub>O values were reported from reference (*J. Phys. Chem. A*, **2013**, *117*, 10381-10396)

<sup>b</sup> The values are reported from reference (*Atmos. Chem. Phys.*, **2024**; *24*:3693-3612)

<sup>c</sup> The values are reported from reference (*Atmos. Environ.*, **2017**; *166*:479-487)

**Table S3** Zero point energy (ZPE/(kcal·mol<sup>-1</sup>)), entropies (S/(kcal·mol<sup>-1</sup>·K<sup>-1</sup>)), relative electronic energies ( $\Delta E$ /(kcal·mol<sup>-1</sup>)), relative energies with ZPE corrections ( $\Delta E$  and  $\Delta(E + \text{ZPE})$ /(kcal·mol<sup>-1</sup>)), enthalpies ( $\Delta H(298)$ /(kcal·mol<sup>-1</sup>)), and Gibbs free energies ( $\Delta G(298)$ /(kcal·mol<sup>-1</sup>)) for the reaction of SO<sub>3</sub> with the OH group of LA, both in the absence and presence of H<sub>2</sub>O and H<sub>2</sub>SO<sub>4</sub>, calculated at the CCSD(T)-F12/cc-pVDZ-F12//M06-2X/6-311++G(2df,2pd) level

| <i>Species</i>                           | ZPE  | $\Delta E$ | S     | $\Delta G$ | $\Delta(E + \text{ZPE})$ | $\Delta H$ |
|------------------------------------------|------|------------|-------|------------|--------------------------|------------|
| LA + SO <sub>3</sub>                     | 68.4 | 0.0        | 105.8 | 0.0        | 0.0                      | 0.0        |
| IM                                       | 70.0 | 1.7        | 75.0  | 5.6        | -5.2                     | -5.1       |
| TS                                       | 67.5 | -1.5       | 66.4  | 27.9       | 15.7                     | 15.2       |
| LAS                                      | 70.4 | 1.6        | 69.3  | -7.7       | -19.5                    | -19.9      |
| LA + SO <sub>3</sub> + H <sub>2</sub> O  | 81.9 | 0.0        | 186.3 | 0.0        | 0.0                      | 0.0        |
| LA + SO <sub>3</sub> ···H <sub>2</sub> O | 84.2 | -9.4       | 131.4 | 0.3        | -7.1                     | -7.6       |
| SO <sub>3</sub> ···LA + H <sub>2</sub> O | 83.9 | -13.9      | 134.8 | -1.4       | -11.8                    | -12.0      |
| LA···H <sub>2</sub> O + SO <sub>3</sub>  | 84.5 | -8.4       | 61.2  | 3.0        | -5.8                     | -6.5       |
| IM_WM1                                   | 86.0 | -20.4      | 96.5  | 3.5        | -16.3                    | -17.0      |
| TS_WM1                                   | 84.4 | -12.7      | 84.9  | 11.3       | -10.2                    | -12.2      |
| LAS···H <sub>2</sub> O                   | 87.1 | -36.2      | 91.5  | -9.9       | -31.0                    | -32.4      |
| LA + SO <sub>3</sub> + SA                | 93.5 | 0.0        | 212.9 | 0.0        | 0.0                      | 0.0        |
| LA + SO <sub>3</sub> ···SA               | 94.7 | -14.5      | 131.4 | -3.3       | -13.3                    | -13.1      |
| SO <sub>3</sub> ···LA + SA               | 95.5 | -13.9      | 134.8 | -1.4       | -11.8                    | -12.0      |
| LA···SA + SO <sub>3</sub>                | 94.9 | -18.0      | 61.2  | -5.5       | -16.6                    | -16.6      |
| IM_SA1                                   | 96.2 | -29.3      | 96.5  | -4.6       | -26.6                    | -26.6      |
| TS_SA1                                   | 92.3 | -23.3      | 84.9  | -1.1       | -24.6                    | -25.3      |
| LAS···SA                                 | 96.4 | -34.9      | 91.5  | -10.0      | -32.0                    | -32.1      |

**Table S4** Equilibrium constant ( $K_{eq}$ ,  $\text{cm}^3 \text{ molecule}^{-1}$ ) and corresponding atmospheric concentrations (molecules  $\text{cm}^{-3}$ ) for the formation of LAS and LASA from  $\text{SO}_3$  and LA. Values are based on Gibbs free energy ( $\Delta G$ ) calculated at the CCSD(T)-F12/cc-pVDZ-F12//M06-2X/6-311++G(2df,2pd) level of theory under conditions of 278 K and 101.3 kPa

| Reaction pathways                               | [LA] <sup>a</sup><br>(molec $\text{cm}^{-3}$ ) | [SO <sub>3</sub> ] <sup>b</sup><br>(molec $\text{cm}^{-3}$ ) | K <sub>eq</sub><br>( $\text{cm}^3 \text{ molec}^{-1}$ ) | [C]<br>(molec $\text{cm}^{-3}$ )                 |
|-------------------------------------------------|------------------------------------------------|--------------------------------------------------------------|---------------------------------------------------------|--------------------------------------------------|
| (LA + SO <sub>3</sub> ) <sub>-OH</sub> → LAS    | 10 <sup>10</sup> - 10 <sup>12</sup>            | 10 <sup>5</sup>                                              | 5.51 × 10 <sup>-12</sup>                                | 5.51 × 10 <sup>3</sup> -5.51 × 10 <sup>5</sup>   |
| (LA + SO <sub>3</sub> ) <sub>-COOH</sub> → LASA | 10 <sup>10</sup> - 10 <sup>12</sup>            | 10 <sup>5</sup>                                              | 7.16 × 10 <sup>-19</sup>                                | 7.16 × 10 <sup>-4</sup> -7.16 × 10 <sup>-2</sup> |

K<sub>eq1</sub> and K<sub>eq2</sub> represent the equilibrium constants for the formation of LAS and LASA from the reaction of  $\text{SO}_3$  with LA, respectively.

K<sub>eq1</sub> and K<sub>eq2</sub> are calculated using equations (S1) and (S2), respectively.

$$K_{eq1} = \frac{[\text{LAS}]}{[\text{LA}][\text{SO}_3]} = e^{\frac{-\Delta G}{RT}} \quad (\text{S2})$$

$$K_{eq2} = \frac{[\text{LASA}]}{[\text{LA}][\text{SO}_3]} = e^{\frac{-\Delta G}{RT}} \quad (\text{S3})$$

The equilibrium concentrations of LAS and LASA are approximately estimated using equations (S3) and (S4), respectively.

$$[\text{LAS}] = K_{eq1}[\text{LA}][\text{SO}_3] \quad (\text{S4})$$

$$[\text{LASA}] = K_{eq2}[\text{LA}][\text{SO}_3] \quad (\text{S5})$$

[LA] and [SO<sub>3</sub>] represent the concentrations of LA and SO<sub>3</sub> monomer, respectively.

## References

<sup>a</sup> The value was taken from reference (Li et al., *Atmos. Environ.*, **2017**, 166, 479-487.)

<sup>b</sup> The value was taken from reference (Yao et al., *Environ. Sci. Technol.*, **2020**, 7, 809-818.)

**Table S5** Rate constant ( $k$ ,  $\text{cm}^3 \cdot \text{molecule}^{-1} \cdot \text{s}^{-1}$ ) for the reaction of  $\text{SO}_3$  with LA to producing LAS, both in the absence and presence of  $\text{H}_2\text{O}$  and  $\text{H}_2\text{SO}_4$ , as well as the effective rate constants ( $k'$ ,  $\text{s}^{-1}$ ) obtained from master equation analysis over the temperature range of 229-320 K and altitude range of 0-10 km

| Altitude             |        | 0 km                   |                        |                        |                        |                        | 5 km                   | 10 km                  |
|----------------------|--------|------------------------|------------------------|------------------------|------------------------|------------------------|------------------------|------------------------|
| T/K                  |        | 280                    | 290                    | 298                    | 300                    | 310                    | 320                    |                        |
| $k_{\text{Without}}$ |        | $9.76 \times 10^{-26}$ | $1.53 \times 10^{-25}$ | $2.22 \times 10^{-25}$ | $2.43 \times 10^{-25}$ | $3.88 \times 10^{-25}$ | $6.21 \times 10^{-25}$ | $4.03 \times 10^{-26}$ |
| $k_{\text{WM}}$      |        | $1.88 \times 10^{-16}$ | $1.95 \times 10^{-16}$ | $2.00 \times 10^{-16}$ | $2.01 \times 10^{-16}$ | $2.08 \times 10^{-16}$ | $2.15 \times 10^{-16}$ | $1.74 \times 10^{-16}$ |
| $k_{\text{SA}}$      |        | $1.49 \times 10^{-11}$ | $1.32 \times 10^{-11}$ | $1.19 \times 10^{-11}$ | $1.16 \times 10^{-11}$ | $9.99 \times 10^{-12}$ | $8.51 \times 10^{-12}$ | $1.72 \times 10^{-11}$ |
| $k'_{\text{WM}}$     | 20%RH  | $3.61 \times 10^{-17}$ | $3.33 \times 10^{-17}$ | $3.08 \times 10^{-17}$ | $3.11 \times 10^{-17}$ | $2.87 \times 10^{-17}$ | $2.63 \times 10^{-17}$ |                        |
|                      | 40%RH  | $7.21 \times 10^{-17}$ | $6.62 \times 10^{-17}$ | $6.36 \times 10^{-17}$ | $6.19 \times 10^{-17}$ | $5.75 \times 10^{-17}$ | $5.26 \times 10^{-17}$ |                        |
|                      | 60%RH  | $1.08 \times 10^{-16}$ | $9.95 \times 10^{-17}$ | $9.23 \times 10^{-17}$ | $9.30 \times 10^{-17}$ | $8.63 \times 10^{-17}$ | $7.89 \times 10^{-17}$ | $1.00 \times 10^{-20}$ |
|                      | 80%RH  | $1.45 \times 10^{-16}$ | $1.32 \times 10^{-16}$ | $1.27 \times 10^{-16}$ | $1.24 \times 10^{-16}$ | $1.15 \times 10^{-16}$ | $1.05 \times 10^{-16}$ | $1.62 \times 10^{-20}$ |
|                      | 100%RH | $1.81 \times 10^{-16}$ | $1.66 \times 10^{-16}$ | $1.58 \times 10^{-16}$ | $1.55 \times 10^{-16}$ | $1.44 \times 10^{-16}$ | $1.31 \times 10^{-16}$ |                        |
| $k'_{\text{SA}}$     |        | $2.87 \times 10^{-16}$ | $8.63 \times 10^{-17}$ | $3.43 \times 10^{-17}$ | $2.68 \times 10^{-17}$ | $8.99 \times 10^{-18}$ | $3.16 \times 10^{-18}$ | $6.10 \times 10^{-16}$ |

$k$ ,  $k_{\text{WM}}$  and  $k_{\text{SA}}$  represent the rate constant for the reaction of  $\text{SO}_3$  with LA to producing LAS in the absence and presence of  $\text{H}_2\text{O}$  and  $\text{H}_2\text{SO}_4$ , respectively;  $k'_{\text{WM}}$  and  $k'_{\text{SA}}$  denote the effective rate constant for this reaction in the presence of  $\text{H}_2\text{O}$  and  $\text{H}_2\text{SO}_4$ , respectively.

**Table S6** Effective rate constants ( $k'$ ,  $\text{s}^{-1}$ ) for the hydrolysis of  $\text{SO}_3$  in the presence of  $X$  ( $X = \text{LA}, \text{H}_2\text{SO}_4, \text{HNO}_3, \text{HCOOH}, \text{H}_2\text{C}_2\text{O}_4$  and  $\text{NH}_3$ ) within the temperature range of 229-320 K and altitude range of 0-10 km

| Altitude             | 0 km                   |                        |                        |                        |                        |                        | 5 km                   | 10 km                  |
|----------------------|------------------------|------------------------|------------------------|------------------------|------------------------|------------------------|------------------------|------------------------|
| T/K                  | 280                    | 290                    | 298                    | 300                    | 310                    | 320                    | 259.3                  | 229.7                  |
| $k'_{\text{SA\_LA}}$ | $3.01 \times 10^{-20}$ | $7.35 \times 10^{-21}$ | $2.55 \times 10^{-21}$ | $1.98 \times 10^{-21}$ | $5.82 \times 10^{-22}$ | $1.85 \times 10^{-22}$ | $8.36 \times 10^{-19}$ | $2.88 \times 10^{-16}$ |
| $k'_{\text{SA\_SA}}$ | $3.51 \times 10^{-23}$ | $1.64 \times 10^{-23}$ | $9.17 \times 10^{-24}$ | $7.80 \times 10^{-24}$ | $3.97 \times 10^{-24}$ | $2.09 \times 10^{-24}$ | $2.99 \times 10^{-21}$ | $7.08 \times 10^{-21}$ |
| $k'_{\text{SA\_NA}}$ | $3.71 \times 10^{-23}$ | $1.93 \times 10^{-23}$ | $1.18 \times 10^{-23}$ | $1.04 \times 10^{-23}$ | $5.88 \times 10^{-24}$ | $3.48 \times 10^{-24}$ | $2.48 \times 10^{-23}$ | $3.60 \times 10^{-21}$ |
| $k'_{\text{SA\_FA}}$ | $4.75 \times 10^{-22}$ | $2.65 \times 10^{-22}$ | $1.70 \times 10^{-22}$ | $1.50 \times 10^{-22}$ | $8.95 \times 10^{-23}$ | $5.40 \times 10^{-23}$ | $1.90 \times 10^{-20}$ | $2.26 \times 10^{-20}$ |
| $k'_{\text{SA\_OA}}$ | $6.51 \times 10^{-22}$ | $3.03 \times 10^{-22}$ | $1.71 \times 10^{-22}$ | $1.48 \times 10^{-22}$ | $7.60 \times 10^{-23}$ | $4.06 \times 10^{-23}$ | $5.60 \times 10^{-20}$ | $2.06 \times 10^{-20}$ |

$k'_{\text{SA\_LA}}$ ,  $k'_{\text{SA\_SA}}$ ,  $k'_{\text{SA\_NA}}$ ,  $k'_{\text{SA\_FA}}$ , and  $k'_{\text{SA\_OA}}$  represent the effective rate constants for the hydrolysis of  $\text{SO}_3$  with LA,  $\text{H}_2\text{SO}_4$ ,  $\text{HNO}_3$ ,  $\text{HCOOH}$ , and  $\text{H}_2\text{C}_2\text{O}_4$ , respectively.

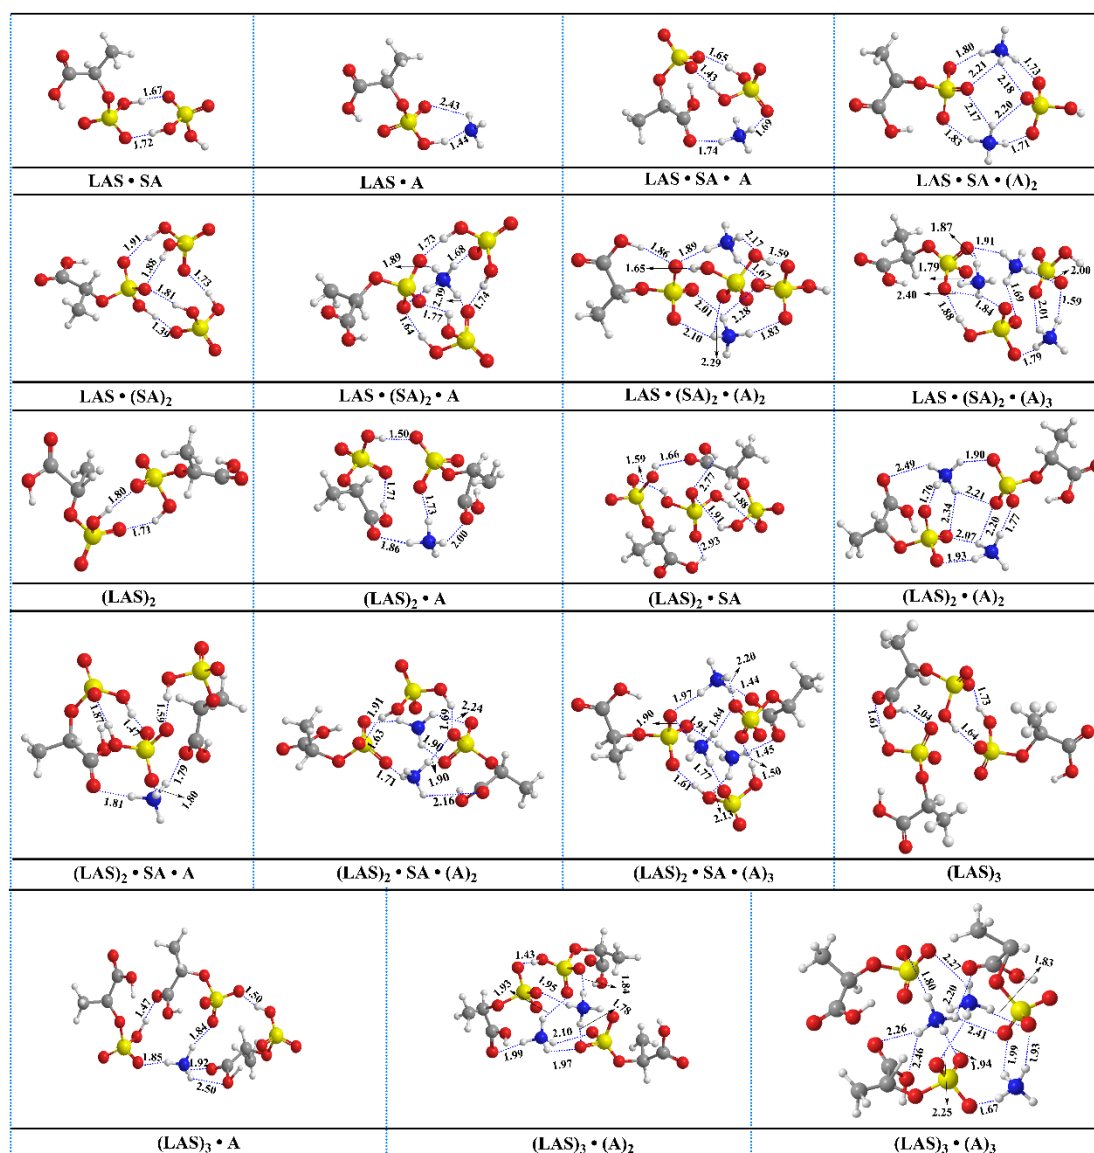

**Fig. S3** Optimized structures of the most stable LAS-SA-A-based clusters, obtained at the M06-2X/6-311++G(2df,2pd) level of theory. Hydrogen bond lengths are indicated in Å (Color code: blue = nitrogen, yellow = sulfur, red = oxygen, gray = carbon, and white = hydrogen)

**Table S7** The Gibbs free energy ( $\Delta G$ , kcal·mol<sup>-1</sup>) of LAS-SA-A-based clusters at 1 atm and temperatures of 298.15, 278.15, 258.15 and 238.15 K

| Clusters                                 | $T = 298.15$ K     | $T = 278.15$ K     | $T = 258.15$ K     | $T = 238.15$ K     |
|------------------------------------------|--------------------|--------------------|--------------------|--------------------|
| SA·A                                     | -5.77<br>(-7.33)   | -6.41<br>(-7.94)   | -7.04<br>(-8.54)   | -7.67<br>(-9.15)   |
| (SA) <sub>2</sub>                        | -8.06<br>(-8.42)   | -8.73<br>(-9.10)   | -9.39<br>(-9.77)   | -10.06<br>(-10.45) |
| (SA) <sub>2</sub> ·A                     | -21.01<br>(-20.84) | -22.53<br>(-22.41) | -24.05<br>(-23.96) | -25.56<br>(-25.52) |
| (SA) <sub>2</sub> ·(A) <sub>2</sub>      | -26.17<br>(-26.55) | -28.39<br>(-28.81) | -30.61<br>(-31.04) | -32.83<br>(-33.28) |
| (SA) <sub>3</sub>                        | -13.03<br>(-13.91) | -14.53<br>(-15.46) | -16.04<br>(-17.00) | -17.56<br>(-18.54) |
| (SA) <sub>3</sub> ·A                     | -28.36<br>(-30.19) | -30.71<br>(-32.52) | -33.06<br>(-34.85) | -35.41<br>(-37.17) |
| (SA) <sub>3</sub> ·(A) <sub>2</sub>      | -41.78<br>(-41.79) | -44.80<br>(-44.87) | -47.83<br>(-47.94) | -50.86<br>(-51.01) |
| (SA) <sub>3</sub> ·(A) <sub>3</sub>      | -51.75<br>(-52.79) | -55.61<br>(-56.64) | -59.47<br>(-60.47) | -63.34<br>(-64.30) |
| (LAS) <sub>2</sub>                       | -3.96              | -4.80              | -5.64              | -6.49              |
| A·LAS                                    | -6.59              | -7.31              | -8.02              | -8.73              |
| (A) <sub>2</sub> ·(LAS) <sub>2</sub>     | -32.18             | -34.56             | -36.94             | -39.32             |
| A·(LAS) <sub>2</sub>                     | -21.53             | -23.37             | -25.21             | -27.06             |
| SA·LAS                                   | -7.16              | -7.96              | -8.76              | -9.57              |
| SA·A·LAS                                 | -19.73             | -21.46             | -23.20             | -24.93             |
| SA·(A) <sub>2</sub> ·LAS                 | -30.14             | -32.43             | -34.72             | -37.01             |
| (LAS) <sub>3</sub>                       | -4.93              | -6.78              | -8.64              | -10.50             |
| SA <sub>2</sub> ·A·LAS                   | -31.82             | -34.19             | -36.56             | -38.94             |
| (SA) <sub>2</sub> ·(A) <sub>2</sub> ·LAS | -39.56             | -42.86             | -46.07             | -49.29             |
| (SA) <sub>2</sub> ·(A) <sub>3</sub> ·LAS | -51.56             | -55.52             | -59.49             | -63.46             |
| SA·(LAS) <sub>2</sub>                    | -7.03              | -8.91              | -10.80             | -12.69             |
| A·(LAS) <sub>3</sub>                     | -36.99             | -39.86             | -42.72             | -45.58             |
| SA·(A) <sub>2</sub> ·(LAS) <sub>2</sub>  | -38.35             | -41.71             | -45.08             | -48.44             |
| (SA) <sub>2</sub> ·LAS                   | -10.00             | -11.71             | -13.42             | -15.14             |
| SA·A·(LAS) <sub>2</sub>                  | -32.41             | -35.10             | -37.78             | -40.47             |
| (A) <sub>2</sub> ·(LAS) <sub>3</sub>     | -40.05             | -43.42             | -46.78             | -50.16             |
| SA·(A) <sub>3</sub> ·(LAS) <sub>2</sub>  | -48.91             | -53.02             | -57.13             | -61.25             |
| (A) <sub>3</sub> ·(LAS) <sub>3</sub>     | -57.22             | -61.41             | -65.62             | -69.83             |

\*Calculated at M06-2X/6-311++G(2df,2pd) level of theory.

The values in parentheses taken from reference (*J. Phys. Chem. A* 2020, 124: 3261-3268.)

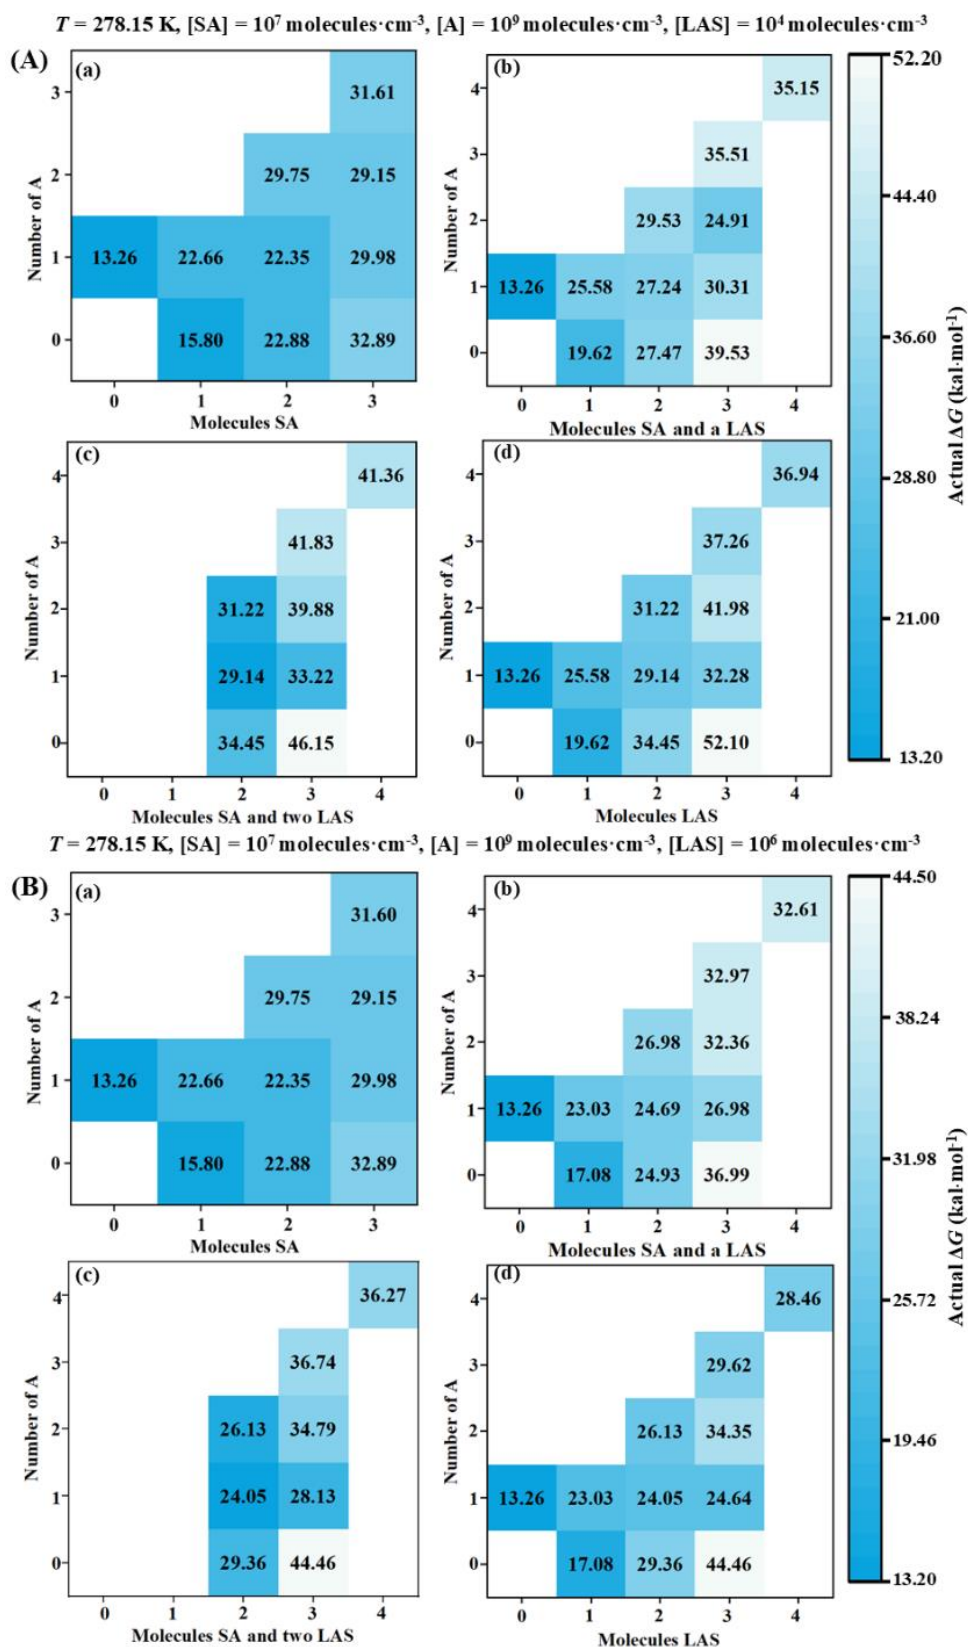

**Fig. S4** A typical actual  $\Delta G$  surface at 278.15 K.  $[\text{SA}]$  is the concentration of sulfuric acid monomers,  $[\text{A}]$  the concentration of ammonia monomers and  $[\text{LAS}]$  is lactic acid sulfate



**Table S8** Collision coefficients ( $\beta$ ,  $\text{cm}^3\cdot\text{s}^{-1}$ ) for each cluster investigated in the present study of LAS-SA-A system

| Collisions                                 | $\beta$ , $\text{cm}^3\cdot\text{s}^{-1}$ |                        |                        |                        |
|--------------------------------------------|-------------------------------------------|------------------------|------------------------|------------------------|
|                                            | 298.15 K                                  | 278.15 K               | 258.15 K               | 238.15 K               |
| SA + A                                     | $1.64 \times 10^{-10}$                    | $1.53 \times 10^{-10}$ | $1.42 \times 10^{-10}$ | $1.31 \times 10^{-10}$ |
| SA + LAS                                   | $8.85 \times 10^{-11}$                    | $8.01 \times 10^{-11}$ | $7.43 \times 10^{-11}$ | $6.85 \times 10^{-11}$ |
| LAS + A                                    | $2.67 \times 10^{-10}$                    | $2.49 \times 10^{-10}$ | $2.31 \times 10^{-10}$ | $2.13 \times 10^{-10}$ |
| SA + SA                                    | $6.76 \times 10^{-11}$                    | $6.30 \times 10^{-11}$ | $5.85 \times 10^{-11}$ | $5.40 \times 10^{-11}$ |
| LAS + LAS                                  | $9.23 \times 10^{-11}$                    | $8.61 \times 10^{-11}$ | $7.99 \times 10^{-11}$ | $7.37 \times 10^{-11}$ |
| (SA) <sub>2</sub> + A                      | $2.78 \times 10^{-10}$                    | $2.60 \times 10^{-10}$ | $2.41 \times 10^{-10}$ | $2.22 \times 10^{-10}$ |
| SA·A + SA                                  | $8.91 \times 10^{-11}$                    | $8.31 \times 10^{-11}$ | $7.71 \times 10^{-11}$ | $7.11 \times 10^{-11}$ |
| (SA) <sub>2</sub> ·A + A                   | $2.95 \times 10^{-10}$                    | $2.76 \times 10^{-10}$ | $2.56 \times 10^{-10}$ | $2.36 \times 10^{-10}$ |
| (LAS) <sub>2</sub> + A                     | $4.80 \times 10^{-10}$                    | $4.48 \times 10^{-10}$ | $4.15 \times 10^{-10}$ | $3.83 \times 10^{-10}$ |
| LAS·A + LAS                                | $1.11 \times 10^{-10}$                    | $1.03 \times 10^{-10}$ | $9.60 \times 10^{-11}$ | $8.86 \times 10^{-11}$ |
| (LAS) <sub>2</sub> ·A + A                  | $3.39 \times 10^{-10}$                    | $3.16 \times 10^{-10}$ | $2.93 \times 10^{-11}$ | $2.71 \times 10^{-11}$ |
| (SA) <sub>2</sub> + LAS                    | $8.95 \times 10^{-11}$                    | $8.35 \times 10^{-11}$ | $7.75 \times 10^{-11}$ | $7.15 \times 10^{-11}$ |
| SA·LAS + SA                                | $1.07 \times 10^{-10}$                    | $9.99 \times 10^{-11}$ | $9.27 \times 10^{-11}$ | $8.55 \times 10^{-11}$ |
| (LAS) <sub>2</sub> + SA                    | $1.24 \times 10^{-10}$                    | $1.15 \times 10^{-10}$ | $1.07 \times 10^{-10}$ | $9.87 \times 10^{-11}$ |
| SA·LAS + LAS                               | $1.02 \times 10^{-10}$                    | $9.54 \times 10^{-11}$ | $8.86 \times 10^{-11}$ | $8.17 \times 10^{-11}$ |
| (SA) <sub>2</sub> + SA                     | $8.56 \times 10^{-11}$                    | $7.98 \times 10^{-11}$ | $7.41 \times 10^{-11}$ | $6.83 \times 10^{-11}$ |
| (LAS) <sub>2</sub> + LAS                   | $1.12 \times 10^{-10}$                    | $1.04 \times 10^{-10}$ | $9.66 \times 10^{-11}$ | $8.91 \times 10^{-11}$ |
| SA + (SA) <sub>2</sub> ·A                  | $8.83 \times 10^{-11}$                    | $8.23 \times 10^{-11}$ | $7.64 \times 10^{-11}$ | $7.05 \times 10^{-11}$ |
| (SA) <sub>3</sub> + A                      | $3.98 \times 10^{-10}$                    | $3.71 \times 10^{-10}$ | $3.45 \times 10^{-10}$ | $3.18 \times 10^{-10}$ |
| (SA) <sub>2</sub> ·(A) <sub>2</sub> + SA   | $9.24 \times 10^{-11}$                    | $8.62 \times 10^{-11}$ | $8.00 \times 10^{-11}$ | $7.38 \times 10^{-11}$ |
| (SA) <sub>3</sub> ·A + A                   | $3.16 \times 10^{-10}$                    | $2.95 \times 10^{-10}$ | $2.74 \times 10^{-10}$ | $2.52 \times 10^{-10}$ |
| (SA) <sub>3</sub> ·(A) <sub>2</sub> + A    | $4.16 \times 10^{-10}$                    | $3.88 \times 10^{-10}$ | $3.60 \times 10^{-10}$ | $3.32 \times 10^{-10}$ |
| (LAS) <sub>2</sub> ·A + LAS                | $8.42 \times 10^{-11}$                    | $7.85 \times 10^{-11}$ | $7.29 \times 10^{-11}$ | $6.72 \times 10^{-11}$ |
| (LAS) <sub>3</sub> + A                     | $4.92 \times 10^{-10}$                    | $4.59 \times 10^{-10}$ | $4.26 \times 10^{-10}$ | $3.93 \times 10^{-10}$ |
| (LAS) <sub>2</sub> ·(A) <sub>2</sub> + LAS | $1.32 \times 10^{-10}$                    | $1.23 \times 10^{-10}$ | $1.14 \times 10^{-10}$ | $1.06 \times 10^{-10}$ |
| (LAS) <sub>3</sub> ·A + A                  | $4.94 \times 10^{-10}$                    | $4.61 \times 10^{-10}$ | $4.28 \times 10^{-10}$ | $3.95 \times 10^{-10}$ |
| (LAS) <sub>3</sub> ·(A) <sub>2</sub> + A   | $4.89 \times 10^{-10}$                    | $4.57 \times 10^{-10}$ | $4.24 \times 10^{-10}$ | $3.91 \times 10^{-10}$ |
| LAS·A + SA                                 | $1.09 \times 10^{-10}$                    | $1.02 \times 10^{-10}$ | $9.47 \times 10^{-11}$ | $8.73 \times 10^{-11}$ |
| SA·A + LAS                                 | $1.03 \times 10^{-10}$                    | $9.96 \times 10^{-11}$ | $8.94 \times 10^{-11}$ | $8.42 \times 10^{-11}$ |
| SA·LAS + A                                 | $3.89 \times 10^{-10}$                    | $3.63 \times 10^{-10}$ | $3.37 \times 10^{-10}$ | $3.11 \times 10^{-10}$ |

|                                    |                        |                        |                        |                        |
|------------------------------------|------------------------|------------------------|------------------------|------------------------|
| $SA \cdot LAS \cdot A + A$         | $3.28 \times 10^{-10}$ | $3.06 \times 10^{-10}$ | $2.84 \times 10^{-10}$ | $2.62 \times 10^{-10}$ |
| $SA \cdot LAS \cdot A + SA$        | $9.06 \times 10^{-11}$ | $8.45 \times 10^{-11}$ | $7.84 \times 10^{-11}$ | $7.23 \times 10^{-11}$ |
| $(SA)_2 \cdot A + LAS$             | $9.05 \times 10^{-11}$ | $8.44 \times 10^{-11}$ | $7.83 \times 10^{-11}$ | $7.22 \times 10^{-11}$ |
| $(SA)_2 \cdot LAS + A$             | $4.28 \times 10^{-10}$ | $3.99 \times 10^{-10}$ | $3.70 \times 10^{-10}$ | $3.42 \times 10^{-10}$ |
| $SA \cdot LAS \cdot (A)_2 + SA$    | $1.03 \times 10^{-11}$ | $9.58 \times 10^{-12}$ | $8.89 \times 10^{-12}$ | $8.20 \times 10^{-12}$ |
| $(SA)_2 \cdot (A)_2 + LAS$         | $9.27 \times 10^{-11}$ | $8.64 \times 10^{-11}$ | $8.02 \times 10^{-11}$ | $7.40 \times 10^{-11}$ |
| $(SA)_2 \cdot LAS \cdot A + A$     | $4.35 \times 10^{-10}$ | $4.06 \times 10^{-10}$ | $3.77 \times 10^{-10}$ | $3.48 \times 10^{-10}$ |
| $(SA)_2 \cdot LAS \cdot (A)_2 + A$ | $5.23 \times 10^{-10}$ | $4.88 \times 10^{-10}$ | $4.53 \times 10^{-10}$ | $4.18 \times 10^{-10}$ |
| $(LAS)_2 \cdot A + SA$             | $8.95 \times 10^{-11}$ | $8.35 \times 10^{-11}$ | $7.75 \times 10^{-11}$ | $7.15 \times 10^{-11}$ |
| $SA \cdot LAS \cdot A + LAS$       | $8.80 \times 10^{-11}$ | $8.21 \times 10^{-11}$ | $7.62 \times 10^{-11}$ | $7.03 \times 10^{-11}$ |
| $SA \cdot (LAS)_2 + A$             | $3.82 \times 10^{-10}$ | $3.56 \times 10^{-10}$ | $3.31 \times 10^{-10}$ | $3.05 \times 10^{-10}$ |
| $(LAS)_2 \cdot (A)_2 + SA$         | $1.52 \times 10^{-10}$ | $1.42 \times 10^{-10}$ | $1.32 \times 10^{-10}$ | $1.22 \times 10^{-10}$ |
| $SA \cdot LAS \cdot (A)_2 + LAS$   | $9.96 \times 10^{-11}$ | $9.04 \times 10^{-11}$ | $8.39 \times 10^{-11}$ | $7.74 \times 10^{-11}$ |
| $SA \cdot (LAS)_2 \cdot A + A$     | $4.20 \times 10^{-10}$ | $3.92 \times 10^{-10}$ | $3.64 \times 10^{-10}$ | $3.36 \times 10^{-10}$ |
| $SA \cdot (LAS)_2 \cdot (A)_2 + A$ | $6.28 \times 10^{-10}$ | $5.86 \times 10^{-10}$ | $5.44 \times 10^{-10}$ | $5.02 \times 10^{-10}$ |

---

**Table S9** Evaporation rates ( $\text{s}^{-1}$ ) of the studied clusters in LAS-SA-A system at different temperatures of 298.15, 278.15, 258.15 and 238.15 K

| Evaporation pathways                                                                                              | 298.15 K              | 278.15 K              | 258.15 K              | 238.15 K              |
|-------------------------------------------------------------------------------------------------------------------|-----------------------|-----------------------|-----------------------|-----------------------|
| $(\text{SA})_2 \rightarrow \text{SA} + \text{SA}$                                                                 | $2.03 \times 10^3$    | $2.30 \times 10^2$    | $1.84 \times 10^1$    | $9.67 \times 10^{-1}$ |
| $(\text{SA})_3 \rightarrow (\text{SA})_2 + \text{SA}$                                                             | $4.83 \times 10^5$    | $5.76 \times 10^4$    | $4.91 \times 10^3$    | $2.76 \times 10^2$    |
| $(\text{SA})_1 \cdot (\text{A})_1 \rightarrow \text{SA} + \text{A}$                                               | $2.37 \times 10^5$    | $3.73 \times 10^4$    | $4.42 \times 10^3$    | $3.65 \times 10^2$    |
| $(\text{SA})_2 \cdot (\text{A})_1 \rightarrow (\text{SA})_1 \cdot (\text{A})_1 + \text{SA}$                       | $1.47 \times 10^{-2}$ | $4.67 \times 10^{-4}$ | $8.68 \times 10^{-6}$ | $8.28 \times 10^{-8}$ |
| $(\text{SA})_2 \cdot (\text{A})_1 \rightarrow \text{A} + (\text{SA})_2$                                           | $2.20 \times 10^0$    | $9.76 \times 10^{-2}$ | $2.67 \times 10^{-3}$ | $4.02 \times 10^{-5}$ |
| $(\text{SA})_3 \cdot (\text{A})_1 \rightarrow (\text{SA})_2 \cdot (\text{A})_1 + \text{SA}$                       | $8.84 \times 10^3$    | $8.11 \times 10^2$    | $5.09 \times 10^1$    | $1.99 \times 10^0$    |
| $(\text{SA})_3 \cdot (\text{A})_1 \rightarrow \text{A} + (\text{SA})_3$                                           | $5.57 \times 10^{-2}$ | $1.90 \times 10^{-3}$ | $3.84 \times 10^{-5}$ | $4.03 \times 10^{-7}$ |
| $(\text{SA})_2 \cdot (\text{A})_2 \rightarrow (\text{SA})_2 \cdot (\text{A})_1 + \text{A}$                        | $1.20 \times 10^6$    | $1.80 \times 10^5$    | $2.01 \times 10^4$    | $1.55 \times 10^3$    |
| $(\text{SA})_3 \cdot (\text{A})_2 \rightarrow (\text{SA})_2 \cdot (\text{A})_2 + \text{SA}$                       | $8.18 \times 10^{-3}$ | $2.87 \times 10^{-4}$ | $5.95 \times 10^{-6}$ | $6.40 \times 10^{-8}$ |
| $(\text{SA})_3 \cdot (\text{A})_2 \rightarrow (\text{SA})_3 \cdot (\text{A})_1 + \text{A}$                        | $1.14 \times 10^0$    | $6.51 \times 10^{-2}$ | $2.40 \times 10^{-3}$ | $5.07 \times 10^{-5}$ |
| $(\text{SA})_3 \cdot (\text{A})_3 \rightarrow (\text{SA})_3 \cdot (\text{A})_2 + \text{A}$                        | $4.94 \times 10^2$    | $3.28 \times 10^1$    | $1.42 \times 10^0$    | $3.61 \times 10^{-2}$ |
| $(\text{SA})_1 \cdot (\text{LAS})_1 \rightarrow \text{SA} + \text{LAS}$                                           | $1.18 \times 10^4$    | $1.16 \times 10^3$    | $7.99 \times 10^1$    | $3.49 \times 10^0$    |
| $(\text{SA})_2 \cdot (\text{LAS})_1 \rightarrow (\text{SA})_1 \cdot (\text{LAS})_1 + \text{SA}$                   | $2.21 \times 10^7$    | $3.01 \times 10^6$    | $3.01 \times 10^5$    | $2.03 \times 10^4$    |
| $(\text{SA})_2 \cdot (\text{LAS})_1 \rightarrow \text{LAS} + (\text{SA})_2$                                       | $8.45 \times 10^7$    | $1.00 \times 10^7$    | $8.57 \times 10^5$    | $4.84 \times 10^4$    |
| $(\text{LAS})_1 \cdot (\text{A})_1 \rightarrow \text{LAS} + \text{A}$                                             | $9.64 \times 10^4$    | $1.19 \times 10^4$    | $1.07 \times 10^3$    | $6.39 \times 10^1$    |
| $(\text{SA})_1 \cdot (\text{LAS})_1 \cdot (\text{A})_1 \rightarrow \text{SA} + (\text{LAS})_1 \cdot (\text{A})_1$ | $6.28 \times 10^1$    | $2.01 \times 10^{-2}$ | $3.75 \times 10^{-4}$ | $3.60 \times 10^{-6}$ |

Continued table

| Evaporation pathways                                                                                                                  | 298.15 K              | 278.15 K              | 258.15 K               | 238.15 K               |
|---------------------------------------------------------------------------------------------------------------------------------------|-----------------------|-----------------------|------------------------|------------------------|
| $(\text{SA})_1 \cdot (\text{LAS})_1 \cdot (\text{A})_1 \rightarrow \text{A} + (\text{SA})_1 \cdot (\text{LAS})_1$                     | $5.87 \times 10^0$    | $2.35 \times 10^{-1}$ | $5.73 \times 10^{-3}$  | $7.52 \times 10^{-5}$  |
| $(\text{SA})_1 \cdot (\text{LAS})_1 \cdot (\text{A})_1 \rightarrow \text{LAS} + (\text{SA})_1 \cdot (\text{A})_1$                     | $1.48 \times 10^{-1}$ | $3.72 \times 10^{-3}$ | $5.26 \times 10^{-5}$  | $3.66 \times 10^{-7}$  |
| $(\text{SA})_2 \cdot (\text{LAS})_1 \cdot (\text{A})_1 \rightarrow \text{SA} + (\text{SA})_1 \cdot (\text{A})_1 \cdot (\text{LAS})_1$ | $3.02 \times 10^0$    | $2.22 \times 10^{-1}$ | $1.07 \times 10^{-2}$  | $3.10 \times 10^{-4}$  |
| $(\text{SA})_2 \cdot (\text{LAS})_1 \cdot (\text{A})_1 \rightarrow \text{A} + (\text{SA})_2 \cdot (\text{LAS})_1$                     | $1.04 \times 10^{-6}$ | $2.24 \times 10^{-8}$ | $2.66 \times 10^{-10}$ | $1.49 \times 10^{-12}$ |
| $(\text{SA})_2 \cdot (\text{LAS})_1 \cdot (\text{A})_1 \rightarrow \text{LAS} + (\text{SA})_2 \cdot (\text{A})_1$                     | $2.64 \times 10^1$    | $1.52 \times 10^0$    | $5.60 \times 10^{-2}$  | $1.18 \times 10^{-3}$  |
| $(\text{SA})_1 \cdot (\text{LAS})_1 \cdot (\text{A})_2 \rightarrow \text{A} + (\text{SA})_1 \cdot (\text{LAS})_1 \cdot (\text{A})_1$  | $1.88 \times 10^2$    | $1.95 \times 10^1$    | $1.41 \times 10^0$     | $6.54 \times 10^{-2}$  |
| $(\text{SA})_2 \cdot (\text{LAS})_1 \cdot (\text{A})_2 \rightarrow \text{SA} + (\text{SA})_1 \cdot (\text{LAS})_1 \cdot (\text{A})_2$ | $2.68 \times 10^2$    | $1.60 \times 10^1$    | $6.16 \times 10^{-1}$  | $1.36 \times 10^{-2}$  |
| $(\text{SA})_2 \cdot (\text{LAS})_1 \cdot (\text{A})_2 \rightarrow \text{A} + (\text{SA})_2 \cdot (\text{LAS})_1 \cdot (\text{A})_1$  | $1.95 \times 10^4$    | $1.65 \times 10^3$    | $9.52 \times 10^1$     | $3.37 \times 10^0$     |
| $(\text{SA})_2 \cdot (\text{LAS})_1 \cdot (\text{A})_2 \rightarrow \text{LAS} + (\text{SA})_2 \cdot (\text{A})_2$                     | $2.98 \times 10^{-1}$ | $9.70 \times 10^{-3}$ | $1.85 \times 10^{-4}$  | $1.79 \times 10^{-6}$  |
| $(\text{SA})_2 \cdot (\text{LAS})_1 \cdot (\text{A})_3 \rightarrow \text{A} + (\text{SA})_2 \cdot (\text{LAS})_1 \cdot (\text{A})_2$  | $2.39 \times 10^1$    | $1.43 \times 10^0$    | $5.57 \times 10^{-2}$  | $1.26 \times 10^{-3}$  |
| $(\text{LAS})_2 \rightarrow \text{LAS} + \text{LAS}$                                                                                  | $2.84 \times 10^6$    | $3.83 \times 10^5$    | $3.78 \times 10^4$     | $2.51 \times 10^3$     |
| $(\text{SA})_1 \cdot (\text{LAS})_2 \rightarrow \text{SA} + (\text{LAS})_2$                                                           | $1.71 \times 10^7$    | $1.79 \times 10^6$    | $1.30 \times 10^5$     | $6.14 \times 10^3$     |
| $(\text{SA})_1 \cdot (\text{LAS})_2 \rightarrow \text{LAS} + (\text{SA})_1 \cdot (\text{LAS})_1$                                      | $3.18 \times 10^9$    | $4.53 \times 10^8$    | $4.76 \times 10^7$     | $3.40 \times 10^6$     |
| $(\text{LAS})_2 \cdot (\text{A})_1 \rightarrow \text{A} + (\text{LAS})_2$                                                             | $1.55 \times 10^{-3}$ | $2.99 \times 10^{-5}$ | $3.14 \times 10^{-7}$  | $1.54 \times 10^{-9}$  |
| $(\text{LAS})_2 \cdot (\text{A})_1 \rightarrow \text{LAS} + (\text{LAS})_1 \cdot (\text{A})_1$                                        | $3.06 \times 10^{-2}$ | $6.43 \times 10^{-4}$ | $7.44 \times 10^{-6}$  | $4.06 \times 10^{-8}$  |
| $(\text{SA})_1 \cdot (\text{LAS})_2 \cdot (\text{A})_1 \rightarrow \text{SA} + (\text{LAS})_2 \cdot (\text{A})_1$                     | $2.29 \times 10^1$    | $1.34 \times 10^0$    | $4.99 \times 10^{-2}$  | $1.06 \times 10^{-3}$  |

Continued table

| Evaporation pathways                                                                                                                   | 298.15 K               | 278.15 K               | 258.15 K               | 238.15 K               |
|----------------------------------------------------------------------------------------------------------------------------------------|------------------------|------------------------|------------------------|------------------------|
| $(\text{SA})_1 \cdot (\text{LAS})_2 \cdot (\text{A})_1 \rightarrow \text{A} + (\text{SA})_1 \cdot (\text{LAS})_2$                      | $2.28 \times 10^{-9}$  | $2.46 \times 10^{-11}$ | $1.32 \times 10^{-13}$ | $2.94 \times 10^{-16}$ |
| $(\text{SA})_1 \cdot (\text{LAS})_2 \cdot (\text{A})_1 \rightarrow \text{LAS} + (\text{SA})_1 \cdot (\text{LAS})_1 \cdot (\text{A})_1$ | $1.08 \times 10^0$     | $4.16 \times 10^{-2}$  | $9.59 \times 10^{-4}$  | $1.17 \times 10^{-5}$  |
| $(\text{LAS})_2 \cdot (\text{A})_2 \rightarrow \text{A} + (\text{LAS})_2 \cdot (\text{A})_1$                                           | $1.28 \times 10^2$     | $1.34 \times 10^1$     | $9.84 \times 10^{-1}$  | $4.61 \times 10^{-2}$  |
| $(\text{SA})_1 \cdot (\text{LAS})_2 \cdot (\text{A})_2 \rightarrow \text{SA} + (\text{LAS})_2 \cdot (\text{A})_2$                      | $1.12 \times 10^5$     | $8.96 \times 10^3$     | $4.82 \times 10^2$     | $1.59 \times 10^1$     |
| $(\text{SA})_1 \cdot (\text{LAS})_2 \cdot (\text{A})_2 \rightarrow \text{A} + (\text{SA})_1 \cdot (\text{LAS})_2 \cdot (\text{A})_1$   | $4.56 \times 10^5$     | $6.54 \times 10^4$     | $6.93 \times 10^3$     | $5.01 \times 10^2$     |
| $(\text{SA})_1 \cdot (\text{LAS})_2 \cdot (\text{A})_2 \rightarrow \text{LAS} + (\text{SA})_1 \cdot (\text{LAS})_1 \cdot (\text{A})_2$ | $2.26 \times 10^3$     | $1.20 \times 10^2$     | $4.04 \times 10^0$     | $7.66 \times 10^{-2}$  |
| $(\text{SA})_1 \cdot (\text{LAS})_2 \cdot (\text{A})_3 \rightarrow \text{A} + (\text{SA})_1 \cdot (\text{LAS})_2 \cdot (\text{A})_2$   | $2.79 \times 10^2$     | $1.99 \times 10^1$     | $9.47 \times 10^{-1}$  | $2.70 \times 10^{-2}$  |
| $(\text{LAS})_3 \rightarrow (\text{LAS})_2 + \text{LAS}$                                                                               | $5.33 \times 10^8$     | $7.62 \times 10^7$     | $8.00 \times 10^6$     | $5.72 \times 10^5$     |
| $(\text{LAS})_3 \cdot (\text{A})_1 \rightarrow \text{A} + (\text{LAS})_3$                                                              | $3.74 \times 10^{-14}$ | $1.22 \times 10^{-16}$ | $1.66 \times 10^{-19}$ | $7.49 \times 10^{-23}$ |
| $(\text{LAS})_3 \cdot (\text{A})_1 \rightarrow \text{LAS} + (\text{LAS})_2 \cdot (\text{A})_1$                                         | $9.44 \times 10^{-3}$  | $2.29 \times 10^{-4}$  | $3.11 \times 10^{-6}$  | $2.04 \times 10^{-8}$  |
| $(\text{LAS})_3 \cdot (\text{A})_2 \rightarrow \text{A} + (\text{LAS})_3 \cdot (\text{A})_1$                                           | $6.92 \times 10^7$     | $1.93 \times 10^7$     | $4.38 \times 10^6$     | $7.74 \times 10^5$     |
| $(\text{LAS})_3 \cdot (\text{A})_2 \rightarrow \text{LAS} + (\text{LAS})_2 \cdot (\text{A})_2$                                         | $5.51 \times 10^3$     | $3.55 \times 10^2$     | $1.49 \times 10^1$     | $3.69 \times 10^{-1}$  |
| $(\text{LAS})_3 \cdot (\text{A})_3 \rightarrow \text{A} + (\text{LAS})_3 \cdot (\text{A})_2$                                           | $3.14 \times 10^{-3}$  | $8.64 \times 10^{-5}$  | $1.35 \times 10^{-6}$  | $1.05 \times 10^{-8}$  |

**Table S10** Total evaporation coefficients ( $\sum \gamma$ ,  $s^{-1}$ ) for each cluster analyzed in the present study of LAS-SA-A system

| Clusters                                 | $\sum \gamma$ , $s^{-1}$ |                       |                        |                        |
|------------------------------------------|--------------------------|-----------------------|------------------------|------------------------|
|                                          | 298.15 K                 | 278.15 K              | 258.15 K               | 238.15 K               |
| SA·A                                     | $2.37 \times 10^5$       | $3.73 \times 10^4$    | $4.42 \times 10^3$     | $3.65 \times 10^2$     |
| SA·LAS                                   | $1.18 \times 10^4$       | $1.16 \times 10^3$    | $7.99 \times 10^1$     | $3.49 \times 10^0$     |
| A·LAS                                    | $9.64 \times 10^4$       | $1.19 \times 10^4$    | $1.07 \times 10^3$     | $6.39 \times 10^1$     |
| (SA) <sub>2</sub>                        | $2.03 \times 10^3$       | $2.29 \times 10^2$    | $1.84 \times 10^1$     | $9.67 \times 10^{-1}$  |
| (LAS) <sub>2</sub>                       | $2.84 \times 10^7$       | $3.82 \times 10^6$    | $3.78 \times 10^5$     | $2.51 \times 10^4$     |
| (SA) <sub>2</sub> ·A                     | $2.21 \times 10^0$       | $9.80 \times 10^{-2}$ | $2.68 \times 10^{-3}$  | $4.03 \times 10^{-5}$  |
| (SA) <sub>2</sub> ·(A) <sub>2</sub>      | $1.90 \times 10^0$       | $1.13 \times 10^{-1}$ | $4.33 \times 10^{-3}$  | $9.50 \times 10^{-5}$  |
| A·(LAS) <sub>2</sub>                     | $3.21 \times 10^{-2}$    | $6.73 \times 10^{-4}$ | $7.75 \times 10^{-6}$  | $4.22 \times 10^{-8}$  |
| (A) <sub>2</sub> ·(LAS) <sub>2</sub>     | $1.28 \times 10^2$       | $1.34 \times 10^1$    | $9.84 \times 10^{-1}$  | $4.61 \times 10^{-2}$  |
| (SA) <sub>2</sub> ·LAS                   | $1.07 \times 10^8$       | $1.31 \times 10^7$    | $1.16 \times 10^6$     | $6.87 \times 10^4$     |
| SA·(LAS) <sub>2</sub>                    | $3.20 \times 10^9$       | $4.54 \times 10^8$    | $4.77 \times 10^7$     | $3.41 \times 10^6$     |
| (SA) <sub>3</sub>                        | $4.83 \times 10^5$       | $5.76 \times 10^4$    | $4.91 \times 10^3$     | $2.76 \times 10^2$     |
| (LAS) <sub>3</sub>                       | $5.33 \times 10^8$       | $7.62 \times 10^7$    | $8.00 \times 10^6$     | $5.72 \times 10^5$     |
| (SA) <sub>3</sub> ·A                     | $8.84 \times 10^3$       | $8.11 \times 10^2$    | $5.09 \times 10^1$     | $1.99 \times 10^0$     |
| (SA) <sub>3</sub> ·(A) <sub>2</sub>      | $1.14 \times 10^0$       | $6.54 \times 10^{-2}$ | $2.40 \times 10^{-3}$  | $5.08 \times 10^{-5}$  |
| (SA) <sub>3</sub> ·(A) <sub>3</sub>      | $4.94 \times 10^2$       | $3.28 \times 10^1$    | $1.42 \times 10^0$     | $3.61 \times 10^{-2}$  |
| A·(LAS) <sub>3</sub>                     | $9.44 \times 10^{-3}$    | $2.29 \times 10^{-4}$ | $3.11 \times 10^{-6}$  | $2.04 \times 10^{-8}$  |
| (A) <sub>2</sub> ·(LAS) <sub>3</sub>     | $6.92 \times 10^{-5}$    | $3.49 \times 10^{-6}$ | $4.38 \times 10^{-7}$  | $7.74 \times 10^{-8}$  |
| (A) <sub>3</sub> ·(LAS) <sub>3</sub>     | $3.14 \times 10^{-6}$    | $8.64 \times 10^{-8}$ | $1.35 \times 10^{-9}$  | $1.05 \times 10^{-11}$ |
| SA·A·LAS                                 | $6.64 \times 10^0$       | $2.58 \times 10^{-1}$ | $6.16 \times 10^{-3}$  | $7.92 \times 10^5$     |
| SA·(A) <sub>2</sub> ·LAS                 | $1.88 \times 10^2$       | $1.95 \times 10^1$    | $1.41 \times 10^0$     | $6.54 \times 10^{-2}$  |
| SA <sub>2</sub> ·A·LAS                   | $2.94 \times 10^1$       | $1.74 \times 10^0$    | $6.68 \times 10S^{-2}$ | $1.49 \times 10^{-3}$  |
| (SA) <sub>2</sub> ·(A) <sub>2</sub> ·LAS | $1.98 \times 10^4$       | $1.67 \times 10^3$    | $9.58 \times 10^1$     | $3.39 \times 10^0$     |
| (SA) <sub>2</sub> ·(A) <sub>3</sub> ·LAS | $4.79 \times 10^{-7}$    | $1.99 \times 10^{-8}$ | $1.07 \times 10^{-9}$  | $2.34 \times 10^{-11}$ |
| SA·A·(LAS) <sub>2</sub>                  | $2.40 \times 10^1$       | $1.37 \times 10^0$    | $5.08 \times 10^{-2}$  | $1.08 \times 10^{-3}$  |
| SA·(A) <sub>2</sub> ·(LAS) <sub>2</sub>  | $5.71 \times 10^5$       | $7.45 \times 10^4$    | $7.42 \times 10^3$     | $5.16 \times 10^2$     |
| SA·(A) <sub>3</sub> ·(LAS) <sub>2</sub>  | $2.79 \times 10^2$       | $1.99 \times 10^1$    | $9.47 \times 10^{-1}$  | $2.70 \times 10^{-2}$  |

**Table S11** Ratios ( $\beta C/\Sigma\gamma$ ) between monomer molecule collisions and evaporation coefficients for each cluster involving LAS in the present study.  $[\text{SA}] = 1.0 \times 10^7 \text{ molecules}\cdot\text{cm}^{-3}$ ,  $[\text{A}] = 1.0 \times 10^{10} \text{ molecules}\cdot\text{cm}^{-3}$ ,  $[\text{LAS}] = 1.0 \times 10^{10} \text{ molecules}\cdot\text{cm}^{-3}$

| Clusters                                     | $\beta C/\Sigma\gamma$ |                        |                        |                        |
|----------------------------------------------|------------------------|------------------------|------------------------|------------------------|
|                                              | 298.15 K               | 278.15 K               | 258.15 K               | 238.15 K               |
| Collision with SA monomer: $C = [\text{SA}]$ |                        |                        |                        |                        |
| SA·A                                         | $3.76 \times 10^{-15}$ | $2.23 \times 10^{-14}$ | $1.75 \times 10^{-13}$ | $1.95 \times 10^{-12}$ |
| SA·LAS                                       | $9.08 \times 10^{-14}$ | $8.59 \times 10^{-13}$ | $1.16 \times 10^{-11}$ | $2.45 \times 10^{-10}$ |
| A·LAS                                        | $1.13 \times 10^{-14}$ | $8.56 \times 10^{-14}$ | $8.86 \times 10^{-13}$ | $1.37 \times 10^{-11}$ |
| (SA) <sub>2</sub>                            | $4.22 \times 10^{-13}$ | $3.47 \times 10^{-12}$ | $4.02 \times 10^{-11}$ | $7.07 \times 10^{-10}$ |
| (LAS) <sub>2</sub>                           | $4.35 \times 10^{-16}$ | $3.01 \times 10^{-15}$ | $2.83 \times 10^{-14}$ | $3.92 \times 10^{-13}$ |
| (SA) <sub>2</sub> ·A                         | $3.99 \times 10^{-10}$ | $8.40 \times 10^{-9}$  | $2.85 \times 10^{-7}$  | $1.75 \times 10^{-5}$  |
| (SA) <sub>2</sub> ·(A) <sub>2</sub>          | $4.86 \times 10^{-10}$ | $7.60 \times 10^{-9}$  | $1.85 \times 10^{-7}$  | $7.77 \times 10^{-6}$  |
| A·(LAS) <sub>2</sub>                         | $2.78 \times 10^{-8}$  | $1.24 \times 10^{-6}$  | $9.99 \times 10^{-5}$  | $1.69 \times 10^{-2}$  |
| (A) <sub>2</sub> ·(LAS) <sub>2</sub>         | $1.19 \times 10^{-11}$ | $1.06 \times 10^{-10}$ | $1.34 \times 10^{-9}$  | $2.64 \times 10^{-8}$  |
| SA·A·LAS                                     | $1.36 \times 10^{-10}$ | $3.27 \times 10^{-9}$  | $1.27 \times 10^{-7}$  | $9.14 \times 10^{-6}$  |
| SA·(A) <sub>2</sub> ·LAS                     | $5.47 \times 10^{-12}$ | $4.91 \times 10^{-11}$ | $6.29 \times 10^{-10}$ | $1.25 \times 10^{-8}$  |
| Collision with A monomer: $C = [\text{A}]$   |                        |                        |                        |                        |
| SA·LAS                                       | $3.30 \times 10^{-11}$ | $3.12 \times 10^{-10}$ | $4.22 \times 10^{-9}$  | $8.89 \times 10^{-8}$  |
| (SA) <sub>2</sub>                            | $1.37 \times 10^{-10}$ | $1.13 \times 10^{-9}$  | $1.31 \times 10^{-8}$  | $2.30 \times 10^{-7}$  |
| (LAS) <sub>2</sub>                           | $1.69 \times 10^{-13}$ | $1.17 \times 10^{-12}$ | $1.10 \times 10^{-11}$ | $1.52 \times 10^{-10}$ |
| (SA) <sub>2</sub> ·A                         | $1.33 \times 10^{-7}$  | $2.81 \times 10^{-6}$  | $9.53 \times 10^{-5}$  | $5.86 \times 10^{-3}$  |
| A·(LAS) <sub>2</sub>                         | $1.05 \times 10^{-5}$  | $4.70 \times 10^{-4}$  | $3.79 \times 10^{-2}$  | $6.42 \times 10^0$     |
| (SA) <sub>2</sub> ·LAS                       | $4.01 \times 10^{-15}$ | $3.06 \times 10^{-14}$ | $3.20 \times 10^{-13}$ | $4.97 \times 10^{-12}$ |
| SA·(LAS) <sub>2</sub>                        | $1.19 \times 10^{-16}$ | $7.84 \times 10^{-16}$ | $6.93 \times 10^{-15}$ | $8.95 \times 10^{-14}$ |
| (SA) <sub>3</sub>                            | $8.23 \times 10^{-13}$ | $6.45 \times 10^{-12}$ | $7.02 \times 10^{-11}$ | $1.15 \times 10^{-9}$  |
| (LAS) <sub>3</sub>                           | $9.23 \times 10^{-16}$ | $6.03 \times 10^{-15}$ | $5.33 \times 10^{-14}$ | $6.88 \times 10^{-13}$ |
| (SA) <sub>3</sub> ·A                         | $3.57 \times 10^{-11}$ | $3.64 \times 10^{-10}$ | $5.38 \times 10^{-9}$  | $1.27 \times 10^{-7}$  |
| (SA) <sub>3</sub> ·(A) <sub>2</sub>          | $3.63 \times 10^{-7}$  | $5.93 \times 10^{-6}$  | $1.50 \times 10^{-4}$  | $6.54 \times 10^{-3}$  |
| A·(LAS) <sub>3</sub>                         | $5.23 \times 10^{-5}$  | $2.01 \times 10^{-3}$  | $1.37 \times 10^{-1}$  | $1.94 \times 10^1$     |
| (A) <sub>2</sub> ·(LAS) <sub>3</sub>         | $7.07 \times 10^{-15}$ | $2.37 \times 10^{-14}$ | $9.67 \times 10^{-14}$ | $5.05 \times 10^{-13}$ |
| SA·A·LAS                                     | $4.93 \times 10^{-8}$  | $1.18 \times 10^{-6}$  | $4.61 \times 10^{-5}$  | $3.31 \times 10^{-3}$  |

|                                                     |                        |                        |                        |                        |
|-----------------------------------------------------|------------------------|------------------------|------------------------|------------------------|
| $(\text{SA})_2 \cdot \text{A} \cdot \text{LAS}$     | $1.48 \times 10^{-8}$  | $2.33 \times 10^{-7}$  | $5.65 \times 10^{-6}$  | $2.33 \times 10^{-4}$  |
| $(\text{SA})_2 \cdot (\text{A})_2 \cdot \text{LAS}$ | $2.64 \times 10^{-11}$ | $2.92 \times 10^{-10}$ | $4.73 \times 10^{-9}$  | $1.23 \times 10^{-7}$  |
| $\text{SA} \cdot \text{A} \cdot (\text{LAS})_2$     | $1.75 \times 10^{-8}$  | $2.85 \times 10^{-7}$  | $7.16 \times 10^{-6}$  | $3.12 \times 10^{-4}$  |
| $\text{SA} \cdot (\text{A})_2 \cdot (\text{LAS})_2$ | $1.10 \times 10^{-12}$ | $7.86 \times 10^{-12}$ | $7.33 \times 10^{-11}$ | $9.71 \times 10^{-10}$ |

Collision with LAS monomer:  $C = [\text{LAS}]$

|                                                 |                        |                        |                        |                        |
|-------------------------------------------------|------------------------|------------------------|------------------------|------------------------|
| $\text{SA} \cdot \text{A}$                      | $4.36 \times 10^{-17}$ | $2.58 \times 10^{-16}$ | $2.02 \times 10^{-15}$ | $2.26 \times 10^{-14}$ |
| $\text{SA} \cdot \text{LAS}$                    | $8.68 \times 10^{-16}$ | $8.21 \times 10^{-15}$ | $1.11 \times 10^{-13}$ | $2.34 \times 10^{-12}$ |
| $\text{A} \cdot \text{LAS}$                     | $1.15 \times 10^{-16}$ | $8.68 \times 10^{-16}$ | $8.99 \times 10^{-15}$ | $1.38 \times 10^{-13}$ |
| $(\text{SA})_2$                                 | $4.41 \times 10^{-15}$ | $3.64 \times 10^{-14}$ | $4.20 \times 10^{-13}$ | $7.39 \times 10^{-12}$ |
| $(\text{LAS})_2$                                | $3.93 \times 10^{-18}$ | $2.72 \times 10^{-17}$ | $2.56 \times 10^{-16}$ | $3.54 \times 10^{-15}$ |
| $(\text{SA})_2 \cdot \text{A}$                  | $4.09 \times 10^{-12}$ | $8.61 \times 10^{-11}$ | $2.92 \times 10^{-9}$  | $1.79 \times 10^{-7}$  |
| $(\text{SA})_2 \cdot (\text{A})_2$              | $4.88 \times 10^{-12}$ | $7.63 \times 10^{-11}$ | $1.85 \times 10^{-9}$  | $7.79 \times 10^{-8}$  |
| $\text{A} \cdot (\text{LAS})_2$                 | $2.62 \times 10^{-10}$ | $1.17 \times 10^{-8}$  | $9.40 \times 10^{-7}$  | $1.59 \times 10^{-4}$  |
| $(\text{A})_2 \cdot (\text{LAS})_2$             | $1.03 \times 10^{-13}$ | $9.20 \times 10^{-13}$ | $1.16 \times 10^{-11}$ | $2.29 \times 10^{-10}$ |
| $\text{SA} \cdot \text{A} \cdot \text{LAS}$     | $1.32 \times 10^{-12}$ | $3.17 \times 10^{-11}$ | $1.24 \times 10^{-9}$  | $8.88 \times 10^{-8}$  |
| $\text{SA} \cdot (\text{A})_2 \cdot \text{LAS}$ | $5.17 \times 10^{-14}$ | $4.64 \times 10^{-13}$ | $5.94 \times 10^{-12}$ | $1.18 \times 10^{-10}$ |

---

Research has shown that it is important to consider the concentration of precursors when evaluating the cluster stability, because a larger concentration of precursors increases the collision probability for a cluster, resulting in higher stability of the cluster. Therefore, the ratio of the collision frequency to the total evaporation rate ( $\beta \cdot C / \sum \gamma$ , in Table S5) was investigated. The  $\beta \cdot C / \sum \gamma$  increases with the decrease of temperature, this indicates that the lower temperature is more LASvorable for the formation of clusters.



**Table S12** Formation rate  $J$  ( $\text{cm}^{-3} \text{ s}^{-1}$ ) of LAS at  $T = 238.15 \text{ K}$ , with  $[\text{SA}] = 10^6\text{-}10^8 \text{ molecules}\cdot\text{cm}^{-3}$ ,  $[\text{A}] = 10^7\text{-}10^{11} \text{ molecules}\cdot\text{cm}^{-3}$ , and  $[\text{LAS}] = 0, 10^4\text{-}10^7 \text{ molecules}\cdot\text{cm}^{-3}$ . SA, A and LAS denote sulfuric acid, ammonia and disulfuric acid, respectively.

| [SA]          | [A]             | [LAS] = 0              | [LAS] = $10^3$         | [LAS] = $10^4$         | [LAS] = $10^5$         | [LAS] = $10^6$        |
|---------------|-----------------|------------------------|------------------------|------------------------|------------------------|-----------------------|
| [SA] = $10^4$ | [A] = $10^7$    | $7.29 \times 10^{-15}$ | $2.44 \times 10^{-14}$ | $3.19 \times 10^{-13}$ | $1.79 \times 10^{-11}$ | $8.33 \times 10^{-9}$ |
| [SA] = $10^4$ | [A] = $10^8$    | $4.14 \times 10^{-12}$ | $1.93 \times 10^{-11}$ | $2.84 \times 10^{-10}$ | $1.59 \times 10^{-8}$  | $5.59 \times 10^{-6}$ |
| [SA] = $10^4$ | [A] = $10^9$    | $6.26 \times 10^{-10}$ | $3.31 \times 10^{-9}$  | $5.01 \times 10^{-8}$  | $2.81 \times 10^{-6}$  | $1.15 \times 10^{-3}$ |
| [SA] = $10^4$ | [A] = $10^{10}$ | $1.65 \times 10^{-8}$  | $4.15 \times 10^{-8}$  | $4.76 \times 10^{-7}$  | $4.41 \times 10^{-5}$  | $1.44 \times 10^{-1}$ |
| [SA] = $10^4$ | [A] = $10^{11}$ | $5.94 \times 10^{-8}$  | $1.56 \times 10^{-7}$  | $2.66 \times 10^{-6}$  | $4.72 \times 10^{-3}$  | $2.78 \times 10^1$    |
| [SA] = $10^5$ | [A] = $10^7$    | $7.36 \times 10^{-11}$ | $8.91 \times 10^{-11}$ | $2.42 \times 10^{-10}$ | $3.10 \times 10^{-9}$  | $1.47 \times 10^{-7}$ |
| [SA] = $10^5$ | [A] = $10^8$    | $4.16 \times 10^{-8}$  | $5.54 \times 10^{-8}$  | $1.91 \times 10^{-7}$  | $2.75 \times 10^{-6}$  | $1.28 \times 10^{-4}$ |
| [SA] = $10^5$ | [A] = $10^9$    | $6.24 \times 10^{-6}$  | $8.65 \times 10^{-6}$  | $3.25 \times 10^{-5}$  | $4.75 \times 10^{-4}$  | $2.06 \times 10^{-2}$ |
| [SA] = $10^5$ | [A] = $10^{10}$ | $1.63 \times 10^{-4}$  | $1.86 \times 10^{-4}$  | $4.06 \times 10^{-4}$  | $4.48 \times 10^{-3}$  | $3.52 \times 10^{-1}$ |
| [SA] = $10^5$ | [A] = $10^{11}$ | $5.85 \times 10^{-4}$  | $6.67 \times 10^{-4}$  | $1.52 \times 10^{-3}$  | $2.53 \times 10^{-2}$  | $3.07 \times 10^1$    |
| [SA] = $10^6$ | [A] = $10^7$    | $8.12 \times 10^{-7}$  | $8.26 \times 10^{-7}$  | $9.51 \times 10^{-7}$  | $2.30 \times 10^{-6}$  | $2.35 \times 10^{-5}$ |
| [SA] = $10^6$ | [A] = $10^8$    | $4.36 \times 10^{-4}$  | $4.48 \times 10^{-4}$  | $5.58 \times 10^{-4}$  | $1.75 \times 10^{-3}$  | $2.03 \times 10^{-2}$ |
| [SA] = $10^6$ | [A] = $10^9$    | $6.10 \times 10^{-2}$  | $6.30 \times 10^{-2}$  | $8.08 \times 10^{-2}$  | $2.70 \times 10^{-1}$  | $2.96 \times 10^0$    |
| [SA] = $10^6$ | [A] = $10^{10}$ | $1.48 \times 10^0$     | $1.50 \times 10^0$     | $1.65 \times 10^0$     | $3.25 \times 10^0$     | $2.56 \times 10^1$    |
| [SA] = $10^6$ | [A] = $10^{11}$ | $4.90 \times 10^0$     | $4.95 \times 10^0$     | $5.48 \times 10^0$     | $1.13 \times 10^1$     | $1.44 \times 10^2$    |
| [SA] = $10^7$ | [A] = $10^7$    | $1.48 \times 10^{-2}$  | $1.48 \times 10^{-2}$  | $1.48 \times 10^{-2}$  | $1.53 \times 10^{-2}$  | $1.95 \times 10^{-2}$ |
| [SA] = $10^7$ | [A] = $10^8$    | $5.23 \times 10^0$     | $5.24 \times 10^0$     | $5.29 \times 10^0$     | $5.76 \times 10^0$     | $1.02 \times 10^1$    |
| [SA] = $10^7$ | [A] = $10^9$    | $3.88 \times 10^2$     | $3.88 \times 10^2$     | $3.92 \times 10^2$     | $4.31 \times 10^2$     | $7.85 \times 10^2$    |
| [SA] = $10^7$ | [A] = $10^{10}$ | $3.81 \times 10^3$     | $3.82 \times 10^3$     | $3.83 \times 10^3$     | $3.97 \times 10^3$     | $5.35 \times 10^3$    |
| [SA] = $10^7$ | [A] = $10^{11}$ | $7.62 \times 10^3$     | $7.62 \times 10^3$     | $7.66 \times 10^3$     | $8.04 \times 10^3$     | $1.18 \times 10^4$    |

**Table S13** Formation rate  $J$  ( $\text{cm}^{-3} \text{ s}^{-1}$ ) of LAS at  $T = 258.15 \text{ K}$ , with  $[\text{SA}] = 10^6\text{-}10^8 \text{ molecules}\cdot\text{cm}^{-3}$ ,  $[\text{A}] = 10^7\text{-}10^{11} \text{ molecules}\cdot\text{cm}^{-3}$ , and  $[\text{LAS}] = 0, 10^4\text{-}10^7 \text{ molecules}\cdot\text{cm}^{-3}$ . SA, A and LAS represent sulfuric acid, ammonia and disulfuric acid, respectively.

| [SA]          | [A]             | [LAS] = 0              | [LAS] = $10^3$         | [LAS] = $10^4$         | [LAS] = $10^5$         | [LAS] = $10^6$         |
|---------------|-----------------|------------------------|------------------------|------------------------|------------------------|------------------------|
| [SA] = $10^4$ | [A] = $10^7$    | $4.70 \times 10^{-20}$ | $6.37 \times 10^{-20}$ | $3.62 \times 10^{-19}$ | $2.99 \times 10^{-16}$ | $2.16 \times 10^{-12}$ |
| [SA] = $10^4$ | [A] = $10^8$    | $4.68 \times 10^{-17}$ | $6.34 \times 10^{-17}$ | $3.59 \times 10^{-16}$ | $2.92 \times 10^{-13}$ | $2.12 \times 10^{-9}$  |
| [SA] = $10^4$ | [A] = $10^9$    | $4.42 \times 10^{-14}$ | $6.04 \times 10^{-14}$ | $3.40 \times 10^{-13}$ | $2.42 \times 10^{-10}$ | $1.71 \times 10^{-6}$  |
| [SA] = $10^4$ | [A] = $10^{10}$ | $2.79 \times 10^{-11}$ | $4.11 \times 10^{-11}$ | $2.60 \times 10^{-10}$ | $1.25 \times 10^{-7}$  | $8.41 \times 10^{-4}$  |
| [SA] = $10^4$ | [A] = $10^{11}$ | $3.77 \times 10^{-9}$  | $7.38 \times 10^{-9}$  | $7.42 \times 10^{-8}$  | $5.22 \times 10^{-5}$  | $3.50 \times 10^{-1}$  |
| [SA] = $10^5$ | [A] = $10^7$    | $4.73 \times 10^{-16}$ | $4.88 \times 10^{-16}$ | $6.39 \times 10^{-16}$ | $3.61 \times 10^{-15}$ | $2.38 \times 10^{-12}$ |
| [SA] = $10^5$ | [A] = $10^8$    | $4.70 \times 10^{-13}$ | $4.85 \times 10^{-13}$ | $6.36 \times 10^{-13}$ | $3.59 \times 10^{-12}$ | $2.32 \times 10^{-9}$  |
| [SA] = $10^5$ | [A] = $10^9$    | $4.44 \times 10^{-10}$ | $4.59 \times 10^{-10}$ | $6.06 \times 10^{-10}$ | $3.40 \times 10^{-9}$  | $1.92 \times 10^{-6}$  |
| [SA] = $10^5$ | [A] = $10^{10}$ | $2.78 \times 10^{-7}$  | $2.90 \times 10^{-7}$  | $4.09 \times 10^{-7}$  | $2.59 \times 10^{-6}$  | $1.01 \times 10^{-3}$  |
| [SA] = $10^5$ | [A] = $10^{11}$ | $3.73 \times 10^{-5}$  | $4.06 \times 10^{-5}$  | $7.31 \times 10^{-5}$  | $7.27 \times 10^{-4}$  | $4.16 \times 10^{-1}$  |
| [SA] = $10^6$ | [A] = $10^7$    | $4.95 \times 10^{-12}$ | $4.96 \times 10^{-12}$ | $5.10 \times 10^{-12}$ | $6.60 \times 10^{-12}$ | $3.57 \times 10^{-11}$ |
| [SA] = $10^6$ | [A] = $10^8$    | $4.91 \times 10^{-9}$  | $4.93 \times 10^{-9}$  | $5.06 \times 10^{-9}$  | $6.56 \times 10^{-9}$  | $3.54 \times 10^{-8}$  |
| [SA] = $10^6$ | [A] = $10^9$    | $4.59 \times 10^{-6}$  | $4.60 \times 10^{-6}$  | $4.74 \times 10^{-6}$  | $6.19 \times 10^{-6}$  | $3.35 \times 10^{-5}$  |
| [SA] = $10^6$ | [A] = $10^{10}$ | $2.69 \times 10^{-3}$  | $2.70 \times 10^{-3}$  | $2.81 \times 10^{-3}$  | $3.96 \times 10^{-3}$  | $2.49 \times 10^{-2}$  |
| [SA] = $10^6$ | [A] = $10^{11}$ | $3.37 \times 10^{-1}$  | $3.40 \times 10^{-1}$  | $3.67 \times 10^{-1}$  | $6.56 \times 10^{-1}$  | $5.92 \times 10^0$     |
| [SA] = $10^7$ | [A] = $10^7$    | $7.17 \times 10^{-8}$  | $7.17 \times 10^{-8}$  | $7.18 \times 10^{-8}$  | $7.30 \times 10^{-8}$  | $8.58 \times 10^{-8}$  |
| [SA] = $10^7$ | [A] = $10^8$    | $7.04 \times 10^{-5}$  | $7.04 \times 10^{-5}$  | $7.05 \times 10^{-5}$  | $7.16 \times 10^{-5}$  | $8.44 \times 10^{-5}$  |
| [SA] = $10^7$ | [A] = $10^9$    | $5.92 \times 10^{-2}$  | $5.92 \times 10^{-2}$  | $5.93 \times 10^{-2}$  | $6.04 \times 10^{-2}$  | $7.25 \times 10^{-2}$  |
| [SA] = $10^7$ | [A] = $10^{10}$ | $2.16 \times 10^1$     | $2.16 \times 10^1$     | $2.17 \times 10^1$     | $2.25 \times 10^1$     | $3.15 \times 10^1$     |
| [SA] = $10^7$ | [A] = $10^{11}$ | $1.40 \times 10^3$     | $1.40 \times 10^3$     | $1.41 \times 10^3$     | $1.49 \times 10^3$     | $2.26 \times 10^3$     |

**Table S14** Formation rate  $J$  ( $\text{cm}^{-3} \text{s}^{-1}$ ) of LAS at  $T = 278.15 \text{ K}$ , with  $[\text{SA}] = 10^6\text{-}10^8 \text{ molecules}\cdot\text{cm}^{-3}$ ,  $[\text{A}] = 10^7\text{-}10^{11} \text{ molecules}\cdot\text{cm}^{-3}$ , and  $[\text{LAS}] = 0, 10^4\text{-}10^7 \text{ molecules}\cdot\text{cm}^{-3}$ . SA, A and LAS denote sulfuric acid, ammonia and disulfuric acid, respectively.

| [SA]          | [A]             | [LAS] = 0              | [LAS] = $10^3$         | [LAS] = $10^4$         | [LAS] = $10^5$         | [LAS] = $10^6$         |
|---------------|-----------------|------------------------|------------------------|------------------------|------------------------|------------------------|
| [SA] = $10^4$ | [A] = $10^7$    | $2.64 \times 10^{-26}$ | $4.21 \times 10^{-26}$ | $4.46 \times 10^{-23}$ | $4.31 \times 10^{-19}$ | $3.47 \times 10^{-15}$ |
| [SA] = $10^4$ | [A] = $10^8$    | $2.64 \times 10^{-23}$ | $4.21 \times 10^{-23}$ | $4.46 \times 10^{-20}$ | $4.31 \times 10^{-16}$ | $3.47 \times 10^{-12}$ |
| [SA] = $10^4$ | [A] = $10^9$    | $2.64 \times 10^{-20}$ | $4.21 \times 10^{-20}$ | $4.49 \times 10^{-17}$ | $4.34 \times 10^{-13}$ | $3.50 \times 10^{-9}$  |
| [SA] = $10^4$ | [A] = $10^{10}$ | $2.64 \times 10^{-17}$ | $4.20 \times 10^{-17}$ | $4.67 \times 10^{-14}$ | $4.52 \times 10^{-10}$ | $3.64 \times 10^{-6}$  |
| [SA] = $10^4$ | [A] = $10^{11}$ | $2.60 \times 10^{-14}$ | $3.93 \times 10^{-14}$ | $3.83 \times 10^{-11}$ | $3.70 \times 10^{-7}$  | $2.98 \times 10^{-3}$  |
| [SA] = $10^5$ | [A] = $10^7$    | $2.64 \times 10^{-22}$ | $2.71 \times 10^{-22}$ | $4.21 \times 10^{-22}$ | $4.36 \times 10^{-19}$ | $3.47 \times 10^{-15}$ |
| [SA] = $10^5$ | [A] = $10^8$    | $2.64 \times 10^{-19}$ | $2.71 \times 10^{-19}$ | $4.21 \times 10^{-19}$ | $4.36 \times 10^{-16}$ | $3.48 \times 10^{-12}$ |
| [SA] = $10^5$ | [A] = $10^9$    | $2.64 \times 10^{-16}$ | $2.71 \times 10^{-16}$ | $4.21 \times 10^{-16}$ | $4.39 \times 10^{-13}$ | $3.50 \times 10^{-9}$  |
| [SA] = $10^5$ | [A] = $10^{10}$ | $2.64 \times 10^{-13}$ | $2.71 \times 10^{-13}$ | $4.20 \times 10^{-13}$ | $4.57 \times 10^{-10}$ | $3.63 \times 10^{-6}$  |
| [SA] = $10^5$ | [A] = $10^{11}$ | $2.60 \times 10^{-10}$ | $2.67 \times 10^{-10}$ | $3.93 \times 10^{-10}$ | $3.74 \times 10^{-7}$  | $2.98 \times 10^{-3}$  |
| [SA] = $10^6$ | [A] = $10^7$    | $2.65 \times 10^{-18}$ | $2.65 \times 10^{-18}$ | $2.72 \times 10^{-18}$ | $4.20 \times 10^{-18}$ | $3.53 \times 10^{-15}$ |
| [SA] = $10^6$ | [A] = $10^8$    | $2.65 \times 10^{-15}$ | $2.65 \times 10^{-15}$ | $2.72 \times 10^{-15}$ | $4.20 \times 10^{-15}$ | $3.53 \times 10^{-12}$ |
| [SA] = $10^6$ | [A] = $10^9$    | $2.65 \times 10^{-12}$ | $2.65 \times 10^{-12}$ | $2.72 \times 10^{-12}$ | $4.20 \times 10^{-12}$ | $3.55 \times 10^{-9}$  |
| [SA] = $10^6$ | [A] = $10^{10}$ | $2.64 \times 10^{-9}$  | $2.65 \times 10^{-9}$  | $2.72 \times 10^{-9}$  | $4.19 \times 10^{-9}$  | $3.69 \times 10^{-6}$  |
| [SA] = $10^6$ | [A] = $10^{11}$ | $2.60 \times 10^{-6}$  | $2.61 \times 10^{-6}$  | $2.67 \times 10^{-6}$  | $3.92 \times 10^{-6}$  | $3.04 \times 10^{-3}$  |
| [SA] = $10^7$ | [A] = $10^7$    | $2.71 \times 10^{-14}$ | $2.71 \times 10^{-14}$ | $2.71 \times 10^{-14}$ | $2.78 \times 10^{-14}$ | $4.17 \times 10^{-14}$ |
| [SA] = $10^7$ | [A] = $10^8$    | $2.71 \times 10^{-11}$ | $2.71 \times 10^{-11}$ | $2.71 \times 10^{-11}$ | $2.78 \times 10^{-11}$ | $4.17 \times 10^{-11}$ |
| [SA] = $10^7$ | [A] = $10^9$    | $2.71 \times 10^{-8}$  | $2.71 \times 10^{-8}$  | $2.71 \times 10^{-8}$  | $2.78 \times 10^{-8}$  | $4.17 \times 10^{-8}$  |
| [SA] = $10^7$ | [A] = $10^{10}$ | $2.69 \times 10^{-5}$  | $2.69 \times 10^{-5}$  | $2.70 \times 10^{-5}$  | $2.77 \times 10^{-5}$  | $4.14 \times 10^{-5}$  |
| [SA] = $10^7$ | [A] = $10^{11}$ | $2.58 \times 10^{-2}$  | $2.58 \times 10^{-2}$  | $2.59 \times 10^{-2}$  | $2.65 \times 10^{-2}$  | $3.83 \times 10^{-2}$  |

**Table S15** The formation rate  $J$  ( $\text{cm}^{-3} \text{ s}^{-1}$ ) of LAS at  $T = 298.15 \text{ K}$ , with  $[\text{SA}] = 10^6\text{-}10^8$   $\text{molecules}\cdot\text{cm}^{-3}$ ,  $[\text{A}] = 10^7\text{-}10^{11}$   $\text{molecules}\cdot\text{cm}^{-3}$ , and  $[\text{LAS}] = 0, 10^4\text{-}10^7$   $\text{molecules}\cdot\text{cm}^{-3}$ . SA, A and LAS represent sulfuric acid, ammonia and disulfuric acid, respectively.

| [SA]   | [A]       | [LAS] = 0              | [LAS] = $10^3$         | [LAS] = $10^4$         | [LAS] = $10^5$         | [LAS] = $10^6$         |
|--------|-----------|------------------------|------------------------|------------------------|------------------------|------------------------|
| $10^4$ | $10^7$    | $6.98 \times 10^{-32}$ | $1.75 \times 10^{-31}$ | $7.49 \times 10^{-28}$ | $7.44 \times 10^{-24}$ | $7.06 \times 10^{-20}$ |
| $10^4$ | $10^8$    | $6.98 \times 10^{-29}$ | $1.75 \times 10^{-28}$ | $7.49 \times 10^{-25}$ | $7.44 \times 10^{-21}$ | $7.06 \times 10^{-17}$ |
| $10^4$ | $10^9$    | $6.98 \times 10^{-26}$ | $1.75 \times 10^{-25}$ | $7.49 \times 10^{-22}$ | $7.44 \times 10^{-18}$ | $7.06 \times 10^{-14}$ |
| $10^4$ | $10^{10}$ | $6.98 \times 10^{-23}$ | $1.75 \times 10^{-22}$ | $7.50 \times 10^{-19}$ | $7.44 \times 10^{-15}$ | $7.07 \times 10^{-11}$ |
| $10^4$ | $10^{11}$ | $6.98 \times 10^{-20}$ | $1.75 \times 10^{-19}$ | $7.53 \times 10^{-16}$ | $7.47 \times 10^{-12}$ | $7.09 \times 10^{-8}$  |
| $10^5$ | $10^7$    | $6.98 \times 10^{-28}$ | $7.17 \times 10^{-28}$ | $1.75 \times 10^{-27}$ | $7.45 \times 10^{-24}$ | $7.06 \times 10^{-20}$ |
| $10^5$ | $10^8$    | $6.98 \times 10^{-25}$ | $7.17 \times 10^{-25}$ | $1.75 \times 10^{-24}$ | $7.45 \times 10^{-21}$ | $7.06 \times 10^{-17}$ |
| $10^5$ | $10^9$    | $6.98 \times 10^{-22}$ | $7.17 \times 10^{-22}$ | $1.75 \times 10^{-21}$ | $7.45 \times 10^{-18}$ | $7.06 \times 10^{-14}$ |
| $10^5$ | $10^{10}$ | $6.98 \times 10^{-19}$ | $7.17 \times 10^{-19}$ | $1.75 \times 10^{-18}$ | $7.46 \times 10^{-15}$ | $7.07 \times 10^{-11}$ |
| $10^5$ | $10^{11}$ | $6.98 \times 10^{-16}$ | $7.17 \times 10^{-16}$ | $1.75 \times 10^{-15}$ | $7.49 \times 10^{-12}$ | $7.09 \times 10^{-8}$  |
| $10^6$ | $10^7$    | $6.98 \times 10^{-24}$ | $7.00 \times 10^{-24}$ | $7.17 \times 10^{-24}$ | $1.74 \times 10^{-23}$ | $7.08 \times 10^{-20}$ |
| $10^6$ | $10^8$    | $6.98 \times 10^{-21}$ | $7.00 \times 10^{-21}$ | $7.17 \times 10^{-21}$ | $1.74 \times 10^{-20}$ | $7.08 \times 10^{-17}$ |
| $10^6$ | $10^9$    | $6.98 \times 10^{-18}$ | $7.00 \times 10^{-18}$ | $7.17 \times 10^{-18}$ | $1.74 \times 10^{-17}$ | $7.08 \times 10^{-14}$ |
| $10^6$ | $10^{10}$ | $6.98 \times 10^{-15}$ | $7.00 \times 10^{-15}$ | $7.17 \times 10^{-15}$ | $1.74 \times 10^{-14}$ | $7.08 \times 10^{-11}$ |
| $10^6$ | $10^{11}$ | $6.98 \times 10^{-12}$ | $7.00 \times 10^{-12}$ | $7.17 \times 10^{-12}$ | $1.75 \times 10^{-11}$ | $7.11 \times 10^{-8}$  |
| $10^7$ | $10^7$    | $6.99 \times 10^{-20}$ | $6.99 \times 10^{-20}$ | $7.01 \times 10^{-20}$ | $7.18 \times 10^{-20}$ | $1.71 \times 10^{-19}$ |
| $10^7$ | $10^8$    | $6.99 \times 10^{-17}$ | $6.99 \times 10^{-17}$ | $7.01 \times 10^{-17}$ | $7.18 \times 10^{-17}$ | $1.71 \times 10^{-16}$ |
| $10^7$ | $10^9$    | $6.99 \times 10^{-14}$ | $6.99 \times 10^{-14}$ | $7.01 \times 10^{-14}$ | $7.18 \times 10^{-14}$ | $1.71 \times 10^{-13}$ |
| $10^7$ | $10^{10}$ | $6.99 \times 10^{-11}$ | $6.99 \times 10^{-11}$ | $7.01 \times 10^{-11}$ | $7.18 \times 10^{-11}$ | $1.71 \times 10^{-10}$ |
| $10^7$ | $10^{11}$ | $6.99 \times 10^{-8}$  | $6.99 \times 10^{-8}$  | $7.01 \times 10^{-8}$  | $7.18 \times 10^{-8}$  | $1.71 \times 10^{-7}$  |

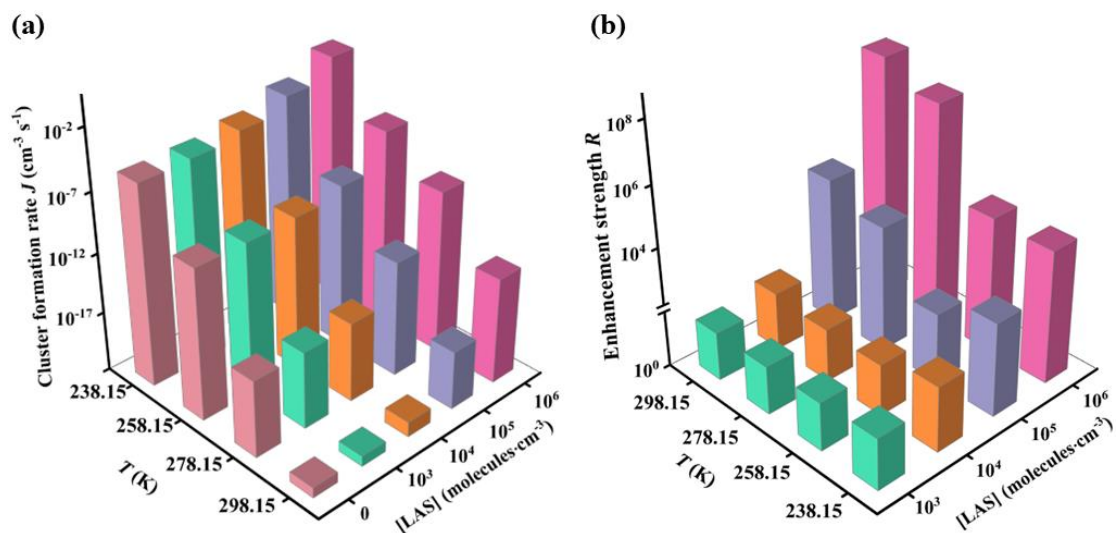

**Fig. S5** (a) Cluster formation rate  $J$  and (b) enhancement factor  $R$  of LAS as functions of  $[LAS]$  ( $10^3$  to  $10^6$  molecules·cm $^{-3}$ ) at temperatures of 238.15, 258.15, 278.15 and 298.15 K, with  $[SA] = 10^5$  molecules·cm $^{-3}$  and  $[A] = 10^9$  molecules·cm $^{-3}$ .

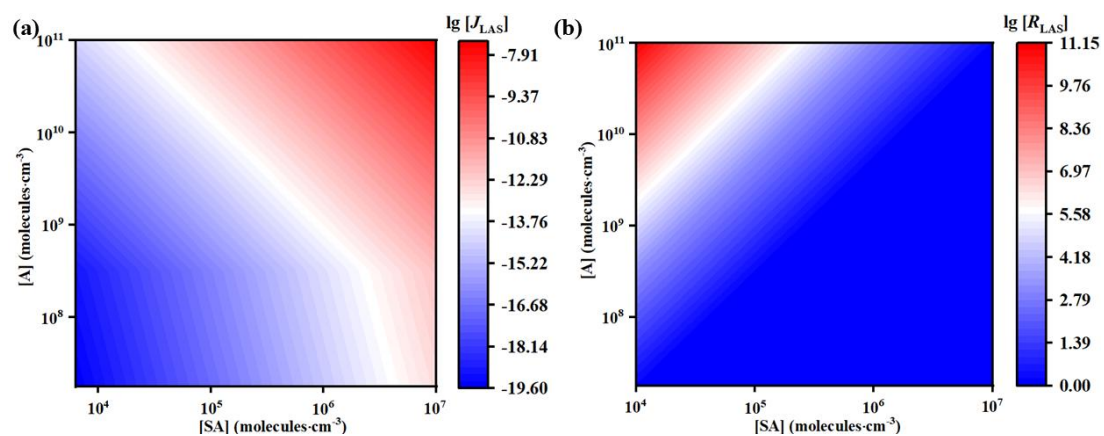

**Fig. S6** (a) Cluster formation rate  $J$  and (b) enhancement factor  $R$  as functions of  $[SA]$  and  $[A]$  at  $[LAS] = 10^5$  molecules·cm $^{-3}$  and 278.15 K. Color bars represent the values of  $\lg [J_{LAS}]$  and  $\lg [R_{LAS}]$ , respectively.

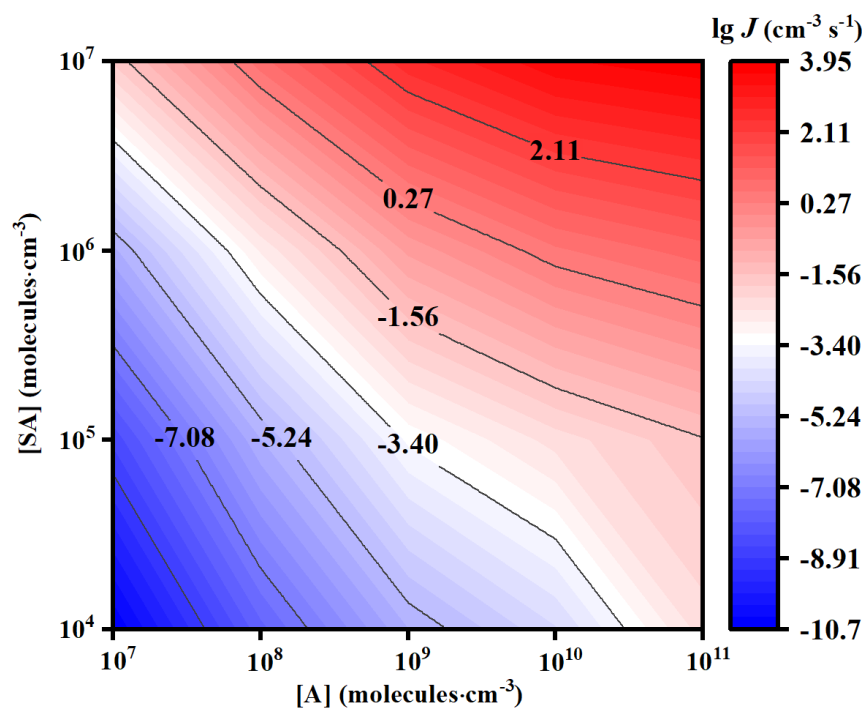

**Fig. S7** Cluster formation rate ( $J$ ) as a function of [SA] and [A] at [LAS]=10<sup>5</sup> molecules·cm<sup>-3</sup> and 238.15 K. Color bars indicate  $\log_{10}[J]$  values.

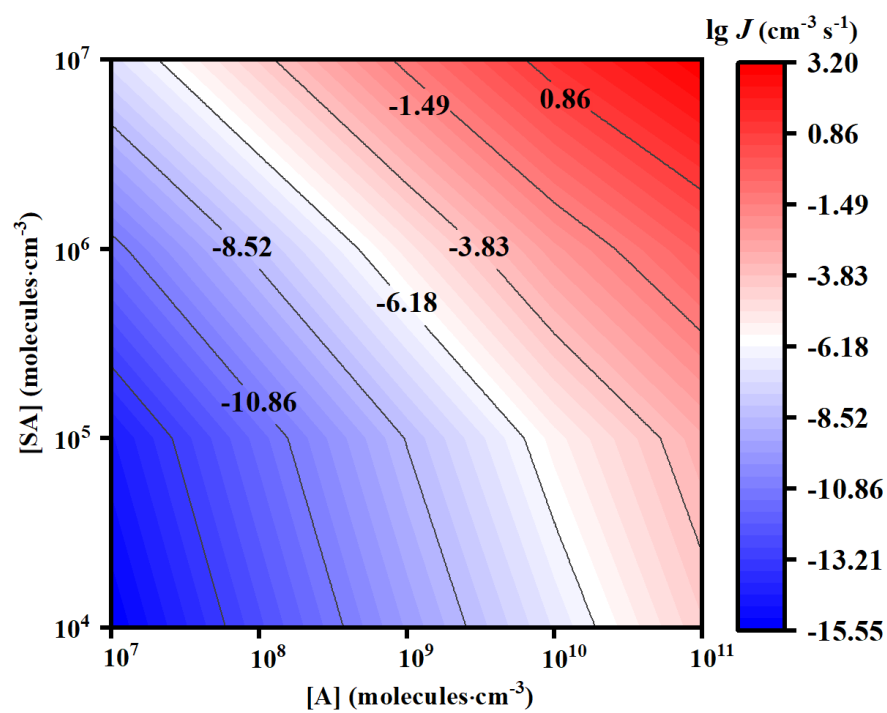

**Fig. S8** Cluster formation rate ( $J$ ) as a function of [SA] and [A] at [LAS]=10<sup>5</sup> molecules·cm<sup>-3</sup> and 258.15 K. Color bars indicate  $\log_{10}[J]$  values.



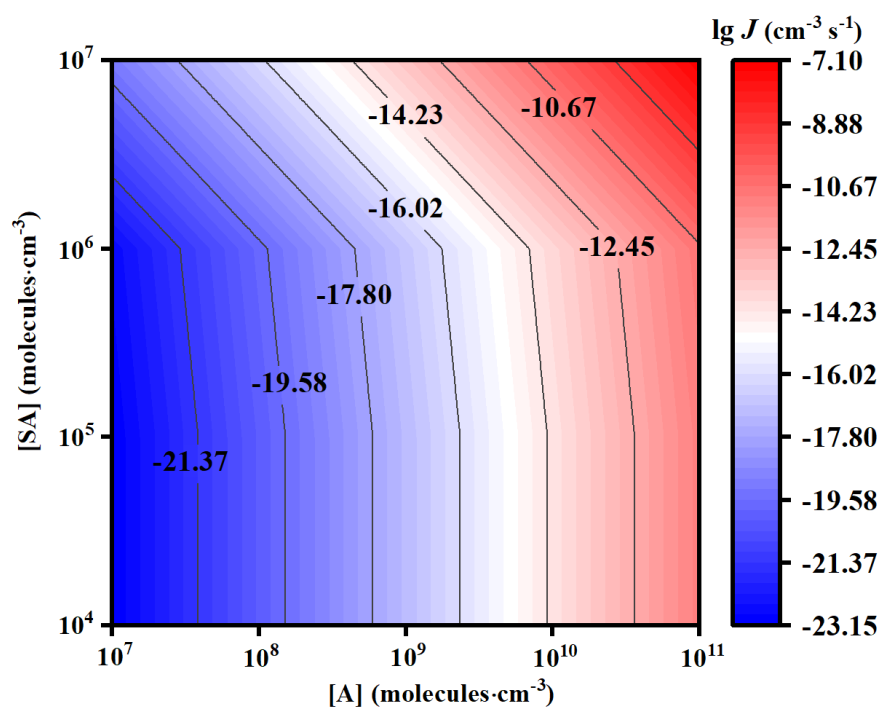

**Fig. S9** Cluster formation rate ( $J$ ) as a function of  $[SA]$  and  $[A]$  at  $[LAS]=10^5 \text{ molecules}\cdot\text{cm}^{-3}$  and 298.15 K. Color bars indicate  $\log_{10}[J]$  values.

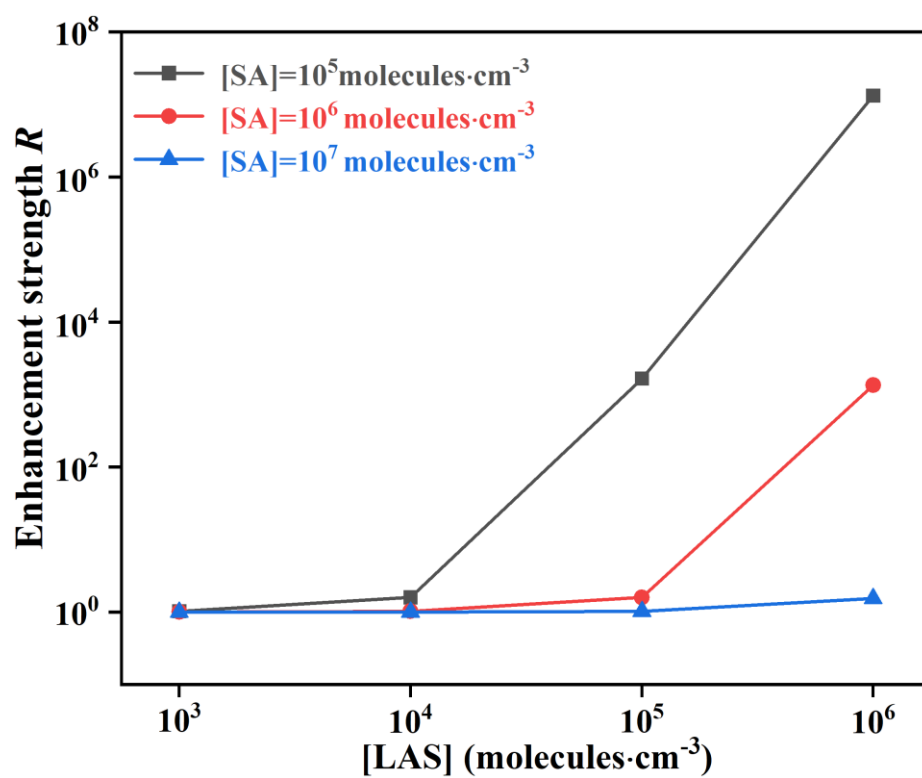

**Fig. S10** Enhancement factor  $R$  as functions of  $[SA]$  and  $[LAS]$  at  $[A] = 10^9$  molecules·cm<sup>-3</sup> and 278.15 K.

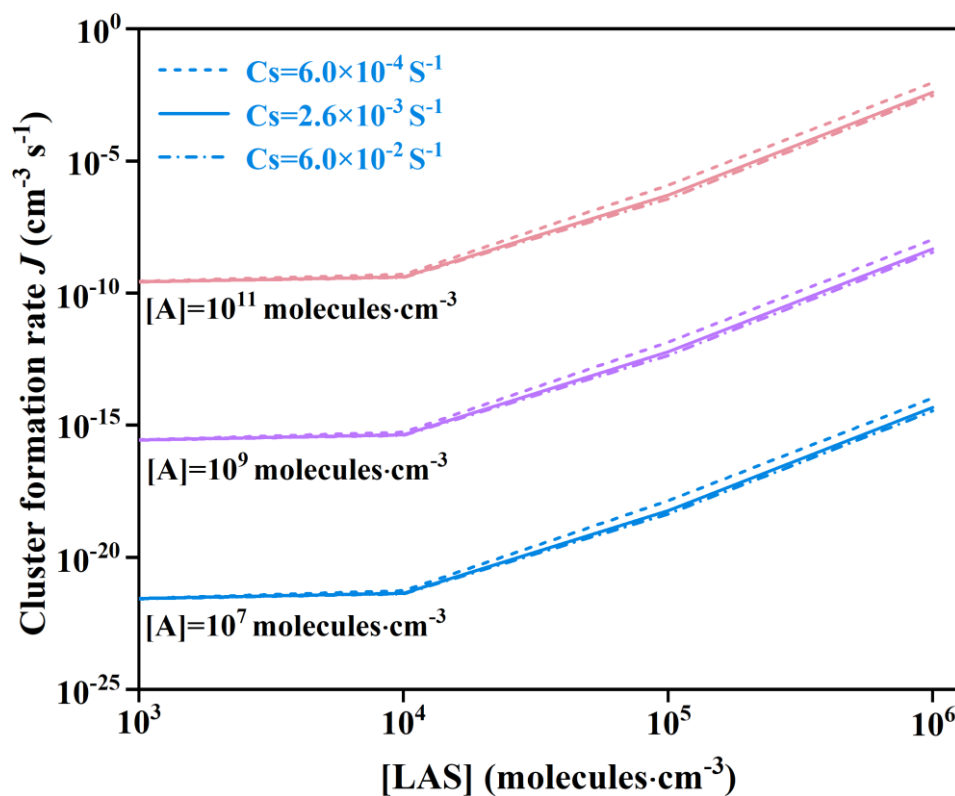

**Fig. S11** The formation rate  $J$  ( $\text{cm}^3 \text{s}^{-1}$ ) of LAS at varying concentrations of A and different condensation sink (CS) values in the SA-A-LAS-based system where  $T = 278.15 \text{ K}$ ,  $[\text{SA}] = 10^5 \text{ molecules cm}^{-3}$ ,  $[\text{LAS}] = 10^3 \sim 10^6 \text{ molecules cm}^{-3}$ .  $\text{CS} = 6 \times 10^{-4} \text{ s}^{-1}$  (dotted lines),  $2.6 \times 10^{-3} \text{ s}^{-1}$  (solid lines) and  $6 \times 10^{-2} \text{ s}^{-1}$  (dash-dotted lines)

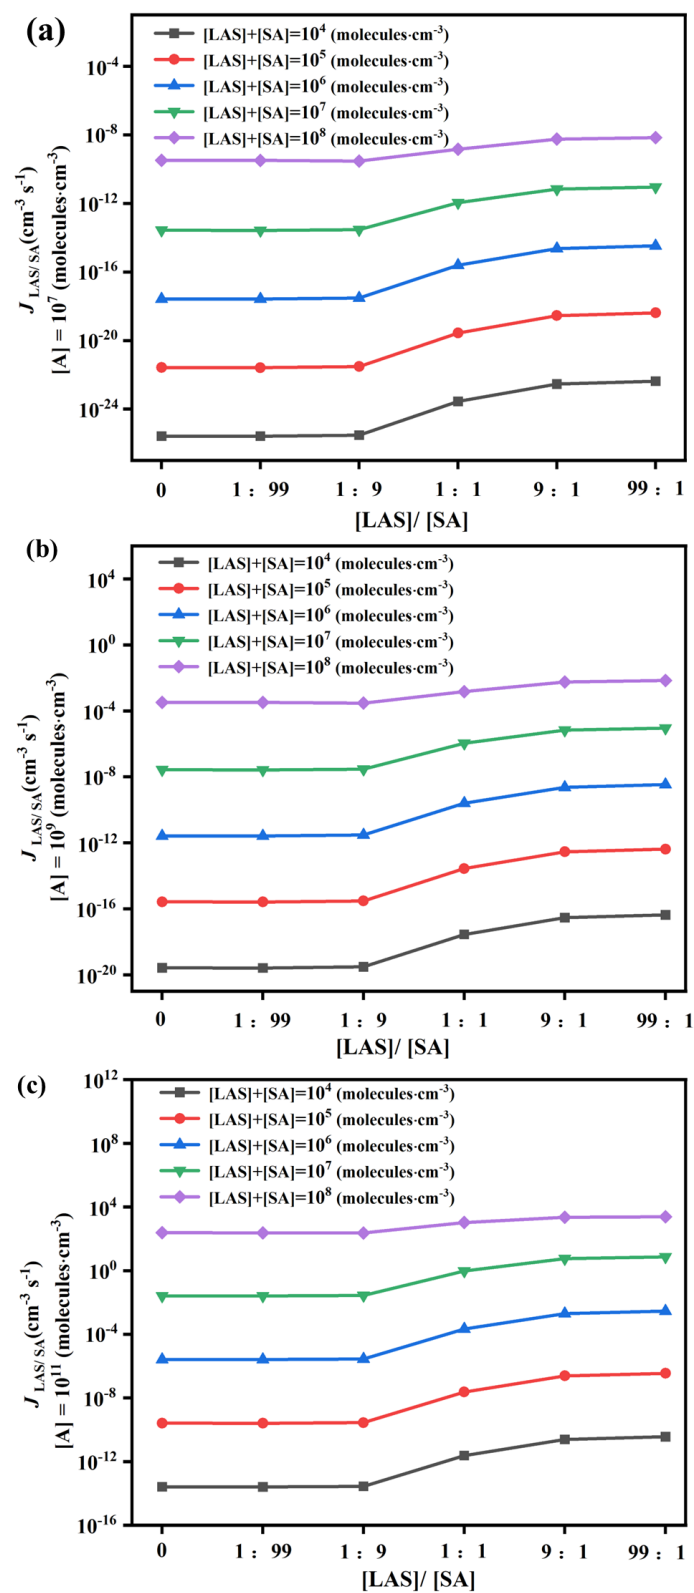

**Fig. S12** Particle formation rates ( $J$ , cm<sup>3</sup>·s<sup>-1</sup>) with varying ratios of [LAS]:[SA] at 278.15 K under different A concentrations ((a)  $10^7$  molecules·cm<sup>-3</sup>, (b)  $10^9$  molecules·cm<sup>-3</sup>, (c)  $10^{11}$  molecules·cm<sup>-3</sup>). [LAS] + [SA] =  $10^4$ - $10^8$  molecules·cm<sup>-3</sup>

The observed concentration dependence indicates that the LAS-driven nucleation process becomes particularly significant in environments with moderate to high LAS concentrations and relatively low SA levels. Therefore, in the LAS-SA-A ternary nucleation system, LAS is likely to function as an "acid" molecule, exhibiting a competitive effect. To evaluate the competitive interactions between LAS and SA molecules, another set of ACDC simulations was conducted, considering different ratios of the concentrations of LAS and SA ( $[LAS]/[SA]$ ) and varying the total concentration of LAS and SA. Fig. S12 shows the variation of  $J_{LAS/SA}$  with the total concentrations of SA and LAS at A concentrations of  $10^7$ ,  $10^9$ , and  $10^{11}$  molecules·cm<sup>-3</sup>.

As shown in Fig. S12(a), at lower atmospheric concentration of A ( $10^7$  molecules·cm<sup>-3</sup>), the formation rate  $J_{LAS/SA}$  increases with the substitution percentage. At a 50% substitution rate ( $[LAS]:[SA] = 1:1$ ),  $J_{LAS/SA}$  sharply increases to  $1.46 \times 10^{-9}$  cm<sup>-3</sup>·s<sup>-1</sup>, which is larger by 1-2 orders of magnitude than the value at unsubstituted condition. At a 99% substitution rate ( $[LAS]:[SA] = 99:1$ ),  $J_{LAS/SA}$  reaches its maximum value of  $6.99 \times 10^{-9}$  cm<sup>-3</sup>·s<sup>-1</sup>, which is 1-3 orders of magnitude greater than the value under non-substituted conditions. These results indicate that, at lower atmospheric concentrations of A, the enhancing effect of LAS on the SA-A group particle formation rate increases with the substitution percentage. At intermediate ( $10^9$  molecules·cm<sup>-3</sup>) and higher concentrations ( $10^{11}$  molecules·cm<sup>-3</sup>) of atmospheric A, the  $J_{LAS/SA}$  at a 99% substitution rate ( $[LAS]:[SA] = 99:1$ ) reaches its maximum value. Compared to the  $J_{LAS/SA}$  under non-substituted conditions, the value at a 99% substitution rate is increased by one order of magnitude. In contrast, urban and industrial environments, which typically have high SA concentrations, favor SA-A self-aggregation nucleation, thereby reducing the relative contribution of LAS.

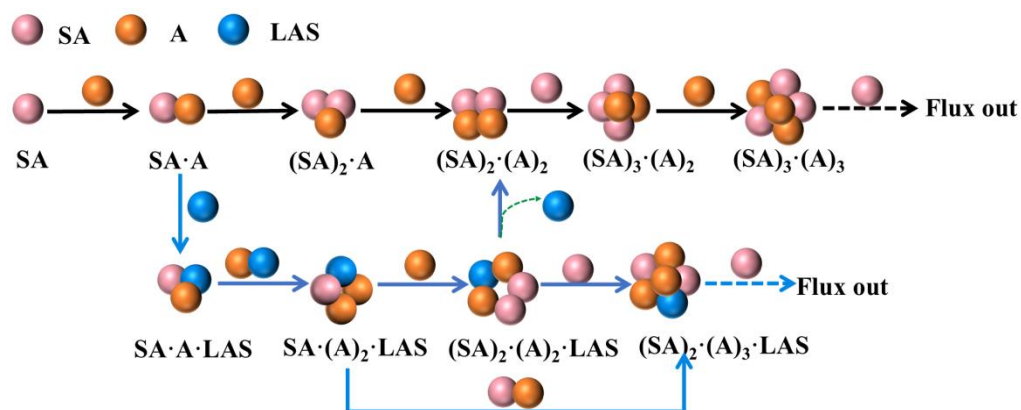

**Fig. S13** Main cluster formation mechanisms in the SA-A-LAS-based system at 238.15 K, with  $[SA] = 10^6 \text{ molecules} \cdot \text{cm}^{-3}$ ,  $[A] = 10^9 \text{ molecules} \cdot \text{cm}^{-3}$ , and  $[LAS] = 10^5 \text{ molecules} \cdot \text{cm}^{-3}$ . Only net fluxes contributing more than 5% to cluster growth are shown. Black arrows indicate pure SA-A-based growth pathways; blue arrows represent pathways involving LAS; green arrows denote pure LAS-A-based growth pathways.

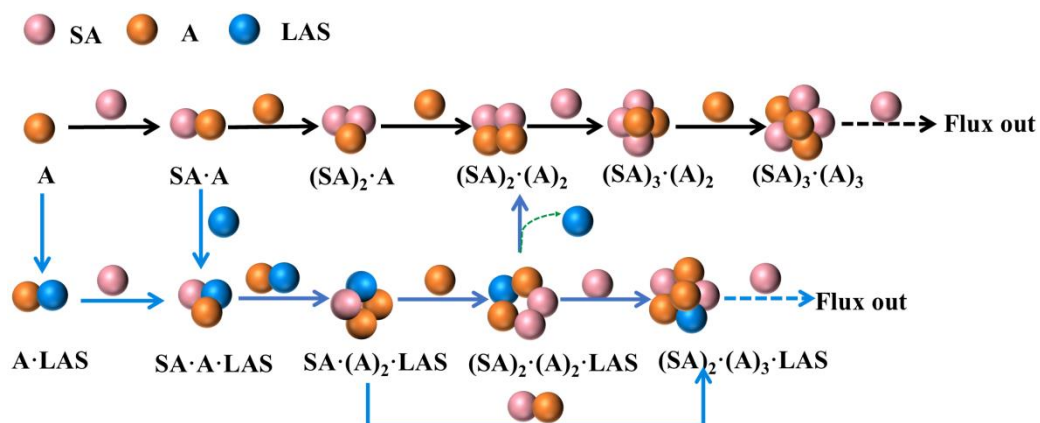

**Fig. S14** Main cluster formation mechanism in the SA-A-LAS-based system at 258.15 K, with  $[SA] = 10^6 \text{ molecules} \cdot \text{cm}^{-3}$ ,  $[A] = 10^9 \text{ molecules} \cdot \text{cm}^{-3}$ , and  $[LAS] = 10^5 \text{ molecules} \cdot \text{cm}^{-3}$ . Only net fluxes contributing more than 5% to cluster growth are shown. Black arrows indicate pure SA-A-based growth pathways; blue arrows represent pathways involving LAS; green arrows denote pure LAS-A-based growth pathways.

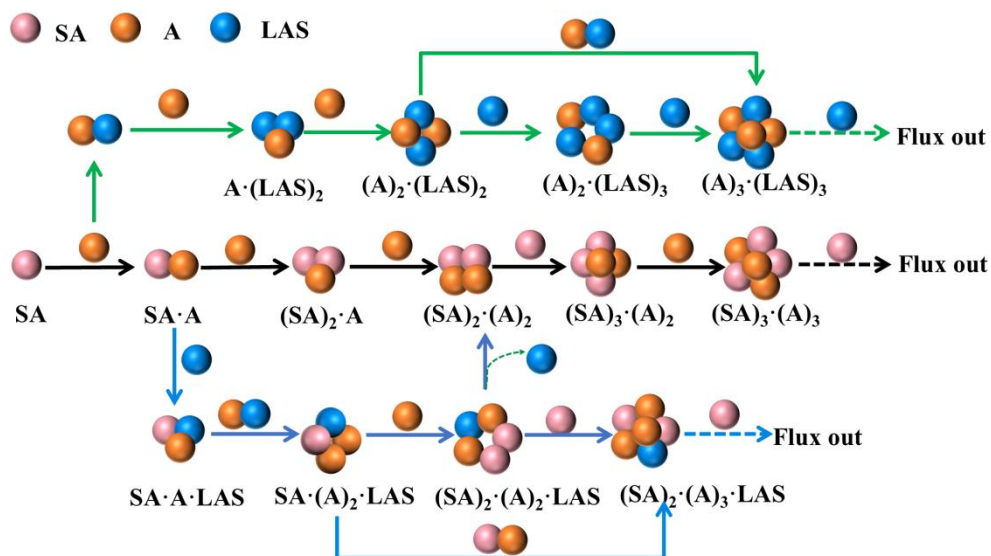

**Fig. S15** Main cluster formation mechanisms in the SA-A-LAS-based system at 298.15 K, with  $[\text{SA}] = 10^6 \text{ molecules} \cdot \text{cm}^{-3}$ ,  $[\text{A}] = 10^9 \text{ molecules} \cdot \text{cm}^{-3}$ , and  $[\text{LAS}] = 10^5 \text{ molecules} \cdot \text{cm}^{-3}$ . Only net fluxes contributing more than 5% to cluster growth are shown. Black arrows indicate pure SA-A-based growth pathways; blue arrows represent pathways involving LAS; green arrows denote pure LAS-A-based growth pathways.



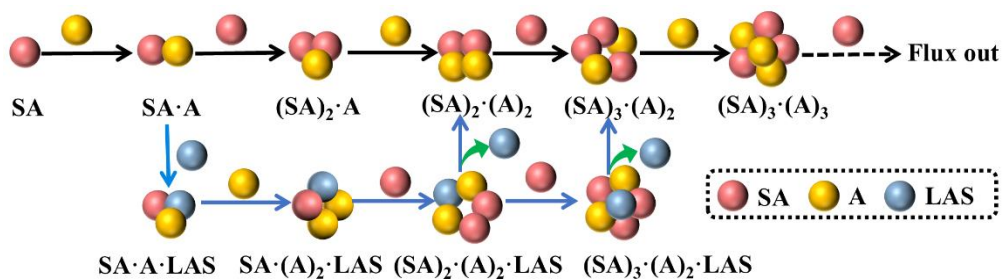

**Fig. S16** Main cluster formation mechanisms in the SA-A-LAS-based system at 278.15 K, with  $[SA] = 9.25 \times 10^6 \text{ molecules} \cdot \text{cm}^{-3}$ ,  $[A] = 10^9 \text{ molecules} \cdot \text{cm}^{-3}$ , and  $[LAS] = 10^4 \text{ molecules} \cdot \text{cm}^{-3}$ . Only net fluxes contributing more than 5% to cluster growth are shown. Black arrows indicate pure SA-A-based growth pathways; blue arrows represent pathways involving LAS; green arrows denote pure LAS-A-based growth pathways.

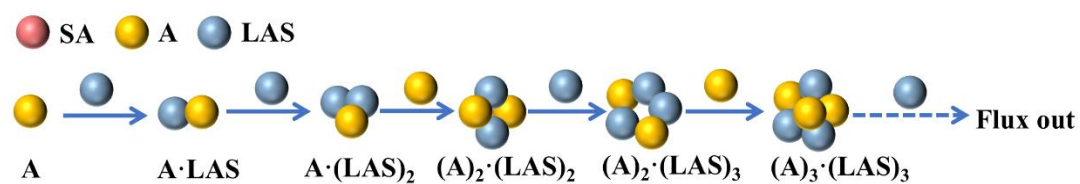

**Fig. S17** Main cluster formation mechanisms in the SA-A-LAS-based system at 278.15 K, with  $[SA] = 10^6 \text{ molecules}\cdot\text{cm}^{-3}$ ,  $[A] = 10^9 \text{ molecules}\cdot\text{cm}^{-3}$ , and  $[LAS] = 1.77 \times 10^6 \text{ molecules}\cdot\text{cm}^{-3}$ . Only net fluxes contributing more than 5% to cluster growth are shown. Black arrows indicate pure SA-A-based growth pathways; blue arrows represent pathways involving LAS; green arrows denote pure LAS-A-based growth pathways.

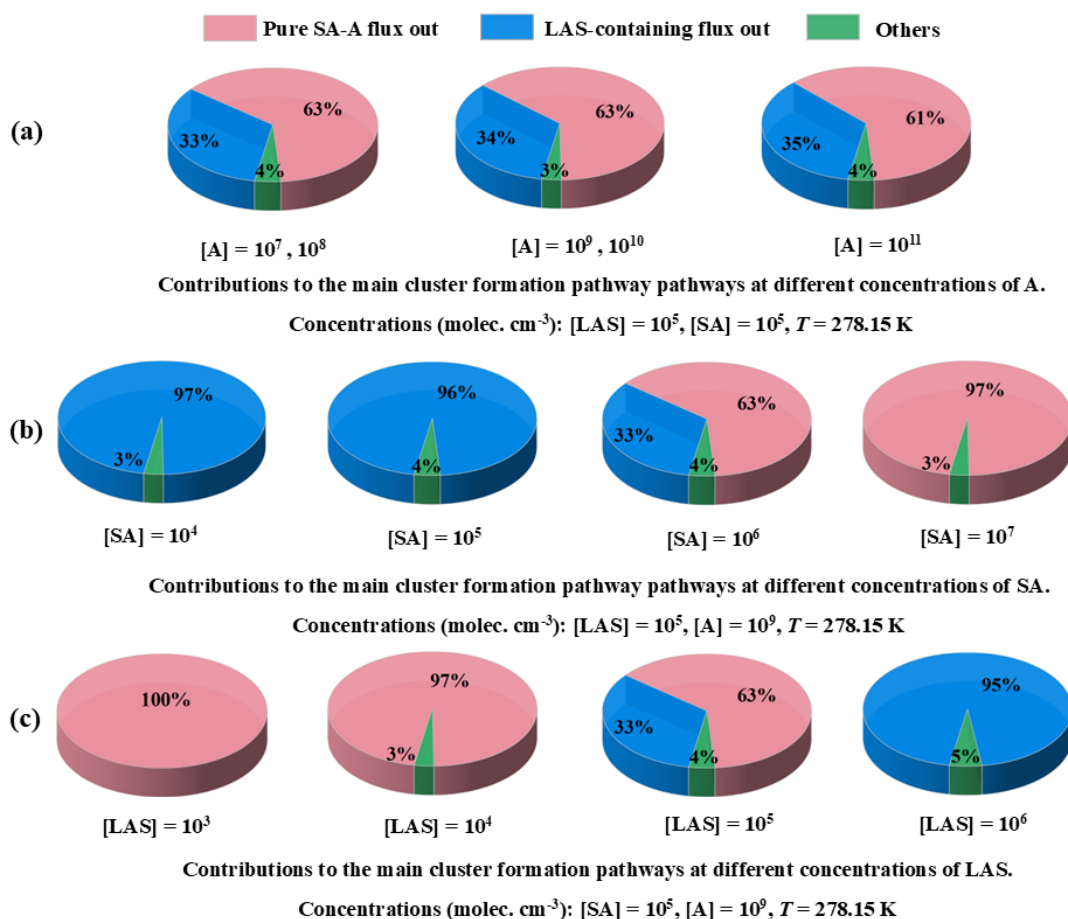

**Fig. S18** The influence of (a) [A], (b) [SA] and (c) [LAS] on the relative contribution of the pure SA-A-based clustering route and the LAS participation route to the system flux is analyzed. Others in (a), (b) and (c) indicate that the route contribution of the cluster growing out of the studied system is less than 5%

**Table S16** Cartesian coordinates of all molecules and clusters in the studied system.**SA:**

| Atoms | X           | Y           | Z           |
|-------|-------------|-------------|-------------|
| S     | -0.00000100 | 0.00000200  | -0.15847400 |
| O     | 0.66569900  | -1.06446300 | -0.82038600 |
| O     | -0.66570900 | 1.06448600  | -0.82034800 |
| O     | 1.02252900  | 0.68572000  | 0.84196700  |
| O     | -1.02251900 | -0.68574400 | 0.84196100  |
| H     | 1.69063500  | 0.03522600  | 1.09500600  |
| H     | -1.69062200 | -0.03525700 | 1.09502400  |

**A:**

| Atoms | X           | Y           | Z           |
|-------|-------------|-------------|-------------|
| N     | 0.00000000  | 0.11333800  | 0.00000000  |
| H     | -0.93914000 | -0.26450400 | 0.00000000  |
| H     | 0.46957000  | -0.26443200 | 0.81335400  |
| H     | 0.46957000  | -0.26443200 | -0.81335400 |

**LAS:**

| Atoms | X           | Y           | Z           |
|-------|-------------|-------------|-------------|
| C     | -2.17748100 | -0.37870600 | 0.11480900  |
| O     | -3.16213200 | -0.06777000 | 0.71067000  |
| H     | -1.23527000 | -1.56295200 | -1.02996700 |
| O     | -2.10331000 | -1.49601300 | -0.61366400 |
| C     | -0.94088600 | 0.51766900  | 0.14960700  |
| C     | -1.22992800 | 1.87167700  | -0.46428000 |
| H     | -0.35448000 | 2.50926300  | -0.37402400 |
| H     | -1.48996200 | 1.75827400  | -1.51560500 |
| H     | -2.06808700 | 2.32278800  | 0.06153100  |
| H     | -0.64595800 | 0.61017600  | 1.19456600  |
| O     | 1.50255800  | -0.86126600 | 1.31709200  |
| O     | 1.81128900  | 1.32530000  | 0.38919500  |
| O     | 2.41465100  | -0.70755400 | -0.95236200 |
| O     | 0.11832100  | -0.15320500 | -0.58703300 |
| S     | 1.59732500  | -0.01418700 | -0.02264600 |
| H     | 1.67531200  | -1.79033100 | 1.11383500  |

**(SA)<sub>1</sub>·(A)<sub>1</sub>:**

| Atoms | X           | Y           | Z           |
|-------|-------------|-------------|-------------|
| S     | -0.59849900 | -0.11290900 | 0.09133500  |
| O     | 0.10965700  | -0.06479400 | 1.33359500  |
| O     | -1.76408700 | -0.91246900 | -0.08540000 |
| O     | 0.39367800  | -0.42172400 | -1.05079200 |

|   |             |             |             |
|---|-------------|-------------|-------------|
| O | -1.01109700 | 1.40357600  | -0.19963600 |
| H | 1.37106100  | -0.22193300 | -0.72476200 |
| H | -1.75621000 | 1.39602100  | -0.81277800 |
| N | 2.72845100  | 0.04170600  | -0.05392700 |
| H | 3.17388500  | 0.91971000  | -0.29060600 |
| H | 3.41309400  | -0.69669300 | -0.16028100 |
| H | 2.44978300  | 0.08078400  | 0.92241700  |

(SA)<sub>1</sub>·(LAS)<sub>1</sub>:

| Atoms | X           | Y           | Z           |
|-------|-------------|-------------|-------------|
| S     | -2.96546200 | 0.53642400  | -0.09103300 |
| O     | -3.89956300 | 1.58279600  | -0.27951900 |
| O     | -2.33737200 | 0.21287600  | -1.47624300 |
| O     | -3.71868500 | -0.80232600 | 0.28709300  |
| O     | -1.92551200 | 0.63783100  | 0.89748800  |
| H     | -4.55783600 | -0.84541700 | -0.19166200 |
| H     | -0.76861400 | -0.44818600 | 1.44463500  |
| O     | -0.43943900 | -1.57610900 | -0.80357100 |
| O     | 0.04576600  | -1.00594900 | 1.53512700  |
| O     | 1.71700200  | -2.16774500 | 0.28035600  |
| O     | 1.14723600  | 0.13383200  | -0.34429900 |
| S     | 0.61936400  | -1.27177400 | 0.11568400  |
| C     | 3.51317900  | 0.68004000  | -0.29899900 |
| C     | 2.18526600  | 0.77228800  | 0.46507000  |
| H     | 2.28852100  | 0.21773000  | 1.40055000  |
| H     | -1.59867700 | -0.43286300 | -1.36315100 |
| O     | 4.20141700  | 1.63927200  | -0.46940400 |
| H     | 3.23678200  | -1.21731000 | -0.46397800 |
| O     | 3.86575700  | -0.53014900 | -0.73063300 |
| C     | 1.75432600  | 2.19333100  | 0.71489700  |
| H     | 2.52127800  | 2.70527200  | 1.29053400  |
| H     | 1.63235000  | 2.71593900  | -0.23112100 |
| H     | 0.81427700  | 2.20185500  | 1.26281000  |

(SA)<sub>1</sub>·(LAS)<sub>1</sub>·(A)<sub>1</sub>:

| Atoms | X          | Y           | Z           |
|-------|------------|-------------|-------------|
| S     | 2.31631600 | -0.71154000 | -0.34042500 |
| O     | 1.87018700 | -0.60614000 | 1.16838500  |
| O     | 2.56814600 | -2.05971700 | -0.70082800 |
| O     | 3.36043300 | 0.28038100  | -0.46184000 |
| O     | 1.09040500 | -0.13623900 | -1.09371000 |
| H     | 2.73717400 | 1.72327500  | 0.17984800  |
| H     | 0.28707000 | -0.81059200 | -1.12655000 |

|   |             |             |             |
|---|-------------|-------------|-------------|
| N | 2.19361900  | 2.43055200  | 0.73147900  |
| H | 1.34374900  | 2.73503100  | 0.20634300  |
| H | 2.77511400  | 3.22537000  | 0.97732200  |
| H | 1.85774300  | 1.95938700  | 1.57232200  |
| C | -0.82723300 | 1.82741200  | 0.09721900  |
| O | -0.28470900 | 2.77543700  | -0.42797300 |
| H | -0.80928600 | 0.56406600  | 1.54371100  |
| O | -0.47853100 | 1.46259200  | 1.32008200  |
| C | -1.92190000 | 1.05496000  | -0.62825200 |
| C | -3.07805800 | 1.98924900  | -0.95019300 |
| H | -3.82258200 | 1.44203200  | -1.52207300 |
| H | -3.53514900 | 2.35135300  | -0.03086800 |
| H | -2.71567800 | 2.83346200  | -1.53111900 |
| H | -1.47784400 | 0.67594700  | -1.54956800 |
| O | -0.68731700 | -1.19485800 | 1.32848800  |
| O | -0.93386000 | -1.55495500 | -1.05844400 |
| O | -2.65227200 | -2.39795200 | 0.48388300  |
| O | -2.44682900 | -0.01630100 | 0.14302300  |
| S | -1.64364000 | -1.43632500 | 0.22574600  |
| H | 0.95947100  | -0.99507800 | 1.27397500  |

(SA)<sub>1</sub>·(LAS)<sub>1</sub>·(A)<sub>2</sub>:

| Atoms | X           | Y           | Z           |
|-------|-------------|-------------|-------------|
| S     | -1.02460600 | 0.26704700  | 0.02376600  |
| O     | -0.11367700 | 0.27314500  | 1.15359400  |
| O     | -2.46437200 | 0.41776700  | 0.69229400  |
| O     | -0.85501800 | 1.39453000  | -0.88254200 |
| O     | -1.06270800 | -1.02892100 | -0.67629700 |
| H     | 0.37804400  | -1.99511700 | -0.07923300 |
| H     | 1.19920400  | -3.06102400 | 0.94399500  |
| N     | 1.23277000  | -2.16064500 | 0.47870300  |
| H     | 1.27652700  | -1.39456500 | 1.16090800  |
| H     | 2.09325800  | -2.06556600 | -0.10851500 |
| H     | 1.55503400  | 1.70222100  | 0.88598200  |
| N     | 1.58922400  | 2.33286400  | 0.07646500  |
| H     | 0.69911300  | 2.19282300  | -0.43611900 |
| H     | 1.69644500  | 3.29691100  | 0.37162700  |
| S     | 3.76089700  | -0.13572500 | -0.12325100 |
| O     | 2.95700700  | 0.03664500  | 1.07775800  |
| O     | 5.25659600  | -0.21465000 | 0.43899900  |
| O     | 3.51419600  | -1.40460700 | -0.80513000 |
| O     | 3.72148300  | 1.01840900  | -1.01743200 |
| H     | 5.85316000  | -0.32960500 | -0.31074500 |
| H     | 2.40833700  | 2.01505500  | -0.48787700 |

|   |             |             |             |
|---|-------------|-------------|-------------|
| C | -3.59263300 | 0.53231300  | -0.20747500 |
| H | -3.22224400 | 0.65813200  | -1.22808600 |
| C | -4.39148600 | -0.77615700 | -0.15276200 |
| O | -5.58160300 | -0.78872400 | -0.03856700 |
| O | -3.68044400 | -1.89630500 | -0.27032900 |
| H | -2.73593500 | -1.70216200 | -0.40843400 |
| C | -4.41664900 | 1.72450100  | 0.20905700  |
| H | -5.29252200 | 1.80266400  | -0.43011400 |
| H | -4.75382700 | 1.60368200  | 1.23631800  |
| H | -3.81629200 | 2.62760500  | 0.12417300  |

(SA)<sub>1</sub>·(LAS)<sub>2</sub>:

| Atoms | X           | Y           | Z           |
|-------|-------------|-------------|-------------|
| S     | 0.08600700  | 0.78431500  | 1.67156300  |
| O     | 1.43997800  | 0.43758200  | 2.41142200  |
| O     | 0.13451700  | 0.20282900  | 0.34165000  |
| O     | -0.15641400 | 2.18176700  | 1.75735500  |
| O     | -0.85723700 | -0.03118700 | 2.56222300  |
| H     | -0.42920000 | 3.45026000  | -0.87035300 |
| H     | -1.38746100 | -0.71428300 | 2.04917100  |
| C     | -1.90481200 | 2.29486600  | -0.81292100 |
| O     | -2.59585000 | 3.06064800  | -0.21886400 |
| H     | 1.10627800  | 1.25080500  | -0.93285500 |
| O     | -0.64766900 | 2.57130500  | -1.21267600 |
| C     | -2.35308200 | 0.90281300  | -1.24688300 |
| C     | -3.58822200 | 0.97971600  | -2.11638800 |
| H     | -3.91030200 | -0.01791200 | -2.40752500 |
| H     | -4.38721400 | 1.47556300  | -1.56939600 |
| H     | -3.36043500 | 1.55100600  | -3.01582800 |
| H     | -1.52979200 | 0.38805600  | -1.73507200 |
| O     | -2.10226900 | -1.88809800 | -1.13706400 |
| O     | -4.29826800 | -1.54424700 | -0.22745500 |
| O     | -2.34464900 | -1.74073800 | 1.29455400  |
| O     | -2.61935900 | 0.23751100  | 0.01037000  |
| S     | -2.92975200 | -1.31075000 | 0.04622900  |
| H     | -1.22384700 | -2.24909300 | -0.84973900 |
| C     | 1.20027100  | -2.25634200 | -0.10172600 |
| O     | 0.33122400  | -2.82371700 | -0.71889400 |
| H     | 1.85006800  | -1.60085400 | 1.55764500  |
| O     | 1.23213000  | -2.26555800 | 1.21472700  |
| C     | 2.34475500  | -1.58548600 | -0.84724500 |
| C     | 3.43443800  | -2.58322600 | -1.19096900 |
| H     | 4.22860200  | -2.07148200 | -1.73039000 |
| H     | 3.84469600  | -3.02370100 | -0.28368600 |

|   |            |             |             |
|---|------------|-------------|-------------|
| H | 3.02080600 | -3.37120800 | -1.81724100 |
| H | 1.91935400 | -1.13427400 | -1.74027700 |
| O | 3.15312800 | 1.71080100  | 0.61660500  |
| O | 1.93484300 | 1.20298500  | -1.45976400 |
| O | 4.28957500 | 0.83816100  | -1.42423800 |
| O | 2.86689300 | -0.56153300 | 0.02161000  |
| S | 3.17087000 | 0.89078400  | -0.55849400 |
| H | 2.13976900 | 1.01539400  | 2.04108500  |

(SA)<sub>1</sub>·(LAS)<sub>2</sub>·(A)<sub>1</sub>:

| Atoms | X           | Y           | Z           |
|-------|-------------|-------------|-------------|
| S     | 0.22739100  | 1.04348200  | 1.77213400  |
| O     | 0.50542700  | 0.76337100  | 0.33598700  |
| O     | -1.07259000 | 0.51605600  | 2.16843300  |
| O     | 0.45536100  | 2.43099600  | 2.08636200  |
| O     | 1.32851900  | 0.25905000  | 2.58971500  |
| H     | 0.71848600  | 3.27659900  | 0.51108100  |
| H     | 1.29165500  | -0.68413900 | 2.34153100  |
| N     | 1.01983900  | 3.49631700  | -0.45647400 |
| H     | 1.93029300  | 3.02848500  | -0.60421700 |
| H     | 1.10866700  | 4.49897800  | -0.58476400 |
| H     | 0.31632600  | 3.10920700  | -1.11422200 |
| C     | 3.07833800  | 0.81527400  | -0.85876200 |
| O     | 3.34786500  | 1.90840700  | -0.42565700 |
| H     | 2.23160400  | -0.24873300 | -2.18468300 |
| O     | 2.43825600  | 0.68045700  | -2.00762500 |
| C     | 3.49558500  | -0.43712400 | -0.10094400 |
| C     | 5.00921500  | -0.53337000 | -0.03216700 |
| H     | 5.28644600  | -1.39038700 | 0.57612100  |
| H     | 5.42645500  | -0.65641400 | -1.03028500 |
| H     | 5.40578900  | 0.37517200  | 0.41419000  |
| H     | 3.07053500  | -0.35232800 | 0.89801800  |
| O     | 0.59348100  | -1.34711100 | -0.98897900 |
| O     | 1.50723100  | -2.10716600 | 1.13830200  |
| O     | 1.58912300  | -3.54919700 | -0.89079900 |
| O     | 3.01299600  | -1.62379700 | -0.75146500 |
| S     | 1.61604000  | -2.27460900 | -0.28542100 |
| H     | 0.44893100  | -0.51248700 | -0.40609000 |
| C     | -1.72041800 | 1.80308600  | -1.15822600 |
| O     | -0.97305500 | 2.23538000  | -2.00314500 |
| H     | -2.43315200 | 1.92762400  | 0.59534500  |
| O     | -1.90235700 | 2.45763300  | -0.02290600 |
| C     | -2.48312100 | 0.50624100  | -1.36829400 |
| C     | -3.36028500 | 0.57726100  | -2.60455200 |



|   |             |             |             |
|---|-------------|-------------|-------------|
| H | -3.84005100 | -0.38730400 | -2.74894100 |
| H | -4.12280400 | 1.34411400  | -2.47768500 |
| H | -2.74887200 | 0.81748300  | -3.47124800 |
| H | -1.73708700 | -0.28539900 | -1.46914000 |
| O | -1.89245500 | -1.49148500 | 0.76291800  |
| O | -3.63221700 | -2.08298100 | -0.76814600 |
| O | -4.22602500 | -1.14465500 | 1.46935200  |
| O | -3.27666100 | 0.28670100  | -0.19333400 |
| S | -3.37014200 | -1.23502100 | 0.34262700  |
| H | -1.60378500 | -0.79780300 | 1.42642500  |

(SA)<sub>1</sub>·(LAS)<sub>2</sub>·(A)<sub>2</sub>:

| Atoms | X           | Y           | Z           |
|-------|-------------|-------------|-------------|
| S     | 2.30007100  | -0.48114800 | -0.29249300 |
| O     | 1.16803100  | -1.36655000 | -0.04847100 |
| O     | 3.46300200  | -1.49385200 | -0.66436800 |
| O     | 2.10142100  | 0.38391300  | -1.45336100 |
| O     | 2.73647100  | 0.23060400  | 0.91147100  |
| H     | 1.25142100  | 0.17092700  | 2.11228100  |
| S     | -2.62384600 | -0.07549600 | 1.06120200  |
| O     | -1.65310500 | -1.15420300 | 0.85232900  |
| O     | -4.03546100 | -0.85969600 | 1.13546000  |
| O     | -2.47245500 | 0.62076000  | 2.30617300  |
| O     | -2.75250600 | 0.77154000  | -0.14081000 |
| H     | -1.41468100 | 0.10170400  | -1.32664800 |
| H     | -0.06343900 | -0.80752400 | 1.83537400  |
| N     | 0.39568900  | -0.21119700 | 2.54455900  |
| H     | -0.26868500 | 0.54296200  | 2.73806600  |
| H     | 0.60603200  | -0.74392100 | 3.38217300  |
| H     | -0.13119700 | -0.95464000 | -1.09132300 |
| N     | -0.85866000 | -0.64039100 | -1.77451500 |
| H     | -0.41169500 | -0.28879900 | -2.61686300 |
| H     | -1.49702100 | -1.41262700 | -1.97820900 |
| C     | -4.92348200 | -0.79936600 | 0.01034500  |
| H     | -5.15733000 | 0.23670900  | -0.22012700 |
| C     | 5.64893100  | -1.32721900 | 0.45215400  |
| C     | -4.31693900 | -1.39756100 | -1.25661300 |
| O     | -4.74928900 | -1.14710100 | -2.33919600 |
| O     | 6.75811700  | -1.77002600 | 0.38630900  |
| O     | 5.08736000  | -0.98566700 | 1.60842500  |
| H     | 4.22549200  | -0.55256000 | 1.46975500  |
| O     | -3.29190400 | -2.26117600 | -1.10513800 |
| H     | -2.97959500 | -2.29452600 | -0.18655400 |
| S     | -0.05848100 | 2.70810600  | -0.17114100 |

|   |             |             |             |
|---|-------------|-------------|-------------|
| O | 0.01714400  | 1.53641300  | 0.67058100  |
| O | 0.71591300  | 3.85361300  | 0.13567500  |
| O | -1.54352600 | 3.14093100  | -0.30877600 |
| O | 0.23053000  | 2.20925800  | -1.63695300 |
| H | -2.11704800 | 2.34248600  | -0.19073600 |
| H | 1.02213600  | 1.60388900  | -1.58494500 |
| C | 4.84600400  | -1.08284100 | -0.82863000 |
| H | 5.22974800  | -1.79393800 | -1.55385600 |
| C | 5.05970300  | 0.33636200  | -1.33070600 |
| H | 6.13229400  | 0.47792900  | -1.45357200 |
| H | 4.56608000  | 0.48162100  | -2.28748300 |
| H | 4.68589400  | 1.07663200  | -0.62542900 |
| C | -6.17047800 | -1.57131700 | 0.39923900  |
| H | -6.62175100 | -1.11390300 | 1.27625600  |
| H | -6.87747200 | -1.54631400 | -0.42712200 |
| H | -5.92265700 | -2.60682900 | 0.62802700  |

**(SA)<sub>1</sub>·(LAS)<sub>2</sub>·(A)<sub>3</sub>:**

| Atoms | X           | Y           | Z           |
|-------|-------------|-------------|-------------|
| S     | -2.01468200 | -0.01002900 | 0.54238000  |
| O     | -1.13682300 | -0.38763600 | 1.61920100  |
| O     | -3.45417800 | -0.07744600 | 1.20633600  |
| O     | -1.81982900 | 1.33452800  | 0.00781200  |
| O     | -2.03490600 | -0.99300400 | -0.56776200 |
| H     | -1.27326300 | 0.03502400  | -1.98104900 |
| S     | 2.24017100  | -0.90522400 | -1.58390700 |
| O     | 1.31706900  | -1.64241300 | -2.44400500 |
| O     | 2.88375000  | -2.09161300 | -0.71155300 |
| O     | 3.29586500  | -0.17582900 | -2.21457200 |
| O     | 1.46139800  | -0.09471000 | -0.60769200 |
| H     | 2.17033200  | 0.43817300  | 2.72821700  |
| H     | 0.11953000  | -0.28569400 | -2.81897500 |
| N     | -0.57275100 | 0.45376600  | -2.60759900 |
| H     | -0.11027200 | 1.23061900  | -2.09679500 |
| H     | -1.00644300 | 0.80869600  | -3.45372100 |
| H     | 1.08752500  | 1.79876000  | 2.47068000  |
| N     | 1.17241500  | 0.88775100  | 2.92138200  |
| H     | 0.99162600  | 0.97461100  | 3.91531800  |
| H     | 0.47233300  | 0.26412000  | 2.50343200  |
| C     | 3.73632300  | -1.65879100 | 0.36664900  |
| H     | 4.35248800  | -0.82808500 | 0.02535100  |
| C     | -4.69351300 | 0.08829000  | 0.47362100  |
| H     | -5.36341100 | 0.51320600  | 1.21517000  |
| C     | -5.30405100 | -1.26381900 | 0.09370800  |

|   |             |             |             |
|---|-------------|-------------|-------------|
| C | 2.88829700  | -1.18810800 | 1.54925600  |
| O | 3.34936500  | -0.23493400 | 2.21329000  |
| O | -6.48976700 | -1.41128300 | 0.13024300  |
| O | -4.48059100 | -2.22423900 | -0.31959800 |
| H | -3.56390100 | -1.90376900 | -0.38397800 |
| O | 1.80764800  | -1.77786800 | 1.80669800  |
| H | 0.96828000  | -2.38430200 | 0.81562300  |
| S | 1.11264000  | 3.15816100  | -0.17282600 |
| O | 0.51217500  | 2.75557200  | -1.42486000 |
| O | 1.60230900  | 4.47529000  | -0.00355900 |
| O | 2.23796900  | 2.16493800  | 0.20658600  |
| O | 0.04208800  | 2.89571700  | 0.96027100  |
| H | 2.01428900  | 1.23355900  | -0.15024900 |
| H | -0.68770400 | 2.31467100  | 0.60854000  |
| N | 0.21785800  | -2.82879200 | 0.11591400  |
| H | 0.64779400  | -2.95618800 | -0.80092300 |
| H | -0.56947500 | -2.18425800 | 0.00693800  |
| H | -0.11846900 | -3.71631600 | 0.47388000  |
| C | 4.59077600  | -2.84471000 | 0.76266000  |
| H | 5.20044600  | -3.16122800 | -0.08051800 |
| H | 5.24046700  | -2.56102800 | 1.58878100  |
| H | 3.95649900  | -3.67128900 | 1.08005200  |
| C | -4.63442700 | 0.99903500  | -0.74220100 |
| H | -4.26400100 | 1.98257900  | -0.46871800 |
| H | -3.99819800 | 0.58468100  | -1.52255700 |
| H | -5.64794800 | 1.08590800  | -1.12957200 |

(LAS)<sub>1</sub>·(A)<sub>1</sub>:

| Atoms | X           | Y           | Z           |
|-------|-------------|-------------|-------------|
| S     | -0.95896800 | -0.52691700 | 0.22557200  |
| O     | -1.53721700 | 0.24939500  | 1.28622500  |
| O     | 0.15580100  | 0.34525100  | -0.48790600 |
| O     | -0.35577600 | -1.78571800 | 0.56120300  |
| O     | -1.93785000 | -0.68347100 | -0.92192900 |
| H     | -2.77483500 | 0.00133000  | -0.80148700 |
| H     | -3.61568100 | 1.20539000  | 0.46678300  |
| N     | -3.84934300 | 0.91228000  | -0.47782100 |
| H     | -4.76348700 | 0.47649500  | -0.46185600 |
| H     | -3.89935600 | 1.73456600  | -1.06698100 |
| C     | 1.31592400  | 0.68811200  | 0.30891400  |
| H     | 1.11875700  | 0.42964500  | 1.35354200  |
| C     | 2.50987000  | -0.15236700 | -0.16660900 |
| O     | 3.58140700  | 0.34126900  | -0.35759000 |
| O     | 2.29230500  | -1.45300700 | -0.32195000 |

|   |            |             |             |
|---|------------|-------------|-------------|
| H | 1.38806400 | -1.71401500 | -0.07373500 |
| C | 1.56576800 | 2.16786800  | 0.16743100  |
| H | 2.45088300 | 2.44307000  | 0.73510900  |
| H | 1.74092200 | 2.41710100  | -0.87712700 |
| H | 0.70489300 | 2.71971500  | 0.53851600  |

(SA)<sub>2</sub>:

| Atoms | X           | Y           | Z           |
|-------|-------------|-------------|-------------|
| S     | -2.04390900 | 0.06786900  | -0.12274300 |
| O     | -1.06625300 | -0.09101600 | -1.16405200 |
| O     | -3.34418400 | 0.55364400  | -0.40365000 |
| O     | -2.13867600 | -1.37002600 | 0.53377700  |
| H     | -2.91688700 | -1.40825700 | 1.10624100  |
| O     | -1.45210400 | 0.94146800  | 1.01741400  |
| H     | -0.49514200 | 0.71878700  | 1.13904200  |
| O     | 1.06633900  | 0.09030600  | 1.16418700  |
| S     | 2.04395700  | -0.06787700 | 0.12273000  |
| O     | 1.45244500  | -0.94153800 | -1.01753300 |
| O     | 3.34450900  | -0.55305800 | 0.40337700  |
| O     | 2.13790700  | 1.37020200  | -0.53350800 |
| H     | 0.49539600  | -0.71919700 | -1.13906000 |
| H     | 2.91599500  | 1.40893500  | -1.10610600 |

(SA)<sub>2</sub>·(A)<sub>1</sub>:

| Atoms | X           | Y           | Z           |
|-------|-------------|-------------|-------------|
| S     | -1.76935400 | -0.34962900 | -0.05233400 |
| O     | -1.08309000 | 0.19932200  | 1.13239500  |
| O     | -0.99133900 | -1.38502800 | -0.71189200 |
| O     | -3.08817800 | -1.06570200 | 0.47333200  |
| H     | -2.85599800 | -1.95590400 | 0.76522200  |
| O     | -2.27997700 | 0.71341300  | -0.90168300 |
| H     | -1.42705000 | 2.08769400  | -0.46598000 |
| O     | 1.40271700  | 1.05968200  | -0.57216200 |
| S     | 2.07096100  | -0.10538600 | -0.01797900 |
| O     | 1.43094700  | -0.40517200 | 1.36903000  |
| O     | 3.47799500  | -0.09578500 | 0.12290300  |
| O     | 1.68380500  | -1.33472400 | -0.89139100 |
| H     | 0.44412500  | -0.22362400 | 1.33583000  |
| H     | 0.69729500  | -1.39466700 | -0.95091500 |
| N     | -0.68484100 | 2.68352600  | -0.01796800 |
| H     | 0.20742800  | 2.15665900  | -0.15300600 |
| H     | -0.88739000 | 2.72499600  | 0.97772000  |
| H     | -0.63328600 | 3.61236300  | -0.42234600 |

**(SA)<sub>2</sub>·(LAS)<sub>1</sub>:**

| Atoms | X           | Y           | Z           |
|-------|-------------|-------------|-------------|
| S     | -1.00918500 | -0.16501900 | -0.38605900 |
| O     | -0.31250800 | -0.40709000 | 0.86726100  |
| O     | -2.32964300 | -0.99478800 | -0.39954800 |
| O     | -1.35625700 | 1.21696600  | -0.62586600 |
| O     | -0.29215000 | -0.76398800 | -1.56520400 |
| H     | 0.57894300  | -1.29521800 | -1.30362300 |
| S     | 1.65543300  | 2.37287900  | 0.21999500  |
| O     | 0.60965500  | 3.25119000  | -0.53722300 |
| O     | 2.77924500  | 3.17900000  | 0.49259100  |
| O     | 0.94353100  | 2.03648100  | 1.57668500  |
| O     | 1.78553600  | 1.12423000  | -0.50788200 |
| H     | 0.42594600  | 1.21420200  | 1.47923400  |
| H     | -0.15099800 | 2.69518400  | -0.79284000 |
| S     | 2.82729800  | -1.92728100 | -0.07504100 |
| O     | 3.71140500  | -0.73995400 | -0.53382800 |
| O     | 3.66499000  | -3.03988900 | 0.13335000  |
| O     | 2.23670400  | -1.44509600 | 1.29189900  |
| O     | 1.70129700  | -2.07088200 | -0.99198100 |
| H     | 1.31946900  | -1.13054200 | 1.16839900  |
| H     | 3.16630900  | 0.07752600  | -0.60671300 |
| C     | -3.32736600 | -0.67857000 | 0.62799000  |
| H     | -2.89894000 | 0.04890500  | 1.32156200  |
| C     | -4.53024800 | -0.02432500 | -0.06478300 |
| O     | -4.25973500 | 0.94779000  | -0.93596900 |
| H     | -3.31259500 | 1.13239000  | -1.00322000 |
| O     | -5.64599500 | -0.35171900 | 0.19606100  |
| C     | -3.68502200 | -1.95859300 | 1.33501900  |
| H     | -4.44947600 | -1.75265200 | 2.07982700  |
| H     | -4.08578900 | -2.67754700 | 0.62406300  |
| H     | -2.80239700 | -2.37059800 | 1.81887300  |

**(SA)<sub>2</sub>·(LAS)<sub>1</sub>·(A)<sub>1</sub>:**

| Atoms | X           | Y           | Z           |
|-------|-------------|-------------|-------------|
| S     | -1.01176800 | -0.32132900 | 0.45902000  |
| O     | -0.99580800 | 0.79003800  | 1.43164100  |
| O     | -2.41248100 | -1.03043700 | 0.59614300  |
| O     | -0.93923500 | 0.16438000  | -0.91867500 |
| O     | -0.06029100 | -1.35389400 | 0.81173300  |
| H     | 0.57319300  | 0.38562000  | 2.40650500  |
| H     | 2.08770000  | 1.02099800  | 2.66987000  |
| N     | 1.53322700  | 0.16835600  | 2.71571500  |
| H     | 1.95208900  | -0.50980600 | 2.03727000  |

|   |             |             |             |
|---|-------------|-------------|-------------|
| H | 1.53665200  | -0.22053700 | 3.65395600  |
| S | 1.23244500  | 2.60022700  | -0.36501500 |
| O | 0.75108900  | 2.12867300  | -1.76931800 |
| O | 2.05317600  | 3.73458400  | -0.53911100 |
| O | -0.06795700 | 3.02271900  | 0.37711500  |
| O | 1.75060800  | 1.42712100  | 0.33330600  |
| H | -0.50330500 | 2.22140200  | 0.77867000  |
| H | 0.15246000  | 1.35574400  | -1.65640200 |
| C | -3.59891900 | -0.22229200 | 0.35616800  |
| H | -3.29856900 | 0.82119400  | 0.23581500  |
| C | -4.23777400 | -0.68228400 | -0.96088100 |
| O | -3.41347600 | -0.83099500 | -1.99672200 |
| H | -2.50077900 | -0.59351000 | -1.77219300 |
| O | -5.41385500 | -0.86380000 | -1.05374000 |
| S | 3.00235900  | -1.85985900 | -0.31564900 |
| O | 4.13052800  | -2.53890800 | -0.82519000 |
| O | 2.99035900  | -1.41135600 | 1.06401800  |
| O | 1.76316300  | -2.77248300 | -0.55876700 |
| O | 2.70712200  | -0.60955800 | -1.20874600 |
| H | 0.97181000  | -2.36176100 | -0.14394300 |
| H | 2.41151000  | 0.14489700  | -0.65269500 |
| C | -4.52435800 | -0.38339600 | 1.53458100  |
| H | -5.43458600 | 0.18377800  | 1.35867000  |
| H | -4.79269500 | -1.43037400 | 1.65662500  |
| H | -4.03388200 | -0.02160100 | 2.43544500  |

(SA)<sub>2</sub>·(LAS)<sub>1</sub>·(A)<sub>2</sub>:

| Atoms | X           | Y           | Z           |
|-------|-------------|-------------|-------------|
| S     | -1.57453400 | -0.61085800 | 0.21592700  |
| O     | -0.69478400 | -1.62406000 | -0.32728300 |
| O     | -3.03170300 | -1.17116700 | -0.08431400 |
| O     | -1.46848700 | -0.36443200 | 1.63474200  |
| O     | -1.51151500 | 0.64782400  | -0.59554400 |
| H     | -0.06202400 | 0.17889600  | -1.71535800 |
| H     | 0.72933300  | -0.29498000 | -3.11981600 |
| N     | 0.85296800  | 0.01456000  | -2.16068500 |
| H     | 1.36784600  | -0.71874500 | -1.60848600 |
| H     | 1.39876800  | 0.87782200  | -2.13012800 |
| H     | 0.85647200  | -1.93818900 | 0.91538900  |
| N     | 1.13549300  | -1.69866800 | 1.87780100  |
| H     | 0.47382900  | -0.97608000 | 2.18037200  |
| H     | 1.08736600  | -2.51661100 | 2.47592500  |
| S     | 3.58679100  | -1.01330300 | -0.33194100 |
| O     | 2.39099500  | -1.73966800 | -0.75971800 |

|   |             |             |             |
|---|-------------|-------------|-------------|
| O | 4.76638600  | -1.92305800 | -0.90013800 |
| O | 3.73506200  | 0.27827300  | -1.01099200 |
| O | 3.75183000  | -0.95386700 | 1.10760100  |
| H | 5.60712700  | -1.55505300 | -0.60014000 |
| H | 2.09807700  | -1.31955600 | 1.82653400  |
| C | -4.15466000 | -0.41551200 | 0.43327400  |
| H | -3.77935900 | 0.39065400  | 1.06864200  |
| C | -4.89194200 | 0.22223200  | -0.75032500 |
| O | -6.08299600 | 0.20433400  | -0.83943200 |
| O | -4.12361700 | 0.82801400  | -1.65671300 |
| H | -3.18605700 | 0.79179200  | -1.40397000 |
| C | -5.03448600 | -1.34923400 | 1.22548400  |
| H | -5.91167300 | -0.81209300 | 1.57689300  |
| H | -5.36591900 | -2.17221000 | 0.59567600  |
| H | -4.47655700 | -1.73873500 | 2.07402600  |
| S | 1.34609900  | 2.09409000  | 0.60083200  |
| O | 1.18477000  | 0.66394700  | 0.73511000  |
| O | 1.87811800  | 2.85682500  | 1.66897300  |
| O | -0.01746700 | 2.69900400  | 0.16560500  |
| O | 2.18989100  | 2.31758900  | -0.70986200 |
| H | -0.64436200 | 1.95871000  | -0.06253900 |
| H | 2.90888400  | 1.61288700  | -0.72481400 |

**(SA)<sub>2</sub>·(LAS)<sub>1</sub>·(A)<sub>3</sub>:**

| Atoms | X           | Y           | Z           |
|-------|-------------|-------------|-------------|
| S     | -2.11642300 | -0.47143800 | -0.34478100 |
| O     | -0.98003500 | 0.42927500  | -0.49321600 |
| O     | -3.35791600 | 0.46555400  | -0.67216800 |
| O     | -2.09346000 | -1.56352500 | -1.30531200 |
| O     | -2.29681300 | -0.92592700 | 1.04002600  |
| H     | -0.54051800 | -0.81729100 | 1.78376000  |
| H     | 0.76345400  | 0.23260500  | 1.48484700  |
| N     | 0.48109200  | -0.71619700 | 1.81854100  |
| H     | 0.94171100  | -1.39096500 | 1.18386600  |
| H     | 0.85044700  | -0.86112700 | 2.75294800  |
| H     | -0.44299300 | -1.59473500 | -2.00052700 |
| N     | 0.55375800  | -1.37922400 | -2.18781400 |
| H     | 1.16381500  | -1.86203500 | -1.49900800 |
| H     | 0.81511400  | -1.62702600 | -3.13611400 |
| S     | 1.65859000  | 2.08211300  | -0.39995200 |
| O     | 2.74168500  | 3.03269500  | -0.55856800 |
| O     | 1.81889500  | 0.90089300  | -1.27806700 |
| O     | 1.45780600  | 1.69622100  | 0.99386500  |
| O     | 0.36096200  | 2.81488700  | -0.89931400 |

|   |             |             |             |
|---|-------------|-------------|-------------|
| H | 0.70145900  | -0.37205900 | -2.01531300 |
| H | -0.38298700 | 2.18852800  | -0.79332900 |
| S | 3.41621500  | -1.65058200 | 0.34062900  |
| O | 4.43644000  | -2.64099900 | 0.43389800  |
| O | 3.85680100  | -0.69633400 | -0.86044400 |
| O | 2.06867800  | -2.15137500 | -0.01670300 |
| O | 3.29317500  | -0.74905500 | 1.50987700  |
| H | 3.11411400  | -0.06250100 | -1.04975800 |
| H | 4.93044200  | 1.96872600  | 1.83096000  |
| C | -4.73208200 | 0.03180100  | -0.50854600 |
| H | -5.26345500 | 0.60241300  | -1.26415600 |
| C | -5.30788200 | 0.49066000  | 0.83409600  |
| O | -6.44459800 | 0.86018100  | 0.89555400  |
| O | -4.52652700 | 0.41556200  | 1.90602100  |
| H | -3.67020700 | -0.00096800 | 1.69789200  |
| N | 4.54878300  | 1.53249300  | 0.99742500  |
| H | 5.30409900  | 1.21956100  | 0.39135100  |
| H | 3.95600800  | 2.21306700  | 0.47831000  |
| H | 3.97765600  | 0.66627700  | 1.26194900  |
| C | -4.98332800 | -1.45427100 | -0.71209500 |
| H | -4.65190800 | -1.76560100 | -1.69854100 |
| H | -4.47071900 | -2.05598800 | 0.03626200  |
| H | -6.05605200 | -1.61545900 | -0.62112400 |

**(SA)<sub>2</sub>·(A)<sub>2</sub>:**

| Atoms | X           | Y           | Z           |
|-------|-------------|-------------|-------------|
| S     | -1.98527000 | 0.06019200  | -0.13165900 |
| O     | -1.94585100 | 1.50267600  | -0.36384000 |
| O     | -3.45405200 | -0.40805400 | -0.56585500 |
| O     | -1.13262500 | -0.71715500 | -1.02373000 |
| O     | -1.81953100 | -0.29404000 | 1.27183000  |
| H     | -0.62436700 | 2.25190300  | 0.39887800  |
| H     | -4.09523900 | 0.12722600  | -0.08324700 |
| S     | 2.12696800  | -0.08241900 | -0.14556000 |
| O     | 2.09058800  | -1.50978000 | -0.48429900 |
| O     | 1.26111100  | 0.67174000  | -1.26380700 |
| O     | 1.35759200  | 0.13089400  | 1.11037600  |
| O     | 3.39844000  | 0.56508400  | -0.18341300 |
| H     | 0.88841600  | -2.12928700 | 0.29737900  |
| H     | 0.41650000  | 0.18667900  | -1.37934900 |
| N     | 0.00229300  | -2.43548200 | 0.82047900  |
| H     | -0.66962700 | -2.77720000 | 0.13741100  |
| H     | 0.20663700  | -3.13890300 | 1.52129200  |
| H     | -0.41772000 | -1.59386800 | 1.24705100  |
| N     | 0.30232200  | 2.48478500  | 0.82193500  |



|   |            |            |            |
|---|------------|------------|------------|
| H | 0.20060800 | 3.09063400 | 1.62797400 |
| H | 0.76220000 | 1.53887400 | 1.07762200 |
| H | 0.88775300 | 2.92351600 | 0.11548800 |

**(LAS)<sub>2</sub>:**

| Atoms | X           | Y           | Z           |
|-------|-------------|-------------|-------------|
| S     | 2.17738500  | 1.71207100  | 0.04051600  |
| O     | 1.12522700  | 1.55094600  | -0.93198900 |
| O     | 2.92354500  | 2.90596300  | 0.13335300  |
| O     | 1.59640500  | 1.35833200  | 1.44509300  |
| H     | 0.73646300  | 0.88521900  | 1.35297600  |
| O     | -0.71617800 | 0.04350900  | 1.00764500  |
| S     | -1.19359800 | -0.34879600 | -0.29708200 |
| O     | -1.49110700 | 0.94391700  | -1.13264900 |
| O     | -0.46812900 | -1.30700900 | -1.04747900 |
| H     | -0.65180400 | 1.44680000  | -1.21328300 |
| O     | 3.23103200  | 0.56117800  | -0.19790300 |
| C     | 2.74051500  | -0.80187600 | -0.34514100 |
| H     | 1.75990500  | -0.88993300 | 0.12550200  |
| C     | 2.66651200  | -1.17449300 | -1.80851800 |
| H     | 2.33431700  | -2.20658800 | -1.88720800 |
| H     | 1.95375800  | -0.52877700 | -2.31470800 |
| H     | 3.64693500  | -1.07419700 | -2.27147200 |
| C     | 3.67933700  | -1.72747600 | 0.43020200  |
| O     | 3.51118400  | -2.90748700 | 0.40289200  |
| O     | 4.66469900  | -1.15938800 | 1.12667800  |
| H     | 4.64650000  | -0.20111900 | 1.01446500  |
| O     | -2.66204500 | -0.87214300 | -0.15900500 |
| C     | -3.58498900 | -0.11572400 | 0.68728000  |
| H     | -3.16762500 | 0.87554300  | 0.86276900  |
| C     | -3.79693800 | -0.86217000 | 1.98374200  |
| H     | -4.16318300 | -1.86751000 | 1.78357600  |
| H     | -2.85945100 | -0.91991100 | 2.53178400  |
| H     | -4.53562300 | -0.32836400 | 2.57643200  |
| C     | -4.89024500 | 0.08622200  | -0.08330300 |
| O     | -4.91894600 | -0.29459600 | -1.36016700 |
| H     | -4.07781700 | -0.69073100 | -1.61641800 |
| O     | -5.82670300 | 0.58431100  | 0.46041700  |

**(LAS)<sub>2</sub>·(A)<sub>1</sub>:**

| Atoms | X           | Y          | Z           |
|-------|-------------|------------|-------------|
| N     | -1.38743300 | 2.56247600 | -1.11254600 |
| H     | -1.11570400 | 1.56264700 | -1.00769900 |

|   |             |             |             |
|---|-------------|-------------|-------------|
| H | -1.39042500 | 2.81812400  | -2.09469700 |
| H | -2.32663400 | 2.65597800  | -0.70920300 |
| C | -3.51882800 | 0.46028500  | -0.29528400 |
| O | -3.72174800 | 1.53752600  | 0.20266100  |
| H | -2.84193000 | -0.50815600 | -1.79219800 |
| O | -3.23087300 | 0.36975300  | -1.59436800 |
| C | -3.55883900 | -0.85852100 | 0.49890400  |
| C | -4.47453300 | -0.74090500 | 1.69230200  |
| H | -4.45176100 | -1.67129900 | 2.25433900  |
| H | -4.14954100 | 0.07950600  | 2.32695000  |
| H | -5.49310400 | -0.54544600 | 1.36130700  |
| H | -3.86886000 | -1.66265100 | -0.16945400 |
| O | -1.64602900 | -1.80351600 | -1.27678800 |
| O | -0.09580500 | -2.12076800 | 0.61124700  |
| O | -0.58371100 | 0.11409900  | -0.21224700 |
| O | -2.25463500 | -1.17224700 | 1.00775300  |
| S | -1.05127600 | -1.26479000 | -0.06895800 |
| H | -0.67767700 | 3.10382600  | -0.59275300 |
| C | 1.44267700  | 2.04914700  | 0.04065600  |
| O | 0.85336700  | 3.01235000  | 0.47672900  |
| H | 1.73288100  | 0.88405400  | -1.45420300 |
| O | 1.44366300  | 1.80418200  | -1.25627000 |
| C | 2.14652700  | 1.07409600  | 0.98189000  |
| C | 2.67258100  | 1.76651700  | 2.22026000  |
| H | 3.09956900  | 1.02347900  | 2.88896200  |
| H | 3.44087500  | 2.48793400  | 1.94876800  |
| H | 1.86088500  | 2.28725100  | 2.72030600  |
| H | 1.39261900  | 0.33072800  | 1.25026100  |
| O | 2.40773400  | -1.83219100 | 0.76550800  |
| O | 4.35170700  | -1.45487800 | -0.64148000 |
| O | 2.07701800  | -0.79822600 | -1.40619300 |
| O | 3.26084400  | 0.43318000  | 0.34039900  |
| S | 3.04833700  | -0.98936000 | -0.35339800 |
| H | 1.39809100  | -1.93472800 | 0.64684600  |

**(LAS)<sub>2</sub>·(A)<sub>2</sub>:**

| Atoms | X           | Y           | Z           |
|-------|-------------|-------------|-------------|
| S     | 1.99076300  | -0.26995700 | -0.01608100 |
| O     | 1.06518500  | -0.18054100 | 1.09838500  |
| O     | 3.39620900  | -0.56222700 | 0.68074200  |
| O     | 1.73215700  | -1.36436300 | -0.93478700 |
| O     | 2.17182300  | 1.02668300  | -0.70276400 |
| H     | 1.02949200  | 2.17420000  | 0.01556900  |
| S     | -2.48694300 | 1.18831700  | -0.18077000 |

|   |             |             |             |
|---|-------------|-------------|-------------|
| O | -1.80678400 | 0.72484900  | 1.03255800  |
| O | -4.06321800 | 0.95512200  | 0.14559800  |
| O | -2.34564200 | 2.60828300  | -0.40163600 |
| O | -2.20644900 | 0.33690700  | -1.33149600 |
| H | -1.38211700 | -1.13079900 | -0.79544600 |
| H | -0.00929400 | 1.74426500  | 1.22045300  |
| N | 0.31109700  | 2.55173000  | 0.66783700  |
| H | -0.51802600 | 2.90736300  | 0.16886700  |
| H | 0.71437500  | 3.26506200  | 1.26635200  |
| H | -0.77310700 | -1.35125100 | 0.71428500  |
| N | -0.92417700 | -1.83120600 | -0.17872600 |
| H | 0.00427200  | -2.06140900 | -0.55903400 |
| H | -1.53986600 | -2.63482700 | -0.06617800 |
| C | -4.67708500 | -0.21400900 | -0.41052100 |
| H | -4.56932700 | -0.20936800 | -1.49178700 |
| C | 4.52104100  | -0.81690000 | -0.19384800 |
| H | 4.15671300  | -0.92537500 | -1.21855700 |
| C | 5.45398200  | 0.39934200  | -0.14737000 |
| C | -4.01560200 | -1.49553500 | 0.08968800  |
| O | -3.98589700 | -2.50199800 | -0.56062800 |
| O | 6.63396200  | 0.29112400  | 0.01057800  |
| O | 4.87021500  | 1.58493100  | -0.32242800 |
| H | 3.91437400  | 1.48679500  | -0.48421900 |
| O | -3.48147300 | -1.46606900 | 1.31693300  |
| H | -3.36989800 | -0.55494600 | 1.63060600  |
| C | 5.20209000  | -2.08180000 | 0.26436200  |
| H | 6.07009200  | -2.27846500 | -0.35992000 |
| H | 5.53902400  | -1.97203200 | 1.29289400  |
| H | 4.50360000  | -2.91261800 | 0.19415100  |
| C | -6.13591100 | -0.18619300 | 0.00493100  |
| H | -6.60056700 | 0.72042100  | -0.37514700 |
| H | -6.64629200 | -1.05363900 | -0.40902100 |
| H | -6.22478800 | -0.20183900 | 1.09006700  |

(SA)<sub>3</sub>:

| Atoms | X           | Y           | Z           |
|-------|-------------|-------------|-------------|
| S     | 0.18420700  | 1.32393500  | -0.06376700 |
| O     | -0.07936000 | 0.10716800  | -0.82066100 |
| O     | 1.39800700  | 2.00440600  | -0.38233900 |
| H     | 3.14082500  | 1.28744900  | -0.26099000 |
| O     | 0.10569000  | 0.98656800  | 1.45256900  |
| O     | -0.98458100 | 2.30188300  | -0.20416000 |
| O     | 3.84751100  | 0.61578000  | -0.20963100 |
| S     | 3.21853700  | -0.78586500 | 0.09265400  |

|   |             |             |             |
|---|-------------|-------------|-------------|
| O | 4.28365900  | -1.69798000 | 0.24204700  |
| O | 2.45805400  | -1.13840400 | -1.23559500 |
| O | -2.42809800 | -1.23933200 | -1.05481200 |
| H | 1.54850400  | -0.78495900 | -1.20456200 |
| H | -1.54697200 | -0.80010800 | -1.02022800 |
| O | 2.22430200  | -0.62726900 | 1.12872700  |
| O | -3.14850800 | 0.85895200  | -0.03329700 |
| H | 0.83423300  | 0.35176300  | 1.64307800  |
| H | -1.85406100 | 1.81303500  | -0.13777100 |
| O | -4.69254100 | -1.07332300 | -0.27731300 |
| S | -3.39617800 | -0.55768800 | -0.04537800 |
| O | -2.86112400 | -1.05091600 | 1.35730700  |
| H | -3.21168800 | -1.93354200 | 1.54158600  |

(SA)<sub>3</sub>·(A)<sub>1</sub>:

| Atoms | X           | Y           | Z           |
|-------|-------------|-------------|-------------|
| N     | -0.05211300 | 0.36418400  | 2.52190300  |
| H     | -0.92755600 | 0.12725200  | 2.01514500  |
| H     | 0.68571800  | -0.26724900 | 2.17260800  |
| H     | -0.17637200 | 0.26155400  | 3.52356900  |
| S     | 1.04454400  | 1.98710900  | -0.14967300 |
| O     | 0.01432600  | 0.94579400  | -0.25027600 |
| O     | 1.18648800  | 2.51744400  | 1.18192900  |
| H     | 0.25092500  | 1.31832300  | 2.27297400  |
| O     | 2.28773900  | 1.53703100  | -0.79797900 |
| S     | -2.88805200 | -0.41028000 | -0.10672100 |
| O     | -2.09182900 | -1.31312400 | -1.10220300 |
| O     | -2.60422400 | 1.03669900  | -0.62118600 |
| O     | -4.26847400 | -0.65812400 | -0.28224700 |
| O     | -2.28587500 | -0.56146200 | 1.20144900  |
| H     | -1.18385800 | -1.49514600 | -0.77402800 |
| H     | -1.63424400 | 1.20617500  | -0.54124200 |
| S     | 1.71019900  | -1.67137900 | -0.07241700 |
| O     | 2.64617700  | -2.94041800 | -0.09412700 |
| O     | 2.21949100  | -0.87609000 | -1.26375400 |
| O     | 0.36866200  | -2.14623400 | -0.29036100 |
| O     | 2.00304300  | -0.99324000 | 1.15997500  |
| H     | 2.25779700  | -3.60894600 | -0.67355300 |
| H     | 2.27424200  | 0.16766700  | -1.06122400 |
| O     | 0.55138200  | 3.22674600  | -1.01383800 |
| H     | 0.73583400  | 3.05370200  | -1.94565100 |

(SA)<sub>3</sub>·(A)<sub>2</sub>:

| Atoms | X           | Y           | Z           |
|-------|-------------|-------------|-------------|
| N     | -0.01391100 | -2.02910600 | 0.09508700  |
| H     | -0.79103400 | -2.12376000 | -0.57703900 |
| H     | 0.90622900  | -1.89330600 | -0.36185700 |
| H     | 0.00286700  | -2.83367600 | 0.71419700  |
| N     | -2.34000200 | 1.89261200  | 1.66553800  |
| H     | -3.28613700 | 2.12031200  | 1.37052500  |
| H     | -2.13842600 | 2.28527800  | 2.57903200  |
| H     | -2.25952800 | 0.85603500  | 1.67417800  |
| S     | -3.06529100 | -0.81069700 | -0.12581900 |
| O     | -2.56171300 | -1.82565200 | -1.03489300 |
| O     | -3.03586500 | 0.54056100  | -0.68687500 |
| O     | -2.47187000 | -0.85825100 | 1.21058100  |
| H     | -1.35514400 | 0.64468300  | -1.42148100 |
| S     | 0.28498600  | 1.50837900  | -0.40397500 |
| O     | -0.37821800 | 0.55379400  | -1.48066700 |
| O     | 1.58420500  | 1.83817700  | -0.93390000 |
| O     | -0.62624700 | 2.63465600  | -0.22908200 |
| O     | 0.35152700  | 0.70345900  | 0.84302400  |
| H     | -0.20623800 | -1.17664500 | 0.63776300  |
| H     | -1.66285700 | 2.26087600  | 0.93407800  |
| O     | -4.60054000 | -1.15742900 | 0.15004700  |
| H     | -5.03265300 | -1.31487500 | -0.69892800 |
| S     | 3.47070300  | -0.69508500 | 0.14000000  |
| O     | 3.93041100  | 0.65534800  | -0.48074000 |
| O     | 2.72519900  | -0.27812200 | 1.45312300  |
| O     | 4.62312800  | -1.42530600 | 0.51468700  |
| O     | 2.49349700  | -1.28510700 | -0.75106500 |
| H     | 3.12836200  | 1.15677900  | -0.77049200 |
| H     | 1.85747300  | 0.16316500  | 1.23843100  |

(SA)<sub>3</sub>·(A)<sub>3</sub>:

| Atoms | X           | Y           | Z           |
|-------|-------------|-------------|-------------|
| S     | 2.58494200  | -1.22685200 | 0.07734200  |
| O     | 1.45675300  | -2.11414600 | 0.31629000  |
| O     | 3.90450900  | -2.13428500 | 0.14732000  |
| O     | 2.65420800  | -0.67743100 | -1.26903400 |
| H     | 3.87404700  | -2.64740900 | 0.96356700  |
| S     | -2.77710800 | -0.99140100 | -0.06139000 |
| O     | -2.81933800 | 0.30525400  | 0.59155900  |
| O     | -4.12571200 | -1.68896100 | 0.44644800  |
| O     | -2.85360300 | -0.96982800 | -1.51658600 |
| H     | -4.27944700 | -2.47120300 | -0.09589400 |
| S     | -0.32071600 | 2.26002000  | 0.04013600  |

|   |             |             |             |
|---|-------------|-------------|-------------|
| O | 0.26019100  | 0.94246700  | -0.30433500 |
| O | -0.58275500 | 2.34615600  | 1.46776200  |
| O | -1.68810400 | 2.38192400  | -0.72166300 |
| O | 0.49842400  | 3.34009600  | -0.50193200 |
| H | 1.99382600  | 2.65725700  | -0.60436900 |
| O | 2.72524300  | -0.22226000 | 1.13903900  |
| N | -0.11804700 | -0.30897500 | 2.15759400  |
| N | 2.84524600  | 2.03284600  | -0.56068800 |
| N | -0.10298200 | -1.23859700 | -1.88739400 |
| H | 3.70742500  | 2.54320100  | -0.71550300 |
| H | 2.86213400  | 1.54461600  | 0.34571700  |
| H | 2.74630400  | 1.25564000  | -1.22653500 |
| H | -2.29560100 | 1.70954800  | -0.33204400 |
| H | 0.18146200  | -1.89274100 | -1.14639700 |
| H | 0.49325600  | -1.35461000 | -2.69936000 |
| H | -1.10864900 | -1.34274800 | -2.08295200 |
| H | 0.04044300  | -0.29492700 | -1.47126000 |
| H | 0.87512300  | -0.32564200 | 1.89523600  |
| H | -0.64294200 | -0.92655900 | 1.50307400  |
| H | -0.46159600 | 0.66466700  | 2.04175300  |
| H | -0.24381500 | -0.62909700 | 3.11147800  |
| O | -1.66798600 | -1.82839000 | 0.41132200  |

**(LAS)<sub>3</sub>:**

| Atoms | X           | Y           | Z           |
|-------|-------------|-------------|-------------|
| S     | 1.71625600  | -0.87209900 | -0.29588100 |
| O     | 1.35378100  | -0.20623100 | 0.93146000  |
| O     | 1.08986200  | -2.09656100 | -0.63071900 |
| O     | 1.64700700  | 0.14683900  | -1.46642600 |
| H     | 1.22201800  | 0.98279500  | -1.16273000 |
| O     | 0.84077700  | 2.50690600  | -0.43717800 |
| S     | 0.28887800  | 2.98002300  | 0.80643900  |
| O     | -0.22429300 | 1.75545500  | 1.63281800  |
| O     | 1.02571000  | 3.86052700  | 1.62794600  |
| H     | 0.22300300  | 0.91830400  | 1.33344600  |
| O     | 3.25961100  | -1.18443800 | -0.26065000 |
| C     | 4.24571300  | -0.11632900 | -0.36555700 |
| H     | 4.13599100  | 0.32315400  | -1.35702800 |
| C     | 4.12308600  | 0.93554200  | 0.71622400  |
| H     | 5.01629300  | 1.55422800  | 0.67658200  |
| H     | 3.25070000  | 1.56393600  | 0.55419400  |
| H     | 4.05240500  | 0.46913500  | 1.69717500  |
| C     | 5.61909600  | -0.79506100 | -0.33543200 |
| O     | 6.60903600  | -0.13165000 | -0.30302300 |

|   |             |             |             |
|---|-------------|-------------|-------------|
| O | 5.65233900  | -2.12623500 | -0.37952200 |
| H | 4.75958100  | -2.49152800 | -0.39408400 |
| O | -1.09308600 | 3.69896300  | 0.52557000  |
| C | -1.91762200 | 3.28158700  | -0.58464500 |
| H | -1.29689500 | 2.78928000  | -1.33230600 |
| C | -2.57898700 | 4.52484200  | -1.14738200 |
| H | -3.15572100 | 5.02986500  | -0.37464000 |
| H | -1.81563200 | 5.20153400  | -1.52210100 |
| H | -3.24155400 | 4.23614700  | -1.95912400 |
| C | -2.95766900 | 2.25911600  | -0.15866100 |
| O | -3.00827500 | 1.84276200  | 1.08714800  |
| H | -2.23816200 | 2.13103300  | 1.59749900  |
| O | -3.73411100 | 1.83388000  | -0.98424000 |
| C | -2.83519200 | -3.94707400 | 0.61554400  |
| O | -2.81974700 | -5.13995100 | 0.65495600  |
| H | -3.82152700 | -2.30273200 | 0.57885700  |
| O | -3.97322900 | -3.25231500 | 0.66088700  |
| C | -1.51736600 | -3.17618900 | 0.54981700  |
| C | -0.69295800 | -3.43802400 | 1.79349000  |
| H | 0.26112200  | -2.92490700 | 1.70992300  |
| H | -1.21873100 | -3.08681200 | 2.68034100  |
| H | -0.52927800 | -4.50908900 | 1.88158400  |
| H | -0.98893800 | -3.48757900 | -0.34737000 |
| O | -3.45603200 | -0.75155000 | -0.86011000 |
| O | -1.62843700 | -1.91263400 | -1.96304500 |
| O | -1.22239500 | 0.23878500  | -0.77760600 |
| O | -1.73120700 | -1.74035600 | 0.49264200  |
| S | -1.91558600 | -1.01601700 | -0.90309000 |
| H | -3.67452800 | 0.22469600  | -0.88737400 |

**(LAS)<sub>3</sub>·(A)<sub>1</sub>:**

| Atoms | X           | Y          | Z           |
|-------|-------------|------------|-------------|
| N     | -0.65609000 | 1.69085700 | 2.53100300  |
| H     | -0.81547300 | 1.69688300 | 1.50534700  |
| H     | -0.55105600 | 0.71245300 | 2.83429700  |
| H     | 0.19547000  | 2.21807700 | 2.72383200  |
| C     | 2.33179200  | 2.32255800 | 0.32099700  |
| O     | 1.66553900  | 2.84804600 | 1.16807300  |
| H     | 3.70615800  | 1.03257600 | -0.10423400 |
| O     | 3.39798400  | 1.58384100 | 0.64221600  |
| C     | 2.05840200  | 2.49679500 | -1.17202800 |
| C     | 2.62586800  | 3.81954400 | -1.64841200 |
| H     | 2.41855100  | 3.94355000 | -2.70832400 |
| H     | 2.16667600  | 4.63392000 | -1.09173800 |

|   |             |             |             |
|---|-------------|-------------|-------------|
| H | 3.70351400  | 3.83858900  | -1.49199400 |
| H | 2.48569700  | 1.66215000  | -1.72977800 |
| O | 0.74024700  | 0.34494600  | -0.34832800 |
| O | -0.62438400 | 0.70686600  | -2.33690100 |
| O | -1.28553800 | 1.69553300  | -0.20656600 |
| O | 0.64810000  | 2.55097300  | -1.38439100 |
| S | -0.20104100 | 1.23558900  | -1.04923600 |
| H | -1.49479900 | 2.08757300  | 2.95657400  |
| C | -3.34602800 | 0.65166400  | 1.40119300  |
| O | -3.51941500 | 1.68992000  | 1.98546800  |
| H | -2.26021100 | -0.93580300 | 1.24556200  |
| O | -2.51954700 | -0.25939900 | 1.89752400  |
| C | -4.05093600 | 0.37829400  | 0.07368300  |
| C | -5.50300300 | 0.80716700  | 0.12798800  |
| H | -5.95297200 | 0.67858000  | -0.85316700 |
| H | -6.04661600 | 0.20310900  | 0.85211900  |
| H | -5.55756500 | 1.85100300  | 0.42434800  |
| H | -3.50995400 | 0.94913500  | -0.68079500 |
| O | -2.80203400 | -0.63851200 | -2.36017700 |
| O | -3.31586800 | -2.88987900 | -1.57365600 |
| O | -1.63826300 | -1.48001000 | -0.40177300 |
| O | -4.03842000 | -1.01953600 | -0.27622400 |
| S | -2.86080800 | -1.61571800 | -1.16378900 |
| H | -1.93573000 | -0.10932600 | -2.36075900 |
| C | 1.13344200  | -0.95945000 | 2.26810600  |
| O | 0.06727800  | -1.16117400 | 2.78942500  |
| H | 2.55165400  | 0.29700900  | 1.92071200  |
| O | 1.80477700  | 0.15454800  | 2.52770100  |
| C | 1.75535600  | -1.98274400 | 1.33084200  |
| C | 2.22484400  | -3.21308300 | 2.08246000  |
| H | 2.64412800  | -3.92671100 | 1.37652500  |
| H | 2.98703600  | -2.94280000 | 2.81147600  |
| H | 1.37839400  | -3.66483000 | 2.59508700  |
| H | 0.99231500  | -2.22908100 | 0.59359600  |
| O | 1.83064300  | -1.65428500 | -1.51495700 |
| O | 3.82249800  | -2.87986800 | -0.98477900 |
| O | 3.93367100  | -0.41213700 | -1.21222800 |
| O | 2.86577200  | -1.32169700 | 0.69120200  |
| S | 3.22109700  | -1.60558200 | -0.83923700 |
| H | 1.29672700  | -0.85055100 | -1.22151800 |

(LAS)<sub>3</sub>·(A)<sub>2</sub>:

| Atoms | X          | Y           | Z           |
|-------|------------|-------------|-------------|
| S     | 1.78985500 | -1.47957300 | -0.37487300 |



---

|   |             |             |             |
|---|-------------|-------------|-------------|
| O | 0.55632300  | -2.22297700 | -0.09143600 |
| O | 2.87891800  | -2.64320500 | -0.37292200 |
| O | 1.79962100  | -0.84859300 | -1.67762300 |
| O | 2.14937300  | -0.58366600 | 0.73131600  |
| H | -0.04159400 | -0.05822200 | 2.06603400  |
| S | -3.19470900 | -0.11521100 | 1.36259800  |
| O | -2.15493500 | -0.44749700 | 0.39430000  |
| O | -4.53140000 | -0.86020800 | 0.82394600  |
| O | -3.00900700 | -0.68388300 | 2.67054100  |
| O | -3.52181400 | 1.31652600  | 1.33199500  |
| H | -1.78211700 | -1.15908900 | -2.69364200 |
| H | -0.02961000 | -1.61089900 | 1.47429800  |
| N | -0.16247100 | -1.04727400 | 2.33640900  |
| H | -1.11530800 | -1.15651600 | 2.70336700  |
| H | 0.54369800  | -1.30150000 | 3.02036700  |
| H | -1.02823700 | -0.16479400 | -1.56137900 |
| N | -0.94611500 | -1.02421000 | -2.11967800 |
| H | -0.07168700 | -0.96228600 | -2.64482400 |
| H | -0.82403500 | -1.78165700 | -1.43712800 |
| C | -4.88464800 | -0.53934000 | -0.52618300 |
| H | -4.71616300 | 0.51935900  | -0.71871300 |
| C | 4.30121800  | -2.37368100 | -0.45209700 |
| H | 4.69398000  | -3.24802400 | -0.96272800 |
| C | 4.93440600  | -2.38927300 | 0.94171800  |
| C | -4.01208300 | -1.32691700 | -1.49306600 |
| O | -3.76714800 | -0.93759300 | -2.60386700 |
| O | 5.99402700  | -2.91569000 | 1.11894000  |
| O | 4.28204700  | -1.75896700 | 1.91644500  |
| H | 3.48553200  | -1.31094000 | 1.57072100  |
| O | -3.56093500 | -2.50644000 | -1.06861900 |
| H | -3.73773700 | -2.59792700 | -0.12148600 |
| O | -1.85118100 | 2.57749300  | -0.00281700 |
| O | -0.32548800 | 1.72781700  | 1.70355300  |
| O | 0.04631200  | 1.16474200  | -0.64792700 |
| O | 0.29507500  | 3.48164000  | 0.06442600  |
| S | -0.43559000 | 2.12141800  | 0.32214500  |
| C | 2.37745300  | 3.38665100  | -1.30853100 |
| C | 1.75464900  | 3.59350100  | 0.08142500  |
| H | 1.89047300  | 4.64817600  | 0.29480100  |
| H | -2.56101200 | 2.07846600  | 0.59336400  |
| O | 3.01015300  | 4.27369900  | -1.80285500 |
| H | 1.70979200  | 1.57091500  | -1.41020500 |
| O | 2.28265300  | 2.19375500  | -1.88716300 |
| C | -6.34529800 | -0.90090300 | -0.72256200 |
| H | -6.95669700 | -0.30255800 | -0.05190200 |

---

|   |             |             |             |
|---|-------------|-------------|-------------|
| H | -6.63398800 | -0.69811000 | -1.75205500 |
| H | -6.50909400 | -1.95572500 | -0.50674300 |
| C | 2.43818000  | 2.73865900  | 1.12971900  |
| H | 2.03882500  | 2.95905000  | 2.11671300  |
| H | 2.33018200  | 1.67387100  | 0.92665200  |
| H | 3.49913700  | 2.98686800  | 1.11319200  |
| C | 4.70097100  | -1.11351300 | -1.20520100 |
| H | 5.78904200  | -1.08172400 | -1.22851200 |
| H | 4.31822200  | -1.13660300 | -2.22132800 |
| H | 4.33352400  | -0.21213700 | -0.71712900 |

**(LAS)<sub>3</sub>·(A)<sub>3</sub>:**

| Atoms | X           | Y           | Z           |
|-------|-------------|-------------|-------------|
| S     | -0.50159100 | 2.94509000  | -0.63015500 |
| O     | 0.32460500  | 1.93109300  | 0.03970600  |
| O     | -1.79787100 | 3.14859600  | 0.31936600  |
| O     | 0.11867600  | 4.26306400  | -0.57022800 |
| O     | -0.98807700 | 2.52977200  | -1.92308200 |
| H     | 0.23144800  | 1.04057200  | -3.09181700 |
| S     | -0.99267700 | -2.01483600 | -0.85023100 |
| O     | -1.10329300 | -0.55662200 | -0.65696500 |
| O     | -2.51407600 | -2.50422900 | -1.05613600 |
| O     | -0.34440400 | -2.37333300 | -2.08780700 |
| O     | -0.50991600 | -2.67363100 | 0.35411300  |
| H     | 0.25765600  | -1.36372600 | 1.33823400  |
| S     | 3.55758700  | 0.43030200  | -0.29810600 |
| O     | 3.13036500  | 1.29972000  | -1.39881900 |
| O     | 2.74394700  | -0.94305900 | -0.61383100 |
| O     | 4.96133100  | 0.08702500  | -0.30722800 |
| O     | 3.05450700  | 0.87441800  | 0.99804400  |
| H     | 2.49340200  | 2.77808600  | 0.84309600  |
| H     | 0.46357800  | 0.28419300  | 1.06780800  |
| N     | 0.51678400  | -0.46016300 | 1.77662800  |
| H     | 1.46724900  | -0.52003000 | 2.14066000  |
| H     | -0.16143700 | -0.25358100 | 2.51040900  |
| H     | 1.60579300  | 0.67241600  | -2.19384500 |
| N     | 0.68082300  | 0.33988800  | -2.50589000 |
| H     | 0.74257800  | -0.57195300 | -2.95840000 |
| H     | 0.06265400  | 0.20897100  | -1.67660100 |
| H     | 1.68430600  | 3.98555000  | -0.03546000 |
| N     | 2.61713700  | 3.55445400  | 0.17938300  |
| H     | 2.95957900  | 3.08008300  | -0.66698000 |
| H     | 3.29196600  | 4.23008700  | 0.52092100  |
| C     | -3.38944900 | -2.35206700 | 0.07847300  |

---

|   |             |             |             |
|---|-------------|-------------|-------------|
| H | -2.80254500 | -2.14968800 | 0.97447100  |
| C | -4.30569900 | -1.14474200 | -0.10529500 |
| O | -5.20239000 | -0.92023000 | 0.65349900  |
| O | -4.05874300 | -0.34619400 | -1.14981800 |
| H | -3.28047100 | -0.67229700 | -1.62122000 |
| C | -2.58696900 | 1.96420800  | 0.53592200  |
| H | -2.48612900 | 1.28449800  | -0.30612300 |
| C | -2.07218900 | 1.23524800  | 1.76632600  |
| O | -1.28130600 | 1.93889700  | 2.58912100  |
| H | -1.10926200 | 2.80173200  | 2.18527500  |
| O | -2.34913500 | 0.09620800  | 2.02042200  |
| C | 3.40353700  | -2.15782400 | -0.17985300 |
| H | 4.39113000  | -2.17738500 | -0.63721900 |
| C | 3.53335300  | -2.11601700 | 1.35538700  |
| O | 2.61678600  | -2.39863700 | 2.07742200  |
| O | 4.71117000  | -1.74102900 | 1.84557700  |
| H | 5.22536300  | -1.28448100 | 1.16044600  |
| C | -4.18765000 | -3.62974400 | 0.23585000  |
| H | -4.90697800 | -3.50691900 | 1.04142000  |
| H | -4.72159600 | -3.85552300 | -0.68598800 |
| H | -3.51264300 | -4.45047900 | 0.46612500  |
| C | -4.03584300 | 2.37022700  | 0.72091500  |
| H | -4.63271900 | 1.48291300  | 0.92755900  |
| H | -4.13329400 | 3.07904500  | 1.54264700  |
| H | -4.39275800 | 2.83237600  | -0.19615300 |
| C | 2.56658200  | -3.32774500 | -0.63003800 |
| H | 3.09378000  | -4.25159100 | -0.39403600 |
| H | 1.60438300  | -3.33148100 | -0.12695700 |
| H | 2.40885000  | -3.27377800 | -1.70509300 |

---
